# Supplementary material for: Three amphioxus reference genomes reveal gene and chromosome evolution of chordates
Source: PubMed Central journal article supplement — Proc Natl Acad Sci U S A. 2023 Mar 3;120(10):e2201504120. doi: 10.1073/pnas.2201504120 (PMC10013865; doi:10.1073/pnas.2201504120), 2023-03-03
Supplement: pnas.2201504120.sapp.pdf [file pnas.2201504120.sapp.pdf]

## Supporting Information for

### Three amphioxus reference genomes reveal gene and chromosome evolution of chordates

Zhen Huang<sup>1,2,\*</sup>, Luohao Xu<sup>3,4,5,\*†</sup>, Cheng Cai<sup>6,\*</sup>, Yitao Zhou<sup>1,7,\*</sup>, Jing Liu<sup>5</sup>, Zaoxu Xu<sup>3,4</sup>, Zexian Zhu<sup>6</sup>, Wen Kang<sup>6</sup>, Wab Cen<sup>7</sup>, Surui Pei<sup>8</sup>, Duo Chen<sup>1,7,9</sup>, Chenggang Shi<sup>10</sup>, Xiaotong Wu<sup>10</sup>, Yongji Huang<sup>11</sup>, Chaohua Xu<sup>1</sup>, Yanan Yan<sup>1</sup>, Ying Yang<sup>1</sup>, Ting Xue<sup>1,7,9</sup>, Wenjing He<sup>1</sup>, Xuefeng Hu<sup>1</sup>, Yanding Zhang<sup>1</sup>, Youqiang Chen<sup>1,7,9</sup>, Changwei Bi<sup>12</sup>, Chunpeng He<sup>12</sup>, Lingzhan Xue<sup>13</sup>, Shijun Xiao<sup>14</sup>, Zhicao Yue<sup>15</sup>, Yu Jiang<sup>8</sup>, Jr-Kai Yu<sup>16,17</sup>, Erich D. Jarvis<sup>18,19</sup>, Guang Li<sup>10</sup>, Gang Lin<sup>1,7,9,†</sup>, Qiuji Zhang<sup>1,7,9,†</sup>, Qi Zhou<sup>6,5,20,21,†</sup>

1. Fujian Key Laboratory of Special Marine Bio-resources Sustainable Utilization & Fujian Key Laboratory of Developmental and Neurobiology, College of Life Sciences, Fujian Normal University, Fuzhou 350117, Fujian
2. Fujian-Macao Science and Technology Cooperation Base of Traditional Chinese Medicine-Oriented Chronic Disease Prevention and Treatment, Innovation and Transformation Center, Fujian University of Traditional Chinese Medicine, Fuzhou 350108, Fujian
3. Key Laboratory of Freshwater Fish Reproduction and Development (Ministry of Education), Key Laboratory of Aquatic Science of Chongqing, School of Life Sciences, Southwest University, Chongqing 400715, Chongqing
4. Integrative Science Center of Germplasm Creation in Western China (CHONGQING) Science City, Chongqing
5. Department of Neuroscience and Developmental Biology, University of Vienna, Vienna 1090, Vienna
6. The MOE Key Laboratory of Biosystems Homeostasis & Protection and Zhejiang Provincial Key Laboratory for Cancer Molecular Cell Biology, Life Sciences Institute, Zhejiang University, Hangzhou 310058, Zhejiang
7. The Public Service Platform for Industrialization Development Technology of Marine Biological Medicine and Product of State Oceanic Administration, College of Life Sciences, Fujian Normal University, Fuzhou 350117, Fujian
8. Annoroad Gene Technology Co., Ltd, Beijing 100180, Beijing
9. Center of Engineering Technology Research for Microalgae Germplasm Improvement of Fujian, Southern Institute of Oceanography, Fujian Normal University, Fuzhou 350117, Fujian

10. State Key Laboratory of Cellular Stress Biology, School of Life Sciences, Xiamen University, Xiamen, Fujian 361102, Fujian
11. Institute of Oceanography, Minjiang University, Fuzhou 350108, Fujian
12. State Key Laboratory of Bioelectronics, School of Biological Science and Medical Engineering, Southeast University, Nanjing 210096, Jiangsu
13. Aquaculture and Genetic breeding laboratory, Freshwater Fisheries Research Institute of Fujian, Fuzhou 350002, Fujian
14. College of Plant Protection, Jilin Agricultural University, Changchun 130118, Jilin
15. Department of Cell Biology and Medical Genetics, Carson International Cancer Center, and Guangdong Key Laboratory for Genome Stability and Disease Prevention, Shenzhen University School of Medicine, Shenzhen 518060, Guangdong
16. Institute of Cellular and Organismic Biology, Academia Sinica, Taipei 11529, Taiwan
17. Marine Research Station, Institute of Cellular and Organismic Biology, Academia Sinica, Yilan 26242, Taiwan
18. Laboratory of Neurogenetics of Language, The Rockefeller University, New York 10065, New York
19. Howard Hughes Medical Institute, Chevy Chase, Maryland 20815, Maryland
20. Center for Reproductive Medicine, The 2nd Affiliated Hospital, School of Medicine, Hangzhou 310052, Zhejiang
21. Evolutionary & Organismal Biology Research Center, School of Medicine, Zhejiang University, Hangzhou 310058, Zhejiang

Luohao Xu: [luohaox@gmail.com](mailto:luohaox@gmail.com)

Gang Lin: [lgffz@fjnu.edu.cn](mailto:lgffz@fjnu.edu.cn)

Qiuqing Zhang: [qjzhang@fjnu.edu.cn](mailto:qjzhang@fjnu.edu.cn)

Qi Zhou: [zhouqi1982@zju.edu.cn](mailto:zhouqi1982@zju.edu.cn)

**This PDF file includes:**

Figures S1 to S45  
Tables S1 to S9  
Legends for Datasets S1  
SI References

**Other supporting materials for this manuscript include the following:**

Datasets S1

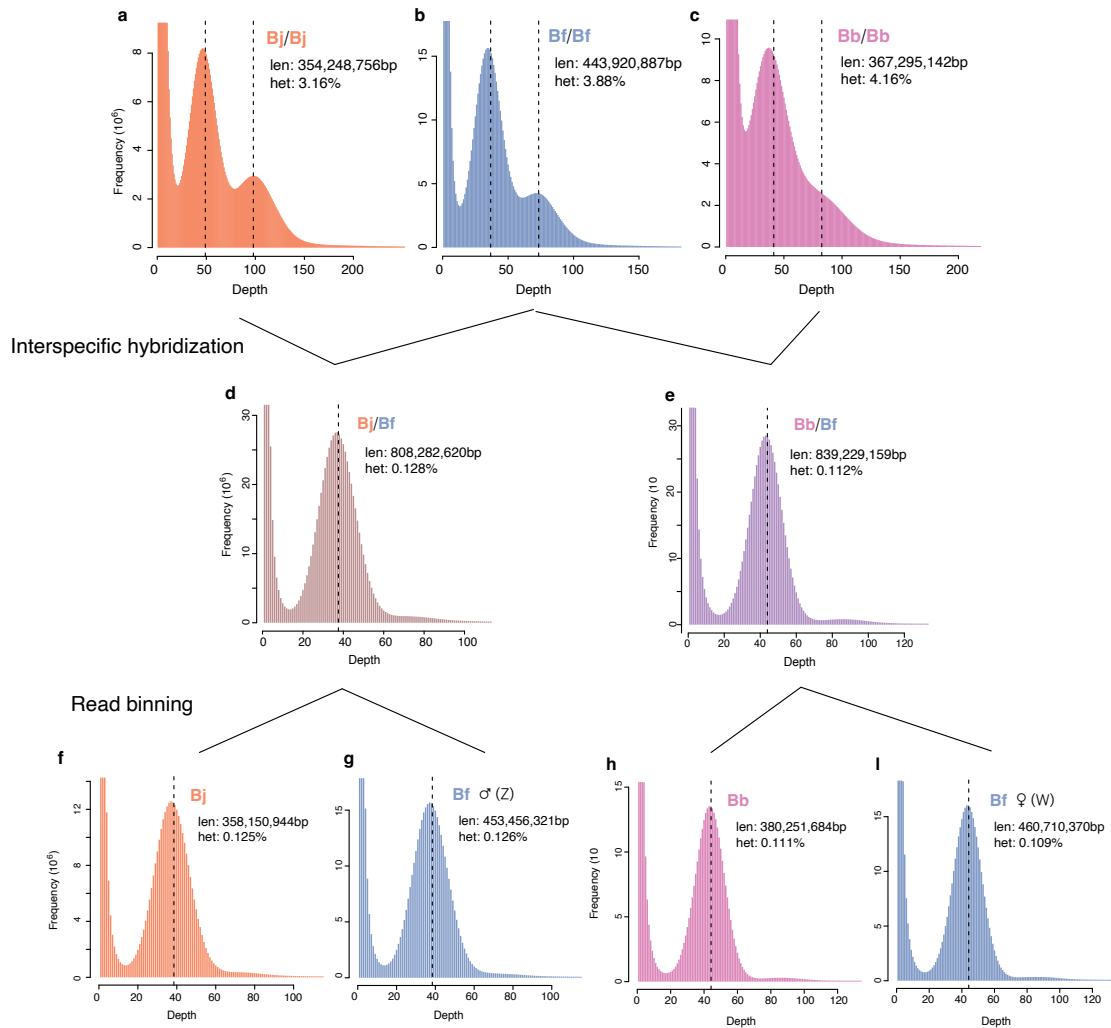

**Fig. S1. Estimation of genome size and heterozygosity levels for pure species and the hybrids.**

K-mer size of 21 was used. The distribution of k-mer counts were taken as input for genomeScope to estimate the genome size and heterozygosity of the parental species (a-c) and their hybrids (d-e). The parental species have one extra peak at the half-coverage level, suggesting the high levels of heterozygosity, while the hybrids have one single peak, suggesting the interspecific hybrid genomes are effectively haploid. After partitioning the species-specific reads from the sequencing data of the hybrids (f-i), the species-specific reads show a single haploid peak, the estimated genome size represents the haploid genome size of the pure species.

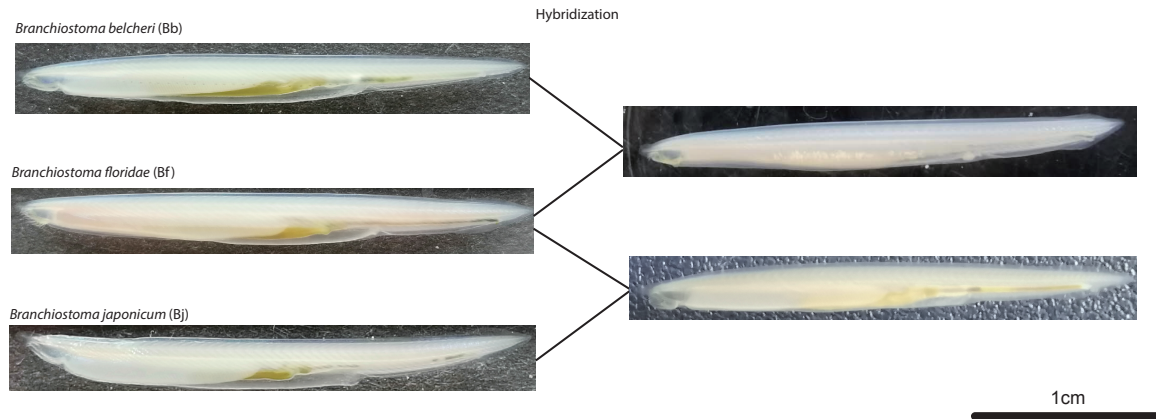

**Fig. S2. The pure species of three amphioxus species and their hybrids.**  
Photo credit: Zhen Huang, Fujian Normal University

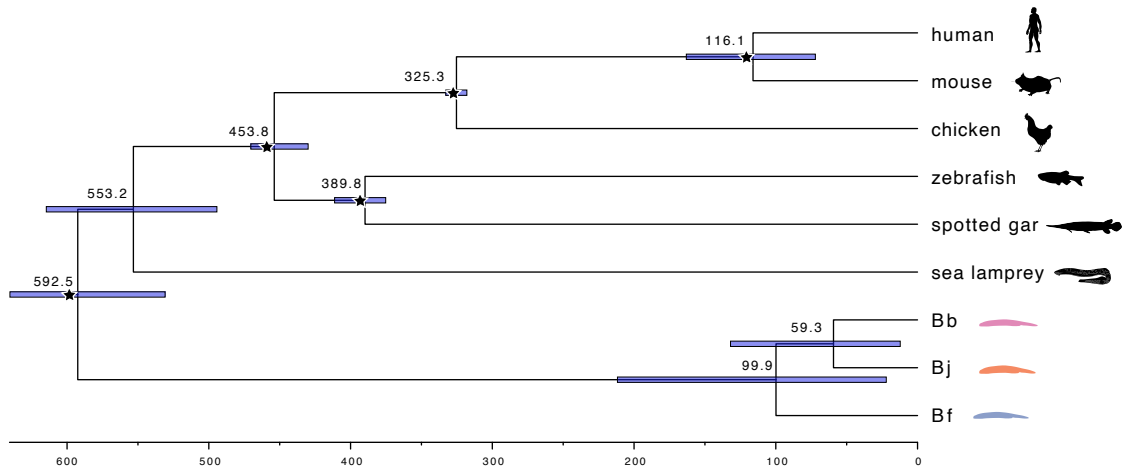

**Fig. S3. Molecular dating of amphioxus species.**

The 4-fold degenerate (4D) sites were extracted from the whole genome alignments of four vertebrates and three amphioxus species, according to the annotations of human gene models. The bars show the 95% confidence interval of divergence time. The black asterisks represent the nodes whose divergence time have been calibrated with fossil records.

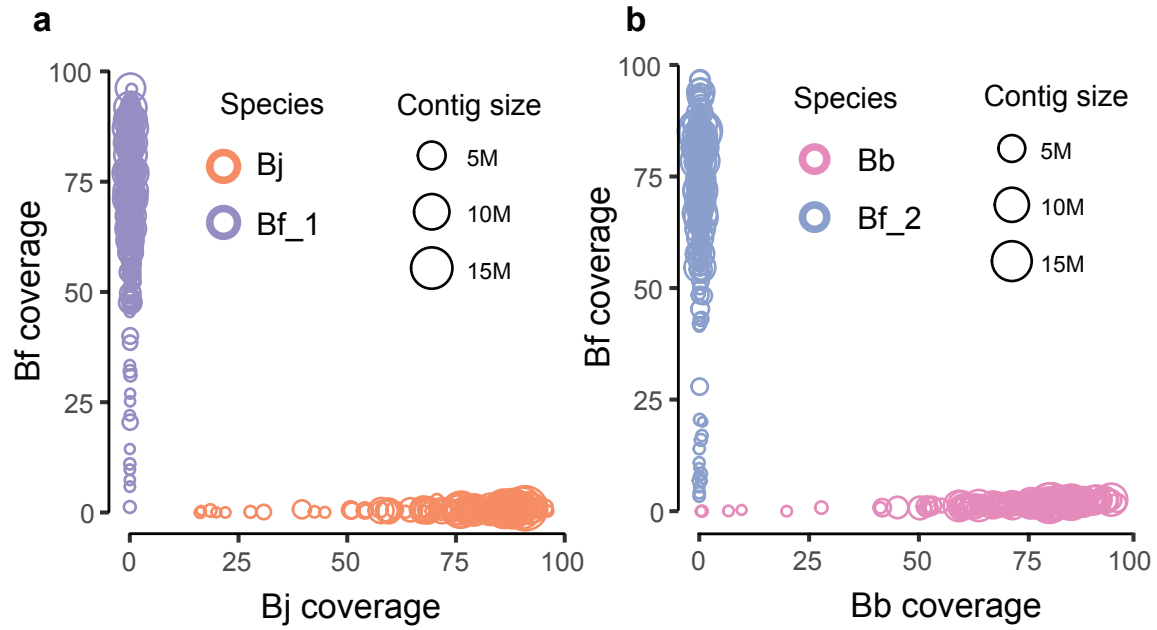

**Fig. S4. Identifying species-specific contigs from genome assembly**

a-b) Contig sequences of the hybrids were assigned to the haploid genome of each parental species, according to their coverage (proportion of mapped sequences) mapped by the short-reads of parental species.

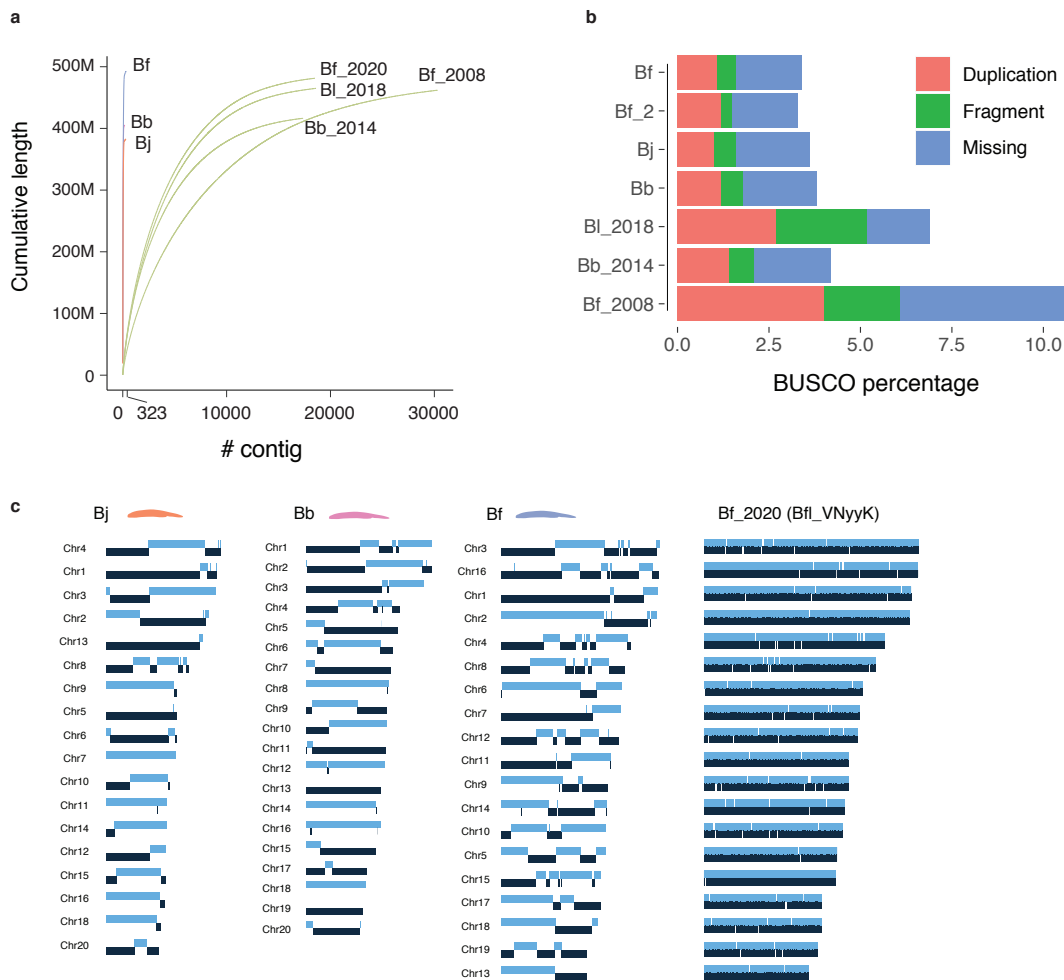

**Fig. S5. Improvement of contig length by more than 200 folds.**

a) The long-read assemblies produced in this study (Bf, Bb and Bj) have a much longer contig size than the previous short-read assemblies (Bf\_2020 GCA\_000003815.2, Bf\_2008 GCA\_000003815.1, BI\_2018 GCA\_900088365.1, Bb\_2014 GCA\_001625305.1). The long-read assemblies have a small contig number (maximum 323), while the short-read assemblies contain at least 16,000 contigs.

b) Percentage of BUSCO genes of the duplication, fragment and missing categories. Our new genome assemblies tend to have a lower percentage for those genes.

c) The distribution of contigs on the chromosomes. The dark and light blue blocks represent contigs. Bf\_2020 (Bfl\_VNyyK) refers to the Bf genome published by(1)

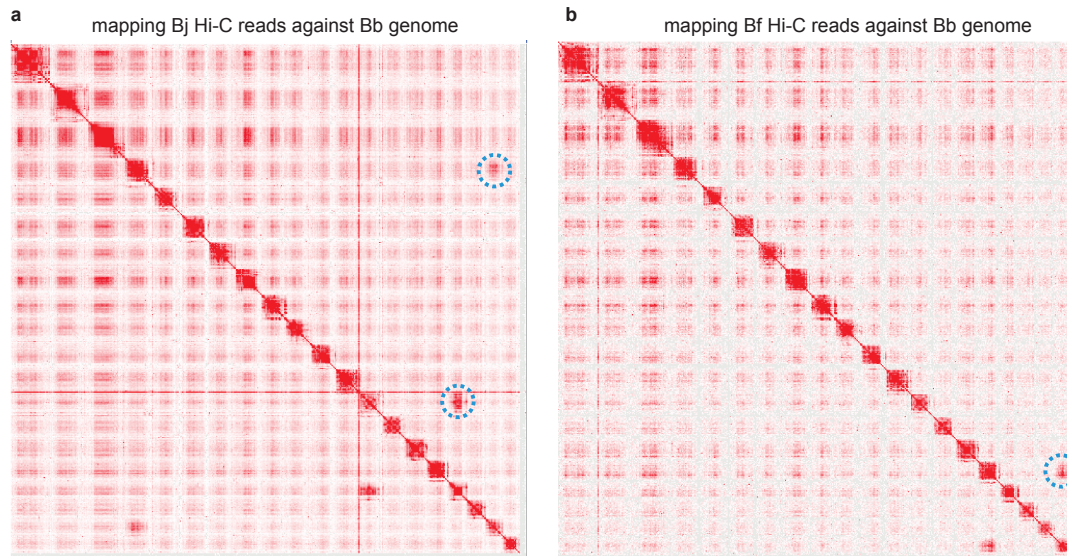

**Fig. S6 Chromosome fusions verified by the Hi-C data.**

We mapped the Hi-C data of Bj (a) and Bb (b) Hi-C sequencing data against the Bb reference genome. a) In Bj, strong inter-chromosome interactions between chr4 and chr19, and between chr13 and chr17, were highlighted by blue dashed circles. b) In Bf, chr16 and chr20 were found to have strong inter-chromosome interaction (blue dashed circles), consistent with the comparison between chromosome assemblies of Bb and Bf.



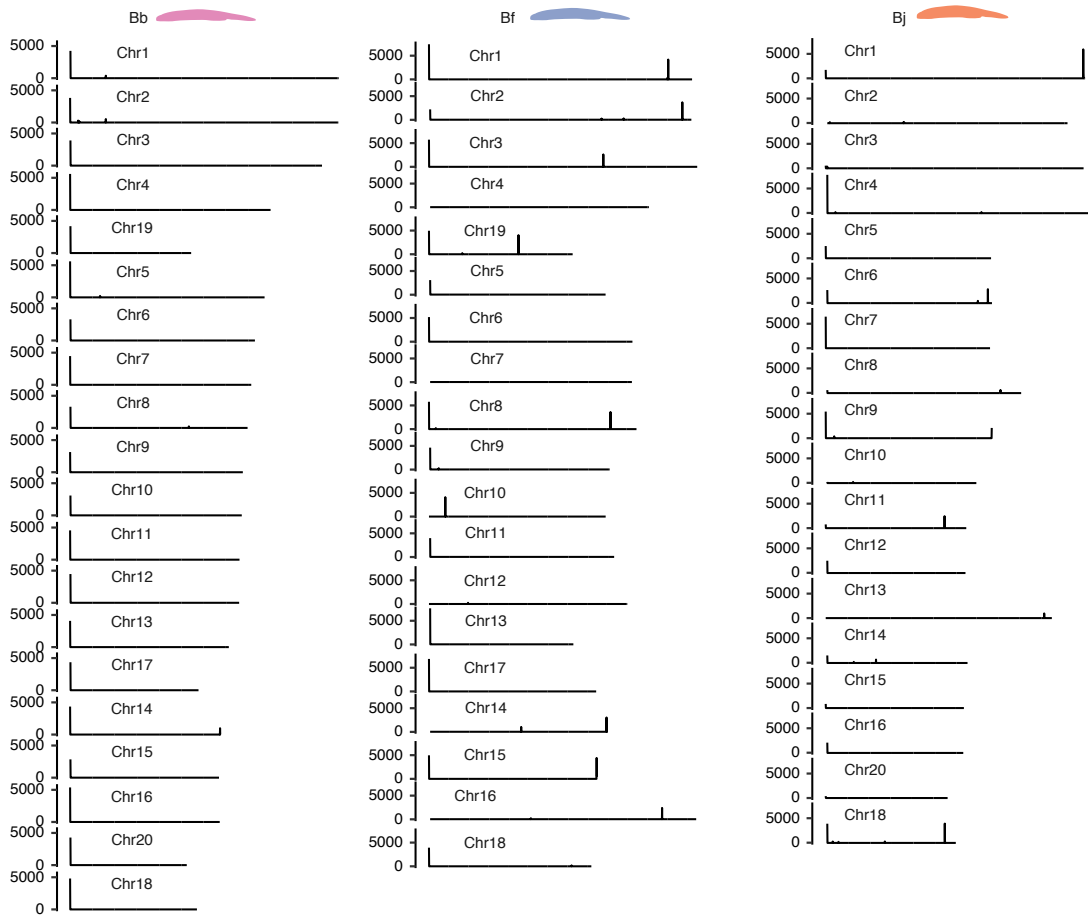

**Fig. S7. The distribution of telomere repeats along the chromosomes.**

The positions of the telomere repeats (GGGTTA)<sub>n</sub> were annotated with RepeatMasker. The lengths of the telomere repeats were summed up in every 5 kb window along the chromosomes were plotted. On most chromosomes the telomere repeats are enriched at one chromosome end.

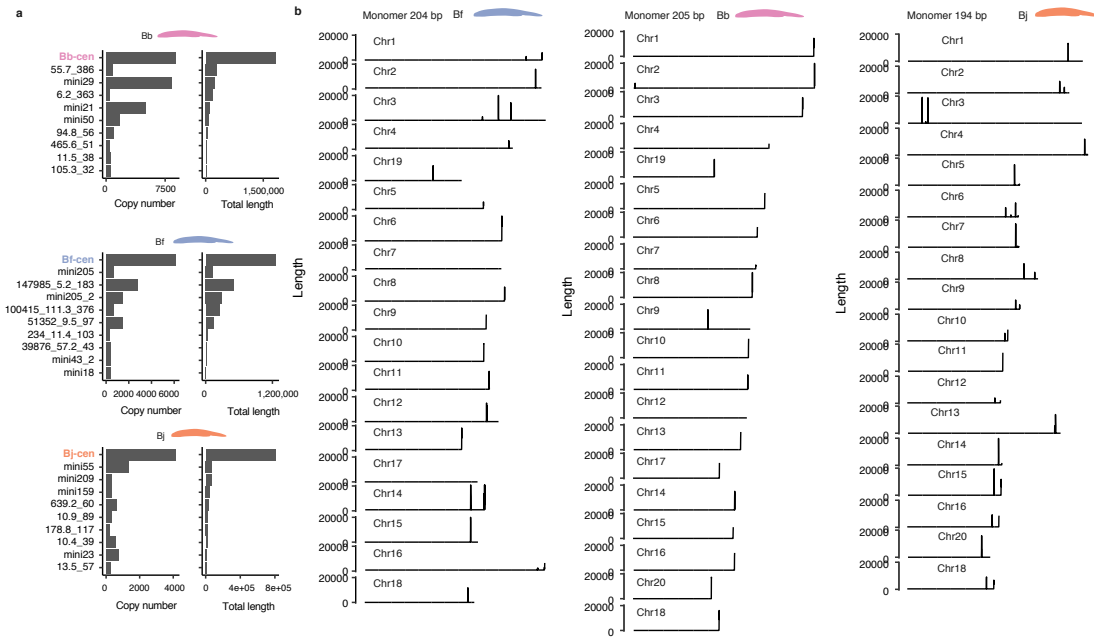

**Fig. S8. The identification and distribution of centromeric repeats.**

a) The copy number and total lengths of top 10 most abundant satellite repeats. The centromeric satellite repeats (top 1, colored) have the largest copy numbers and longest total lengths.

b) The length of centromeric repeats were summed up in every 20 kb window and plotted along the chromosomes. In most cases, the centromere repeats appear as a single locus on the chromosomes.

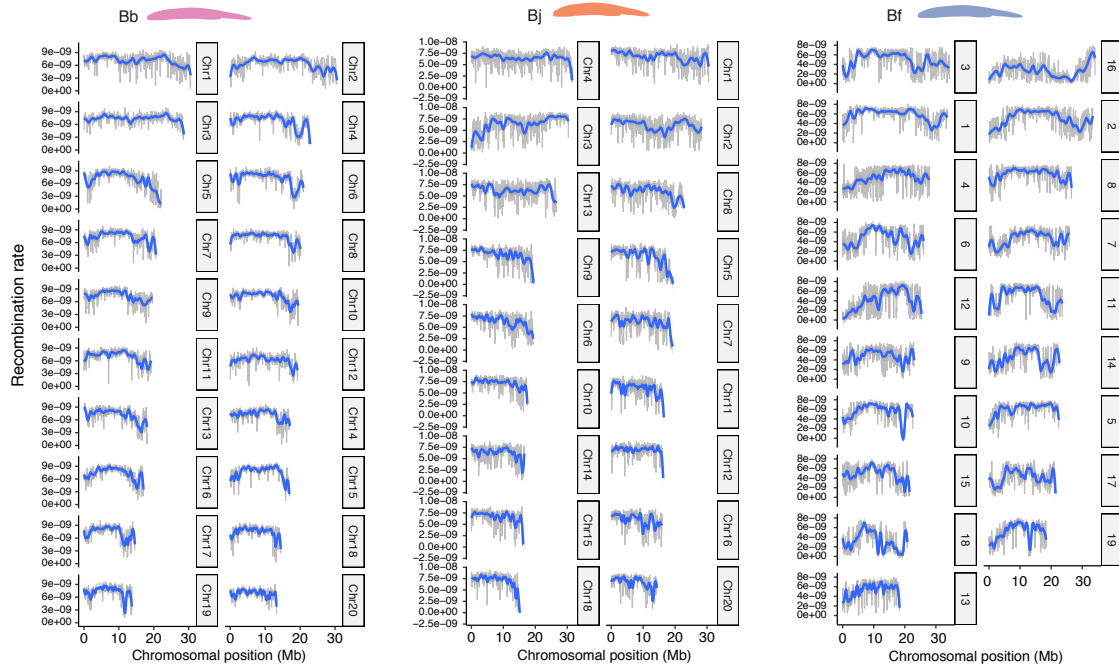

**Fig. S9. The low levels of recombination rate at centromeric and pericentromeric regions.**

The recombination rates were estimated with the ReLERNN pipeline, using the genome-wide population data. The grey lines show the original estimates while the blue lines show the smoothed means. In most chromosomes the recombination rates tend to be lower in the regions towards the 3' ends where the centromeres are located.

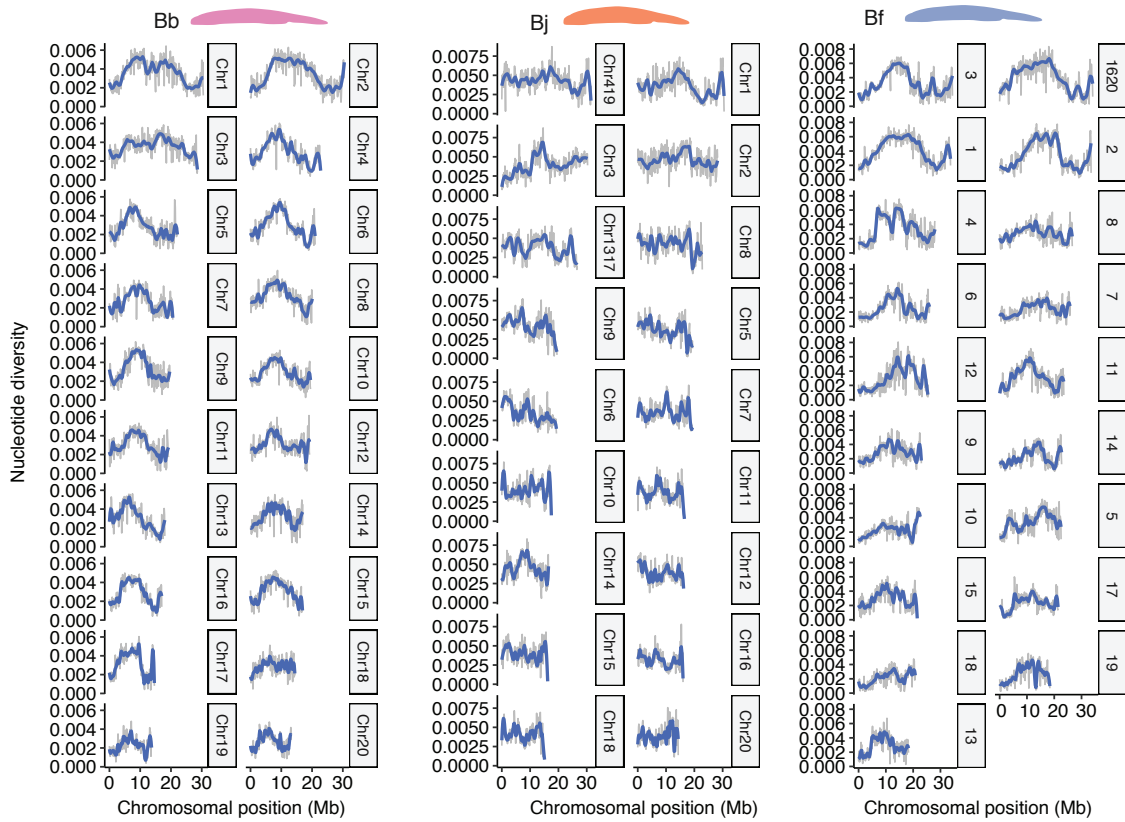

**Fig. S10. The low levels of nucleotide diversity at centromeric and pericentromeric regions.**

The nucleotide diversity ( $\pi$ ) was estimated using the same population data as in Supplementary Fig. S7. We used VCFtools to estimate the nucleotide diversity in 100 kb windows. The  $\pi$  values tend to drop near the regions close to the 3' ends of the chromosomes.

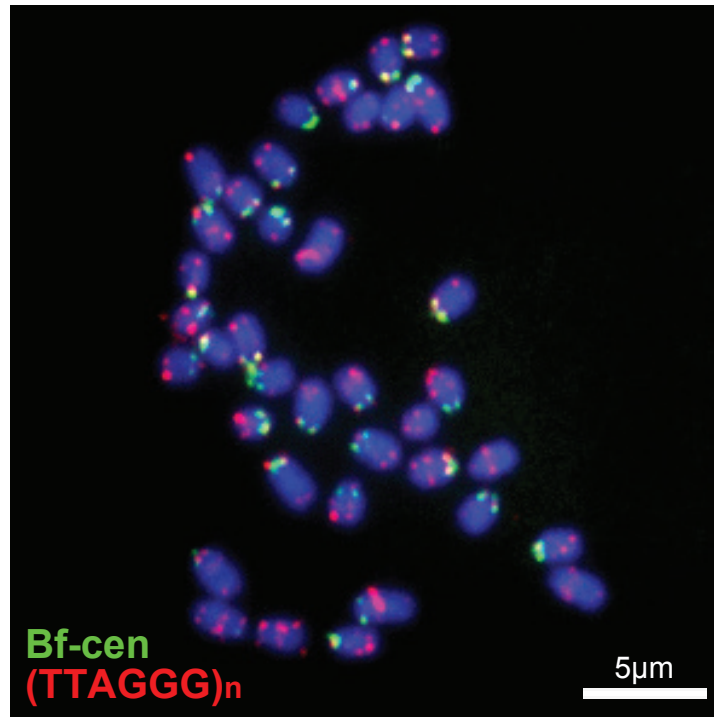

**Fig. S11. Fluorescent in situ hybridization (FISH) of centromere and telomere probes to Bf chromosomes.**

The 204-bp Bf centromeric monomer sequence (Bf-cen) is shown in Supplementary Fig. S10. The probe (green) is hybridized mostly to the chromosomal ends. The probe of the telomeric motif (TTAGGG)<sub>n</sub> (red) is hybridized to the other ends of chromosomes, sometimes colocalizing with the centromeric probes. On some chromosomes interstitial telomeric repeats that appear in the middle of the chromosomes are also detected.

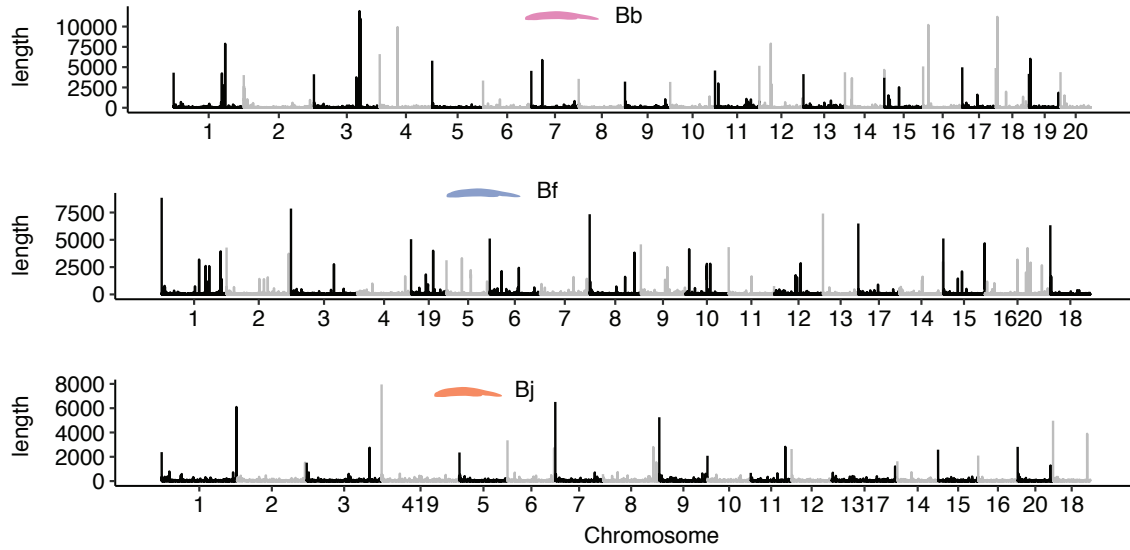

**Fig. S12. The distribution of G4 sequences along the chromosomes.**

The G4 (G-quadruplex) sites were predicted and the total lengths were summed up in every 20 kb window along the chromosomes. The peaks of G4 are often present at the ends of chromosomes, but sometimes are also seen in the middle of chromosomes.

Monomer 205 bp:

TCAGAGGGACGTAGGAATGCAAGAAAATTTTCCCGACCATTTCAAAAGAAATAGCGACTTTGTAAAA  
 TTCGCCTGTATAACGGCTTTCAGGCTCTAAATCATAGGTTTTGCACGAAAAAACCGACCAATTTTTTTTA  
 TACGTATAATGTGCGGAAATTTTTTAAAAGGTGCGGAGTATTTTTCTTGCACTTCTAACAC

Bb 

```

forward/1-205 1 TCAGAGGGACGTTAGGAATGCAAGAAAATTTTCCCGACCATTTCAAAAGAAAT 55
reverse/1-205 1 -----CGTGTTAGAAGTGCAAGAAAATTA TCTCCCGACC TTTT--AAAAAAAT 46

forward/1-205 56 AGCG- ACTTTGT-----TAAAATTCGCCTGTATAACCGGTTTCAGGCTCTA 100
reverse/1-205 47 TCCGCACATTATACGTATAAAAAAAATTTGGTCC-----GTTTTTTCTGTCGA 95

forward/1-205 101 AATCATAGCTTTTGCACGAAAAAAC-----CGACCAATTTTTTTTATACGTA 149
reverse/1-205 96 AACCTATGATTTAGAGCCTGAAACGCGTTATACAGGCGAATTTT-----AA 141

forward/1-205 150 TAATGTGCGGAAATTTTTTT--AAAAGGTGCGGAGTATTTTTCTTGCACTTCTAA 202
reverse/1-205 142 CAAAGT-CGCTATTTCTTTTGGAAATGGTCCGGAAAAATTTTTCTTGCACTTCTAA 195

forward/1-205 203 CAC----- 205
reverse/1-205 196 CGTCCCTCTG 205
  
```

Monomer 204 bp:

AATGCCATTGGTAATGCATTAGACACGATAATTCGCTCAAAACATAAGATTAGGCCCTTTTCAGCCGTTCTGCG  
 CTTACTACGAACCTTGGCATTAAAAATCGAGTTTTGATCAAAAGATTTTTCTTTTATTGATTCTAACATGCTACTAAG  
 TGTATTTACCTTATAAAAGTGTGAGAACGTGAAAAAAAAGTTTTGAAAA

Bf 

```

forward/1-204 1 AATGCCATTGGTAATGCATTAGACACGATAATTCGCTCAAAACATAA 48
reverse/1-204 1 -----TTTTCAAAACTT-----TTTTTTTCACGTTCTGA 29

forward/1-204 49 GATTTAGGCCCTTTTCAGCCGTTCTGCGCTTACTACGAAC- TTTGCCA 95
reverse/1-204 30 CACTT-----TTATAAGGTGAAATACACTTAGTAGACATGTTTAGAA 71

forward/1-204 96 TTAAAAATCGAG--TTTTGATCAAAAGATTTTTCTTTTTGATTTCTAAAC 141
reverse/1-204 72 TCAAAAAGAAAATCTTTGATCAAAA--CTCGATTTTTAATGGCAAA- 116

forward/1-204 142 ATGCTACTAAGTGTATTTACCTTATAA-----AAGTGTGAGAACG 183
reverse/1-204 117 GTTCGTAGTAAGCGCAGAACGGCTGAAAAAGGGCCTAAATCTTATGTT 164

forward/1-204 184 TGAAAAAA-----AAACTTTTGAAAA----- 204
reverse/1-204 165 TGAGCGAAATTATCGTGTCTAATGCATTACCAATGGCATT 204
  
```

Monomer 194 bp

CATACCTTTTAGCGAAAATTAACCGTCCCATGATAATACACGTACAATTTCTTTGGTGATATAAGCTCGAAATAG  
 CGTTATAACGTTTCGGGGACGTTTCTAAGCATATTGACGTGTAGAGTGAATAGAAGCATTGGTAACCTTTGTGCT  
 GATTTGGGTTCAAAATGCCAAACGGAGCCCTAAA

Bj 

```

forward/1-194 1 CATA-----CCTTTTAGCG-----AAAATTAAC----CGTCCCATGATAAT- 39
reverse/1-194 1 TTTAGGGCTCCGTTTGGCATTTTGAACCCAAAATCAGCACAAAGTTACCAATGCTTCTA 59

forward/1-194 40 -----ACACGTACAATTTCTTTGGTGATATAACCTCGCAAATAGCGTTATA 87
reverse/1-194 60 TTACACTTCTAACACGTACAATATGCTTAGG-----AACTCCCGA--AACGTTATA 111

forward/1-194 88 ACGT--TTGGGACGTTT-----CCTAAGCATATTGTACGTTTAGAAGTGTAATAGA 139
reverse/1-194 112 ACGCTATTTGCGAGCTTATATCACAAAAGAAAATTGTACGT-----TATT 158

forward/1-194 140 AGCATTGGTAACTTTGTCTGATTTGGGTTCAAAATGCCAAACGGAGCCCTAAA 194
reverse/1-194 159 ATCAATGGGGAC----GGTTAATTT-----CGCTAAAAGG-----TATG 194
  
```

**Fig. S13. The centromeric repeat monomer.**

The sequences of the centromeric repeat monomer are shown at the top of each panel. The monomers are not homologous among amphioxus species. For each monomer, the reversed complementary sequence (labelled as reverse) was generated and aligned with the original (labelled as forward) monomer. The dark blue highlights the identical nucleotides between the forward and reverse monomer.

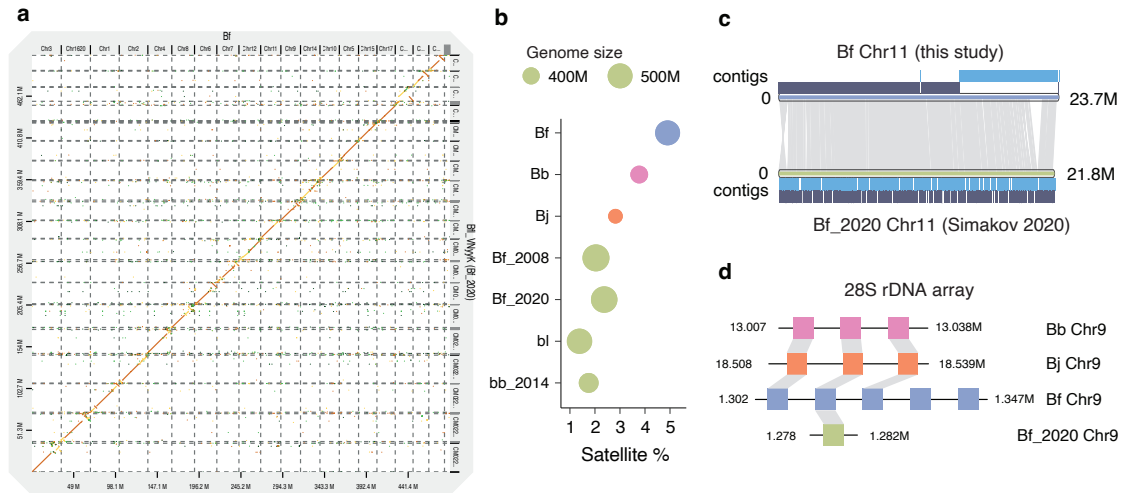

**Fig. S14. Complex genomic regions of amphioxus species have been assembled by long-reads.**

- a) Chromosomal synteny between our new Bf assembly and Bf\_VNyyK (Bf\_2020).
- b) In the long-read assemblies, the satellite sequences comprise a larger portion of the genome because more satellite sequences were assembled, compared to the previously published genomes. The circle size represents the genome size. The larger genomes have a higher portion of satellite repeats.
- d) The genomic synteny of Chr11 between the long-read (Bf) and the published short-read (Bf\_2020) assemblies. The grey bands represent syntenic blocks. The short-read assembly missed one large sequence fragment at the ~20Mb position. The dark and light blue blocks represent contigs. The Chr11 of long-read assembly is comprised of only 6 contigs, while that of the short-read assembly is comprised of thousands of contigs.
- a) The gene synteny of a 28S rRNA gene array. There are 3, 3 and 5 tandem copies of 28S rRNA genes assembled in Bb, Bj and Bf long-read assemblies respectively, but only one copy was assembled in the short-read assembly of Bf.



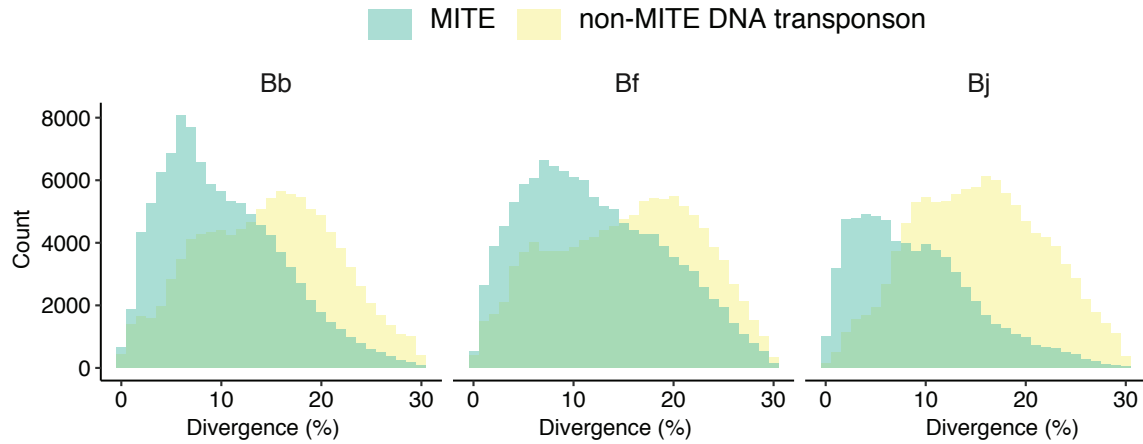

**Fig. S15. The divergence of MITE in the amphioxus genomes.**

MITE stands for Miniature Inverted-repeat Transposable Element which is a type of DNA transposons. The divergence of repeats (X-axis) were estimated by RepeatMasker. In all amphioxus species, MITEs have a lower divergence level from the consensus sequences, compared with other types of DNA transposon, suggesting more recent activities of MITEs.

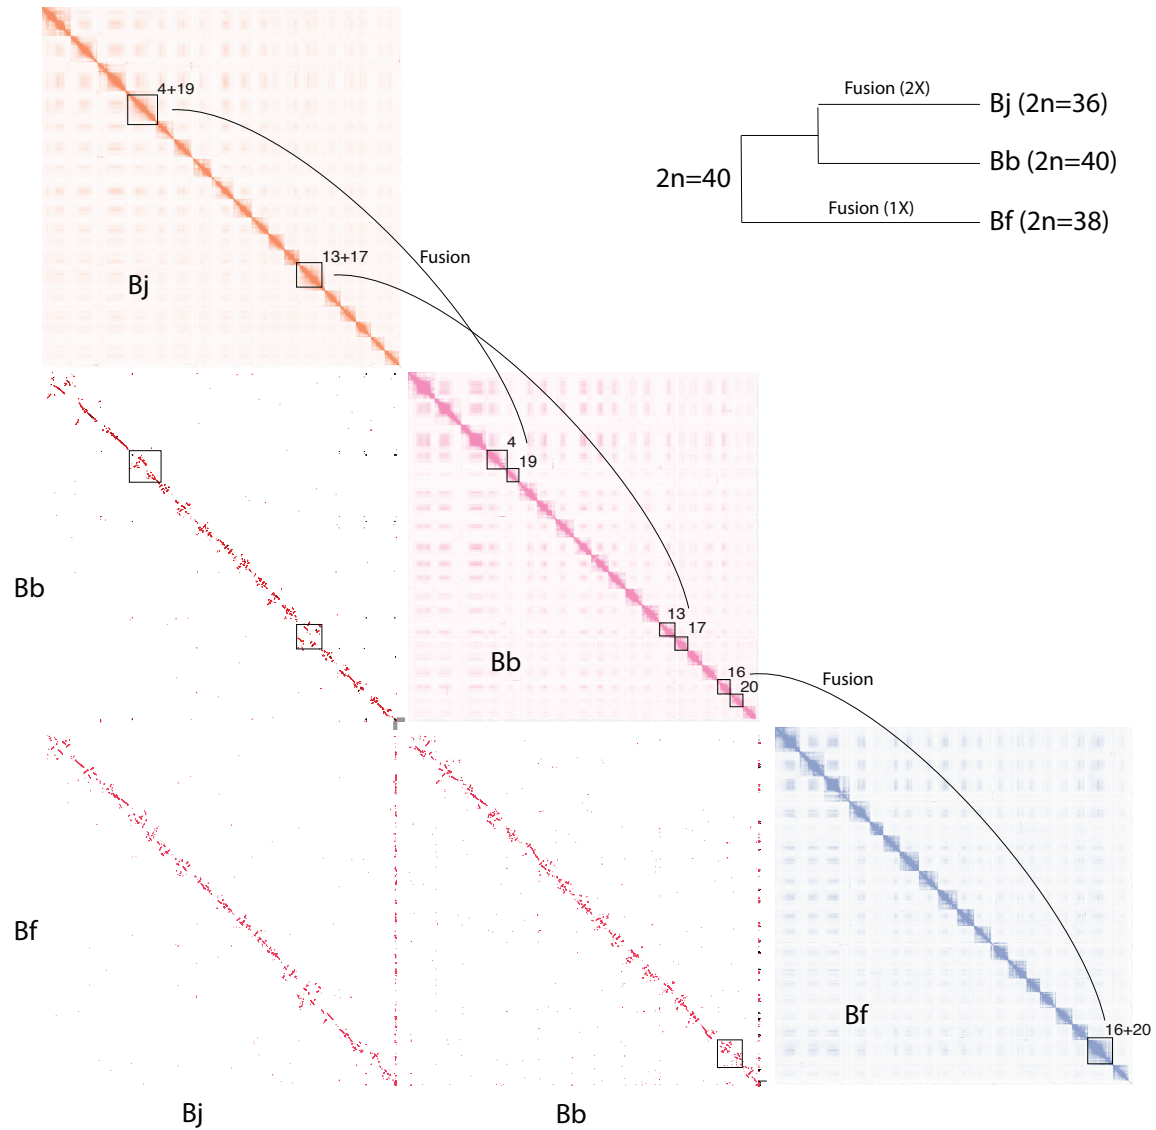

**Fig. S16. Chromosomal fusions between amphioxus species.**

The Hi-C contact maps were visualized by JuiceBox. The genome synteny between each pair of species were shown underneath the Hi-C contact maps. The synteny dot-plots were visualised using the same methods described in Supplementary Fig. S14. The squares highlight the chromosomes that involve chromosome fusions. The numbers near the highlighted chromosomes in the Hi-C maps represent the chromosome numbers.

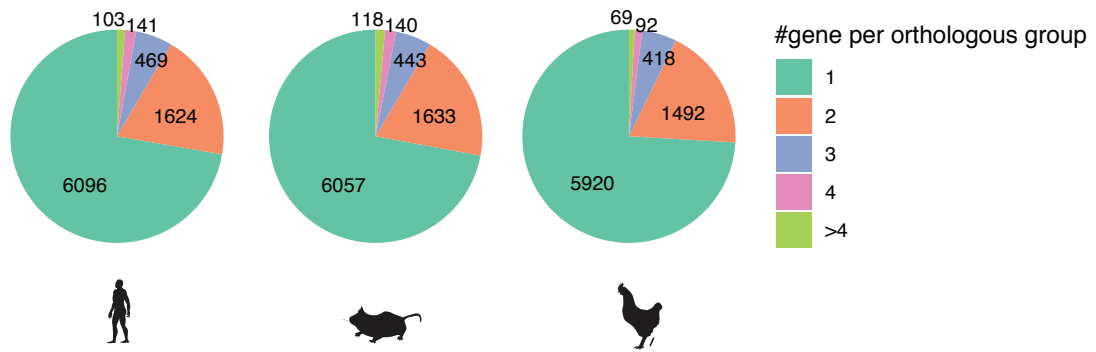

**Fig. S17. Number of genes in each orthologous group.**

The statistics was directly retrieved from the OrthoFinder result. In most orthologous gene groups the genes are single copy. When the genes are multip-copy, the gene copy number mainly ranges from two to four.

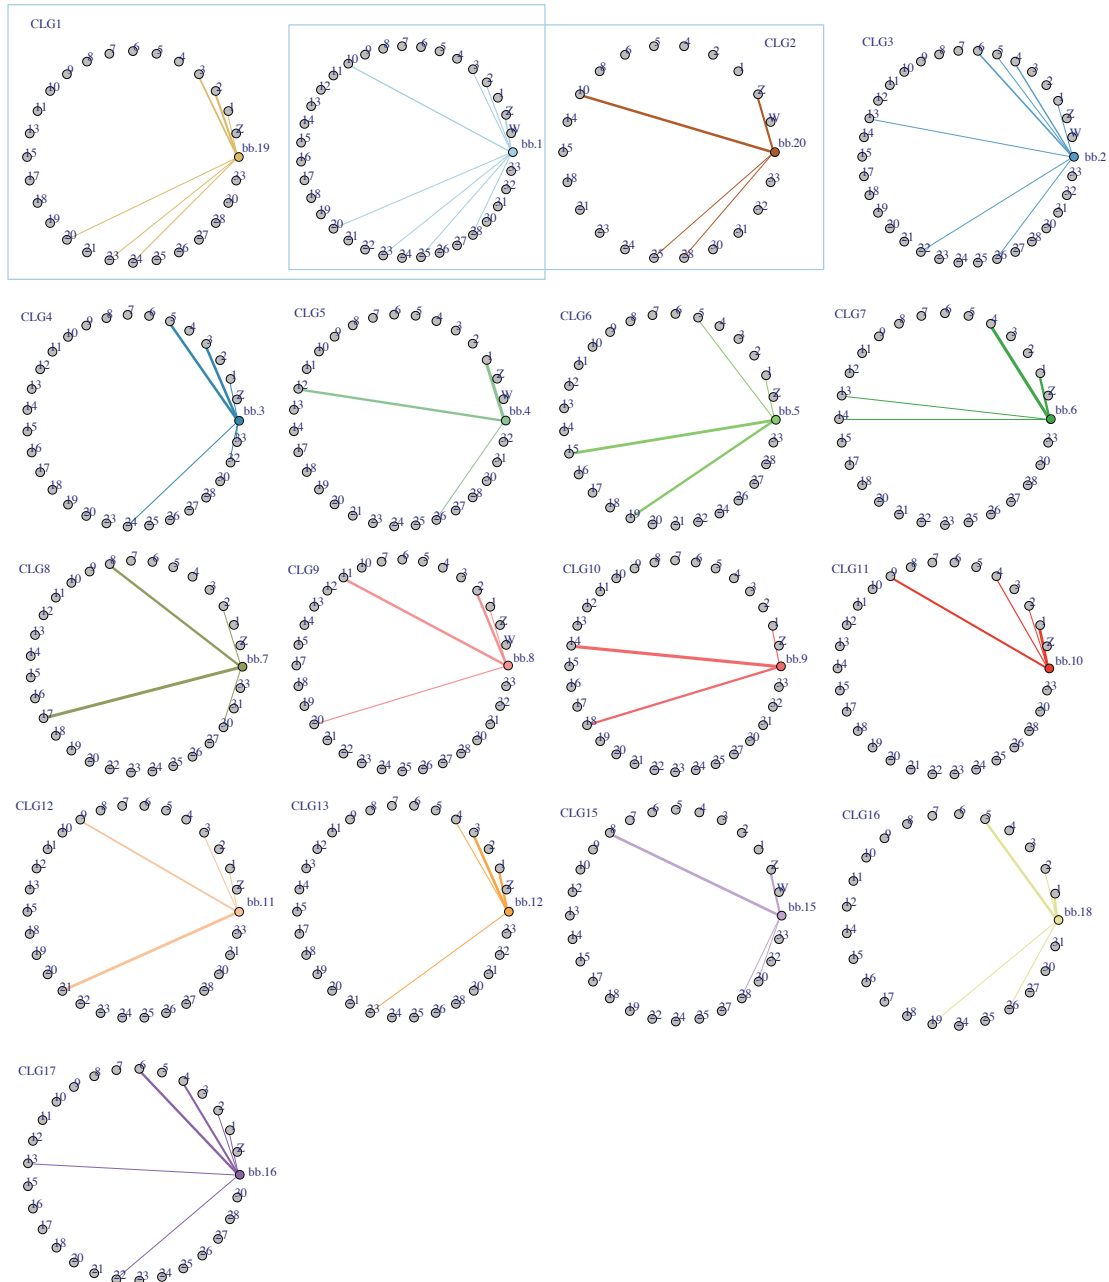

**Fig. S18. Homology between chicken and Bb chromosomes.**

Each line connecting a Bb and a chicken chromosome represents the proportion of Bb genes (Bb%) of certain Bb chromosome that is homologous to the genes of the chicken chromosome. The thicknesses of the lines indicate the Bb% values. Only the lines with Bb% values larger than 4% are shown. One Bb chromosome usually connects with three or four chicken chromosomes. Each small panel represents one Bb chromosome that represents one CLG (except for CLG1, CLG2 and CLG14). CLG14 is shown in Fig. 2b. A part of Bb chr1 (bb.1) shares the chicken homology with chr19 while the other part shares with chr20 (The blue squares represent CLG1 and CLG2 respectively, both including a part of chr1).

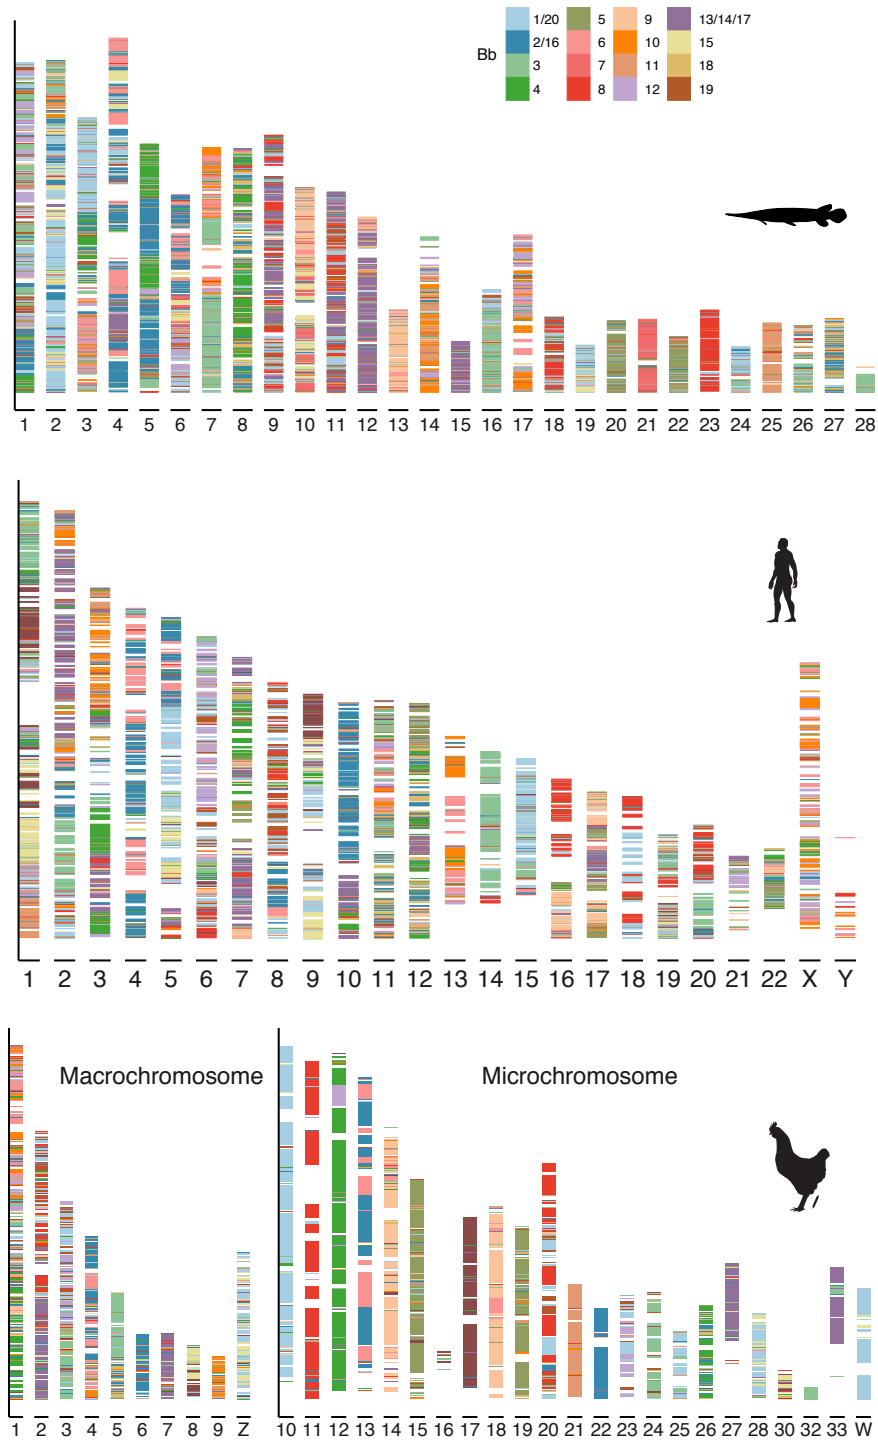

**Fig. S19. The composition of human and spotted gar chromosomes by CLG.**

The colored bands show the Bb-chicken synteny blocks. A synteny block was built when two syntenic genes are not apart from each other for longer than 5 Mb. The Bb chromosomes were translated into CLGs according to the Bb-CLG relationship (Fig. 2c).

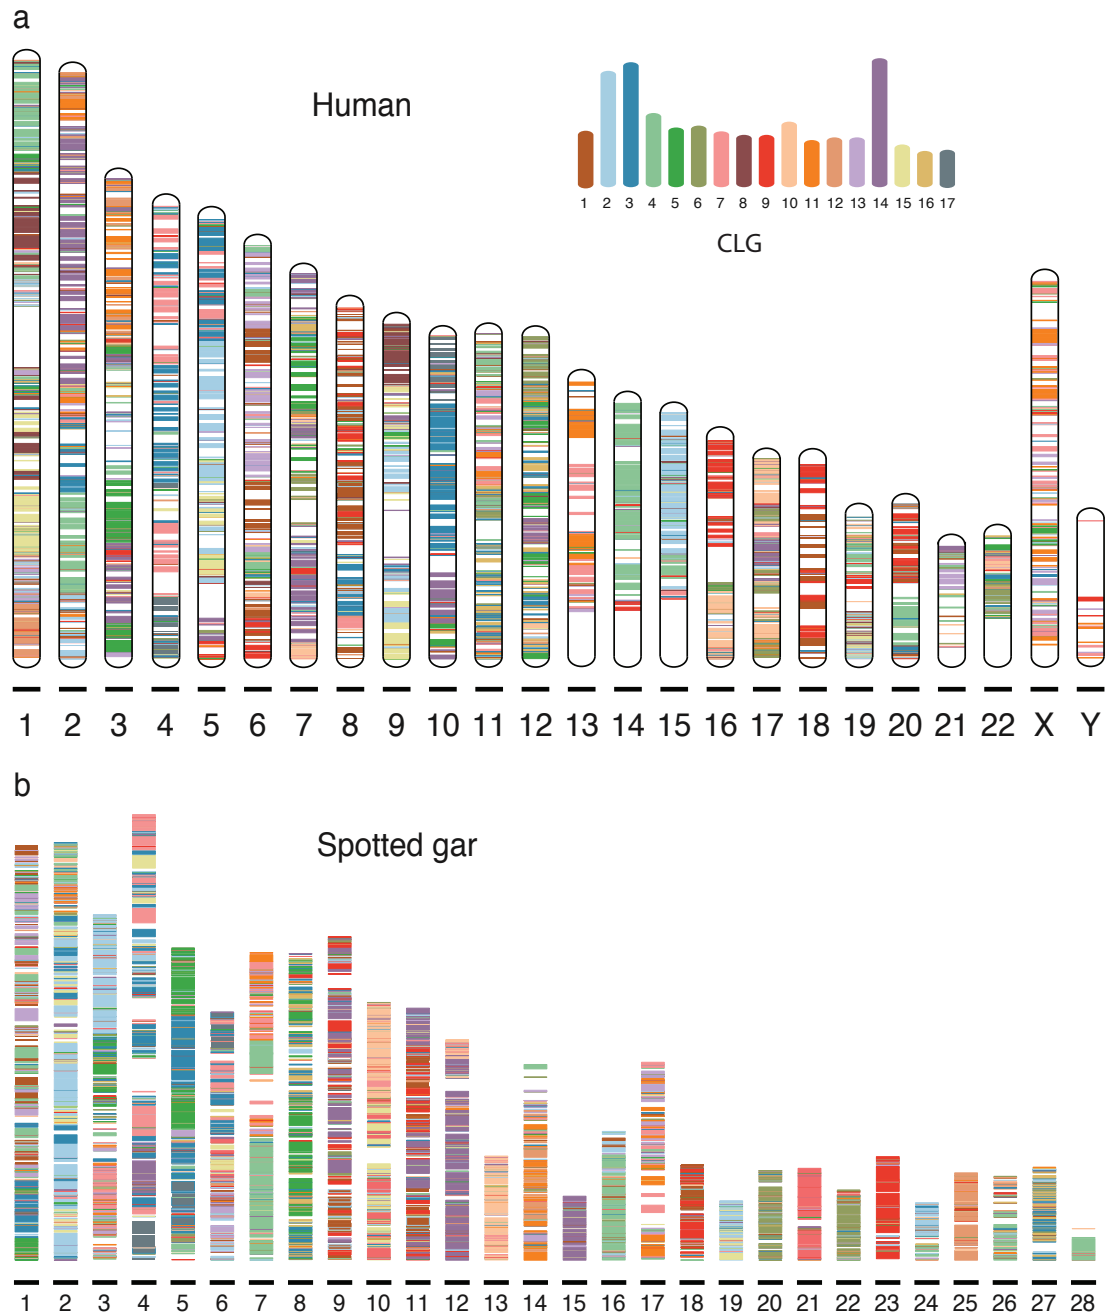

**Fig. S20. The composition of human and spotted gar chromosomes by CLGs.**

Similar to Fig. 2d, we show the homologous sequences of CLGs across the chromosomes of human and spotted gar.

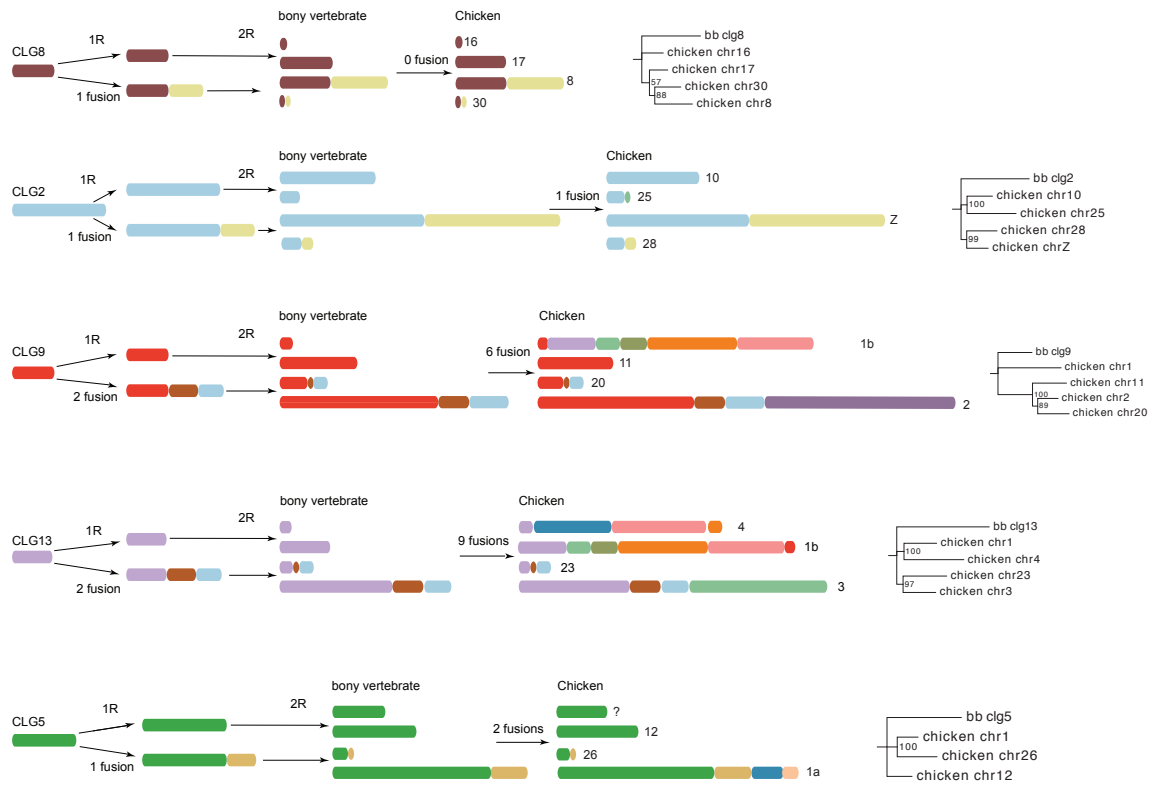

**Fig. S21. Post-1R chromosomal fusions.**

The schematic plots show the evolutionary history of five CLGs, from the chordate ancestors to extant chicken chromosomes through 1R and 2R. A chromosome block in one color represents a CLG. For all five CLGs, one duplicated chromosome fused with another duplicate chromosome after 1R. Chicken chromosome numbers are labelled at the right end of the plot. In the right panels, the phylogeny was built using the ohnolog genes of chicken, using Bb as an outgroup. The bootstrapping values are shown at the nodes. The topology of the phylogeny supports the evolutionary relationships of ohno-chromosomes inferred based on post-1R fusions.

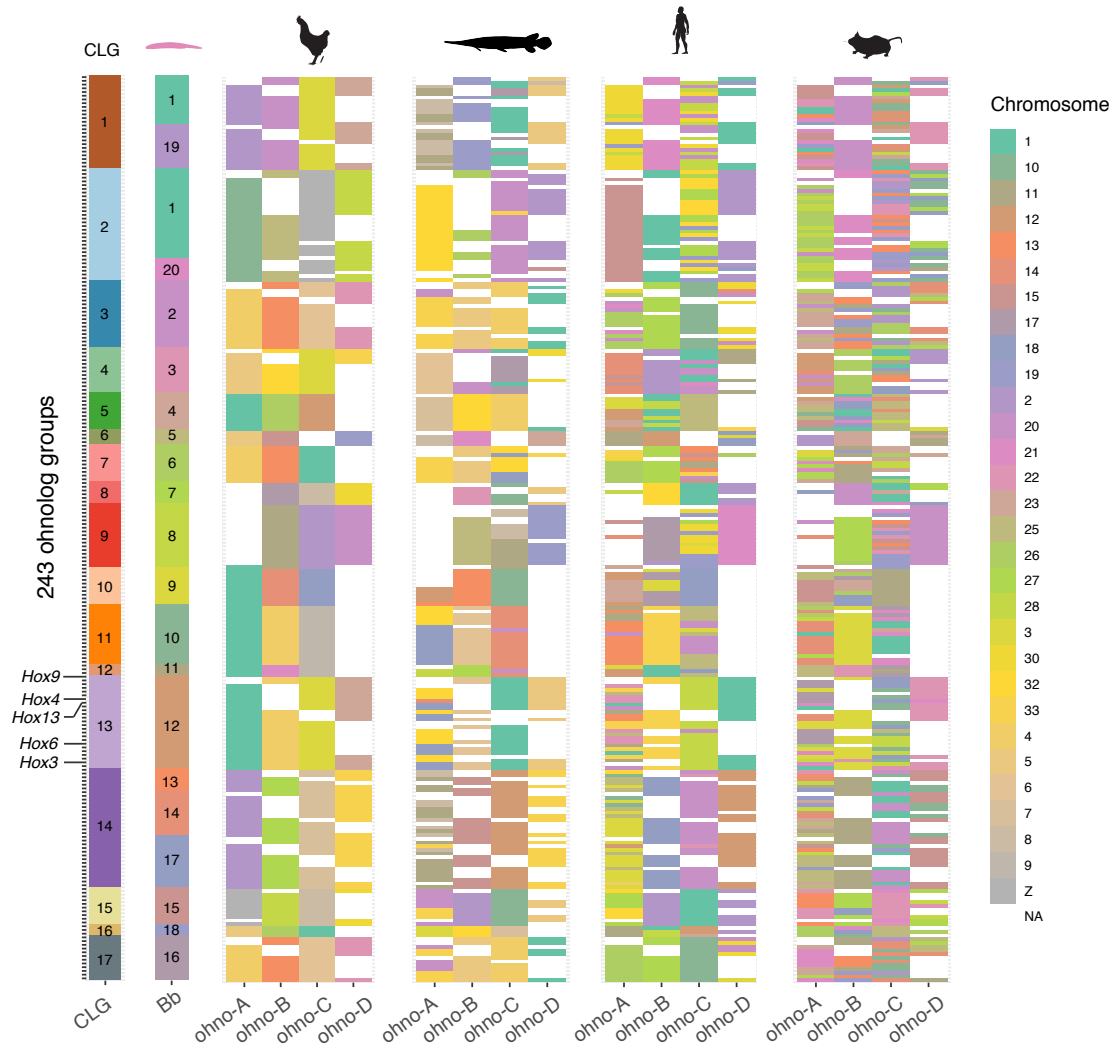

**Fig. S22. Ohnolog groups used for dating the time of 1R and 2R.**

There are 243 ohnolog groups identified that contain at least three vertebrate ohnologs. Each row represents one ohnolog group which contains one Bb gene, at least three chicken genes, 1-4 genes of spotted gar, human and mouse. The vertebrate genes of the same ohno-chromosome lineage (A/B/C/D) are homologous to each other. The IDs of CLGs and Bb chromosomes are labelled since they are clustered as large blocks, and the legend for vertebrate chromosomes was shown on the right. Five Hox genes are highlighted as examples.



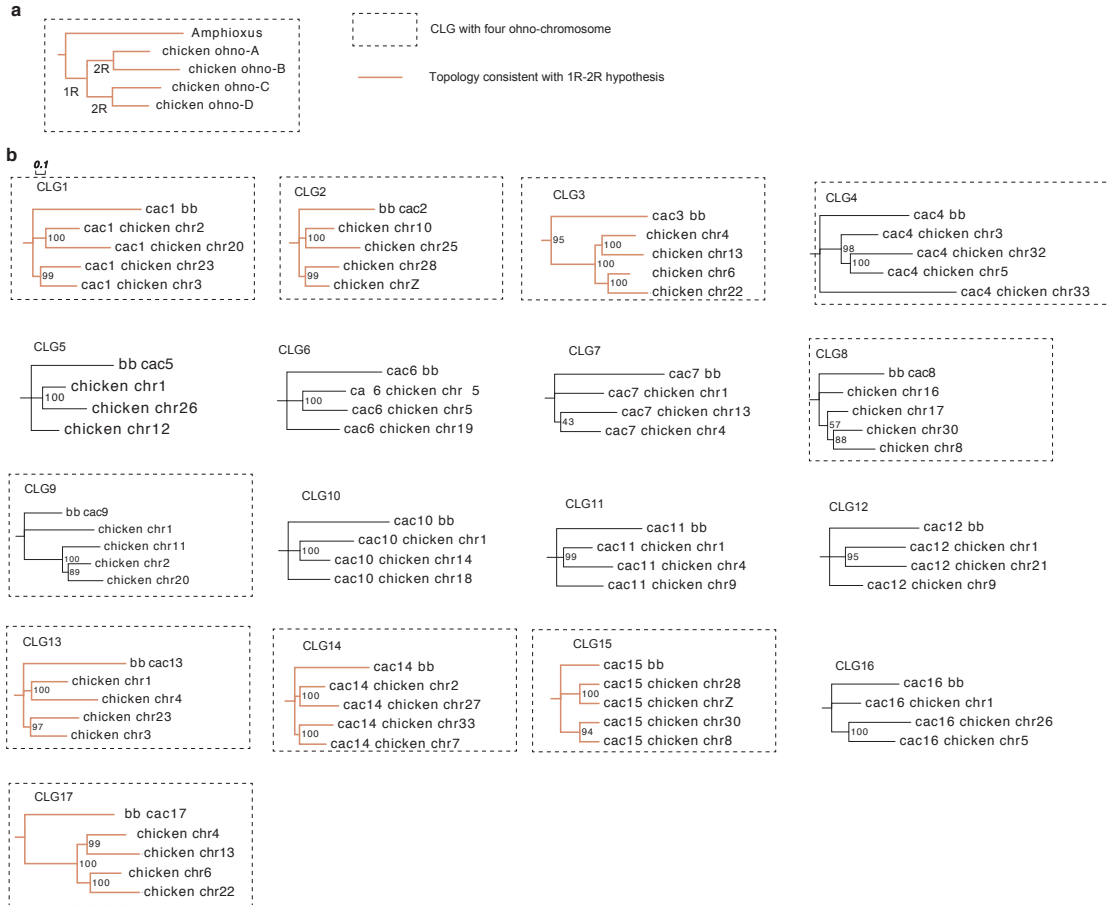

**Fig. S23. Phylogeny of ohno-chromosomes built with ohnolog genes.**

The phylogenetic trees of chicken ohno-chromosomes were built using the ohnologs gene residing on the same ohno-chromosomes. The list of ohnologs is listed after each ohno-chromosome branch. The phylogeny of the other five CLGs that experienced post-1R fusions in vertebrates is shown in Supplementary Fig. S20. The bootstrapping values are shown at the nodes.

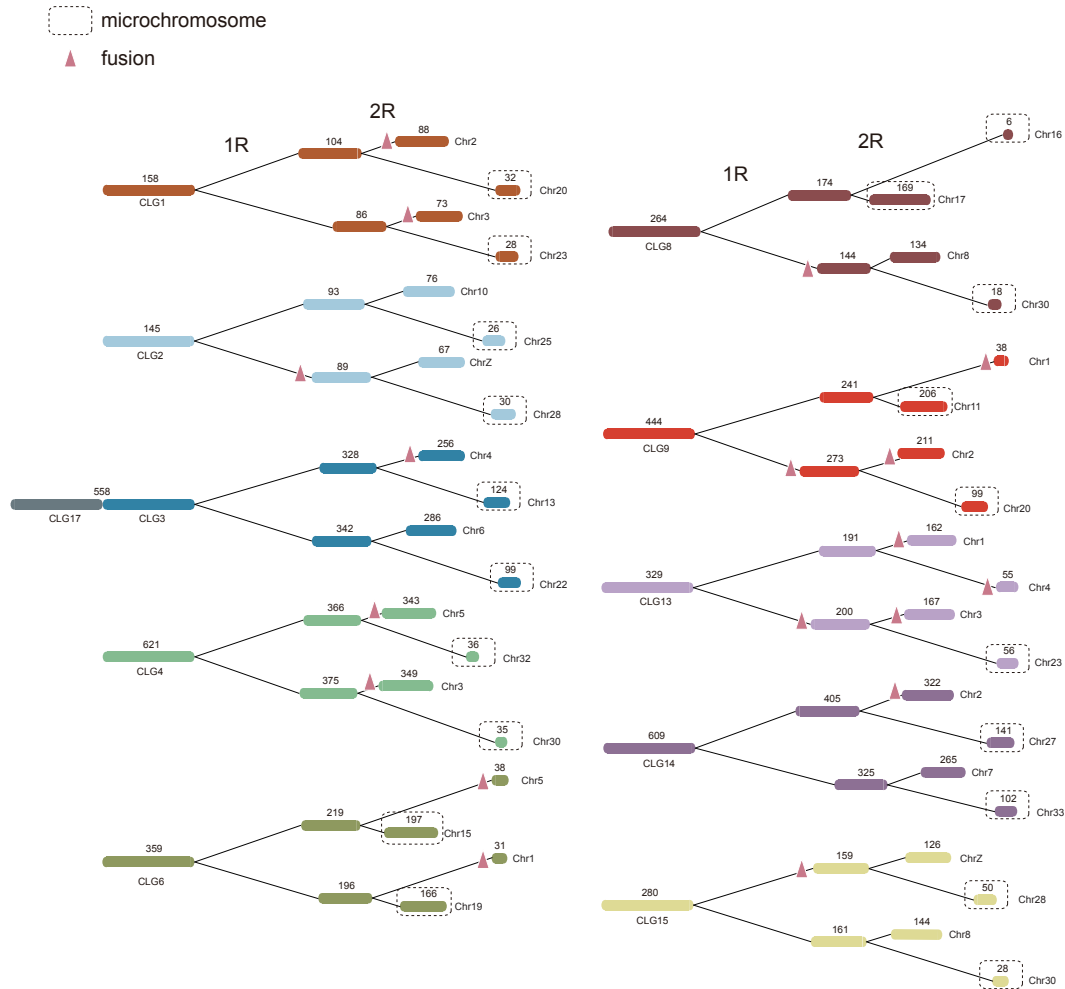

**Fig. S24. Reconstruction of gene loss events following 1R and 2R.**

The numbers above the CLGs are the original orthologous genes that have homologs in at least one descendant ohno-chromosomes. The numbers above the chicken and post-1R chromosomes show the extant and reconstructed gene numbers respectively. The branch length indicates the numbers of gene loss, i.e. a longer branch means more genes have become lost during or after WGDs in the branch. The pink triangles indicate fusion events along the branches. The microchromosomes are highlighted by dashed squares. In the branches leading to microchromosomes, no fusions have occurred, and the branches are longer (more gene loss).

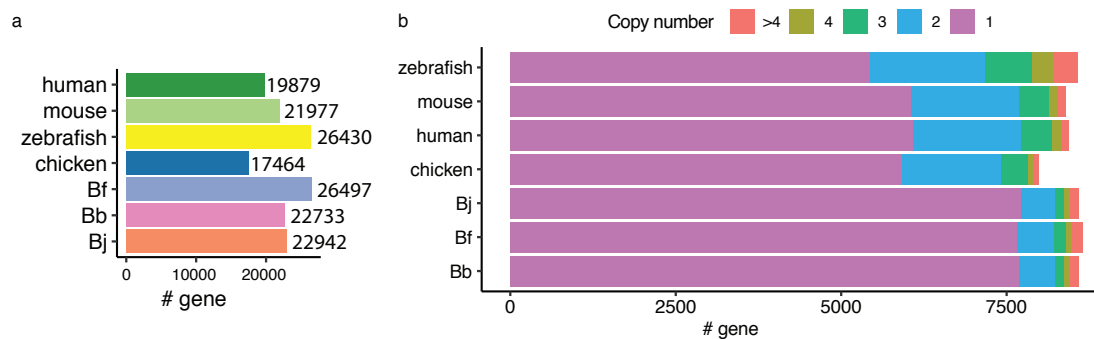

**Fig. S25. Gene number of chordate genomes.**

a) The total number of protein-coding genes of four vertebrate species and three amphioxus species. b) Statistics of gene counts in orthogroups. We included the orthologous gene groups in which at least one amphioxus gene and one vertebrate gene are present (i.e. the orthogroups are shared by amphioxus and vertebrates). Amphioxus has a larger proportion of single-copy genes, but also has a considerable amount of duplicated genes given the lack of WGDs.

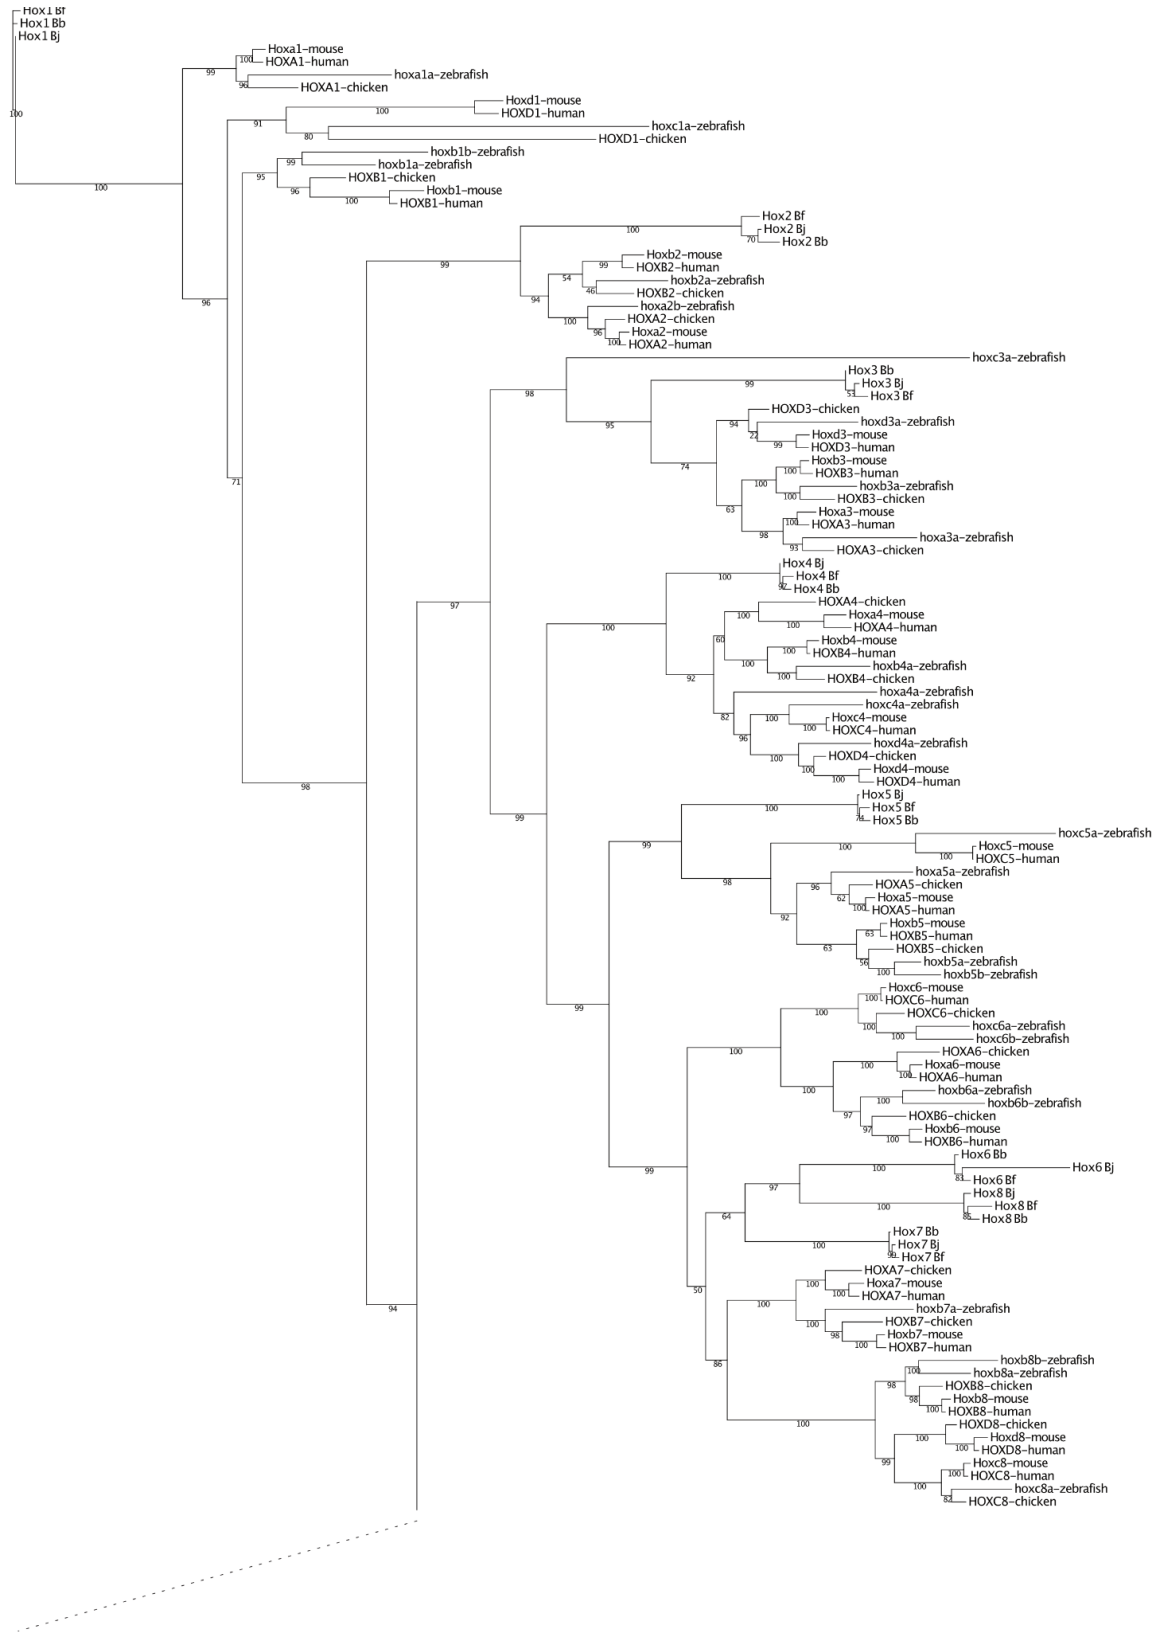

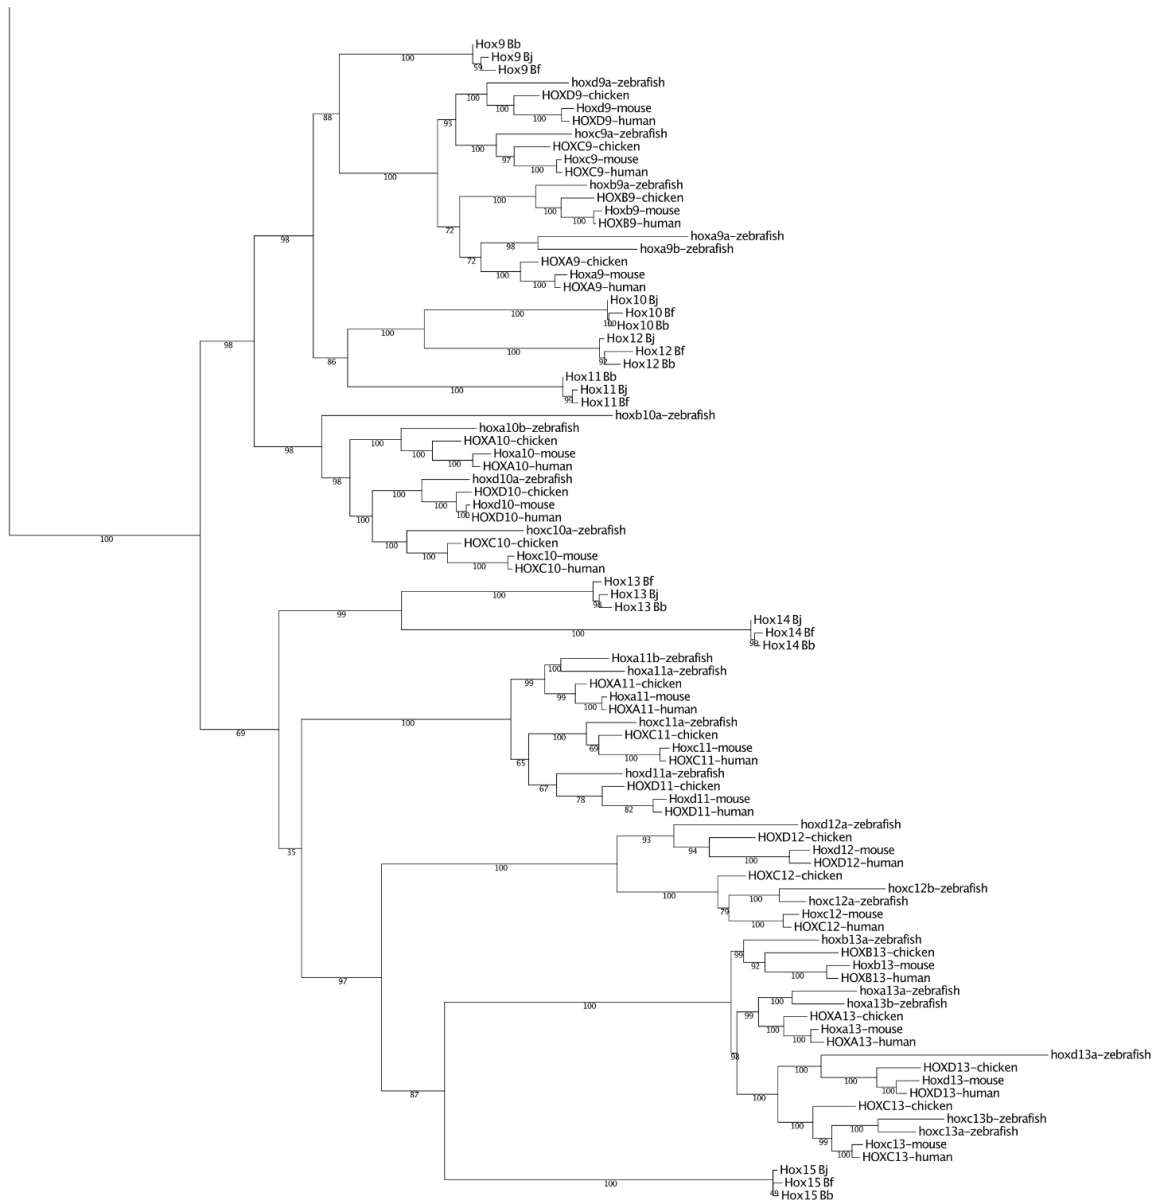

**Fig. S26. Phylogenetic tree of Hox genes.**

The homologous Hox gene group of amphioxus and vertebrates shown in rectangular mode. Numbers at the internal nodes indicate the bootstrapping value under 1000 replicates.

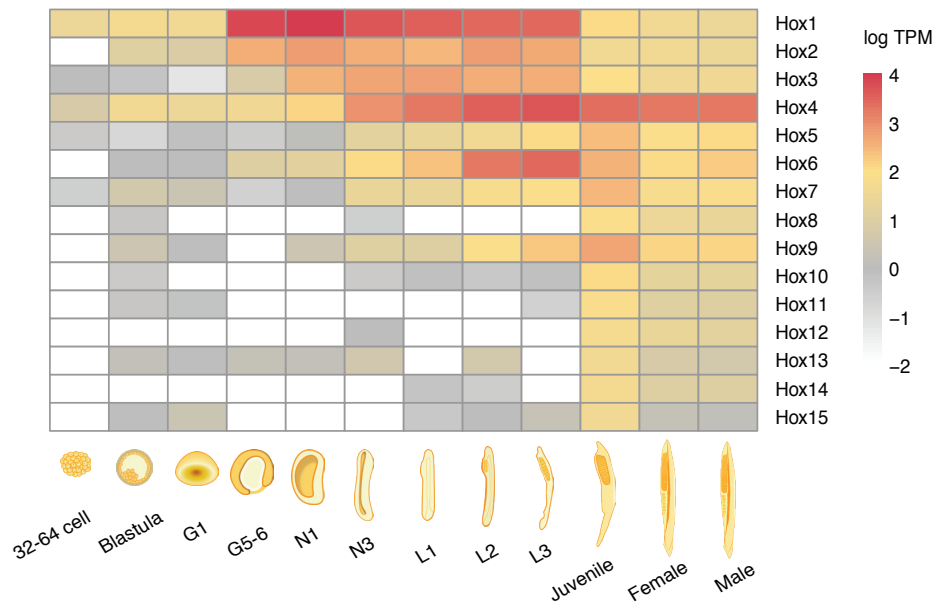

**Fig. S27. The temporal expression of Hox genes.**

The expression profile of Hox genes of Bf across 11 developmental stages. In earlier stages only anterior Hox genes are expressed, and the posterior Hox genes are generally expressed in later stages.

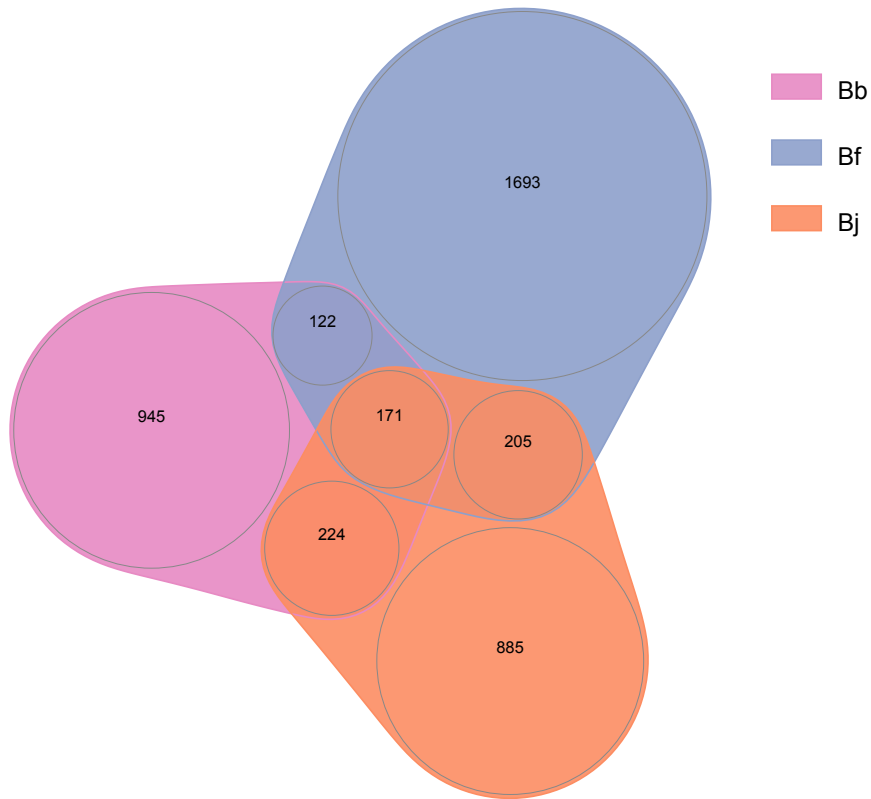

**Fig. S28. The Venn diagram of genes involved in segmental duplications of three amphioxus species.**

For those genes whose coding regions are overlapped for 60% or more of the segmental duplication regions in three different amphioxus species, we identified the orthologous genes that are shared between or specific to the three species. We found that most of the genes are unique in one of the amphioxus species, suggesting the segmental duplications in amphioxus tend to be of more recent origin.

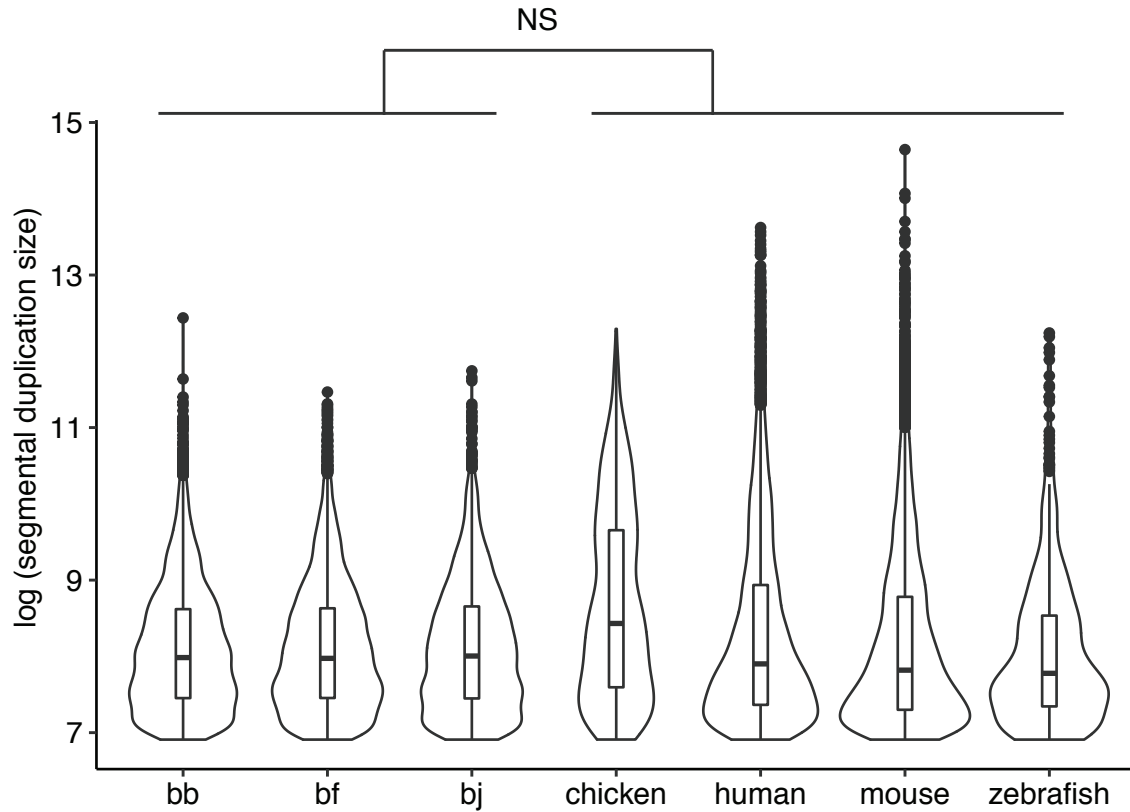

**Fig. S29. The size of segmental duplications.**

The lengths of segmental duplications of the amphioxus genomes were compared with those from the vertebrate genomes. By definition all segmental duplications studied are larger than 1 kb. The lengths of segmental duplications of amphioxus are not significantly different from those of vertebrates (Wilcoxon test,  $p > 0.05$ ).



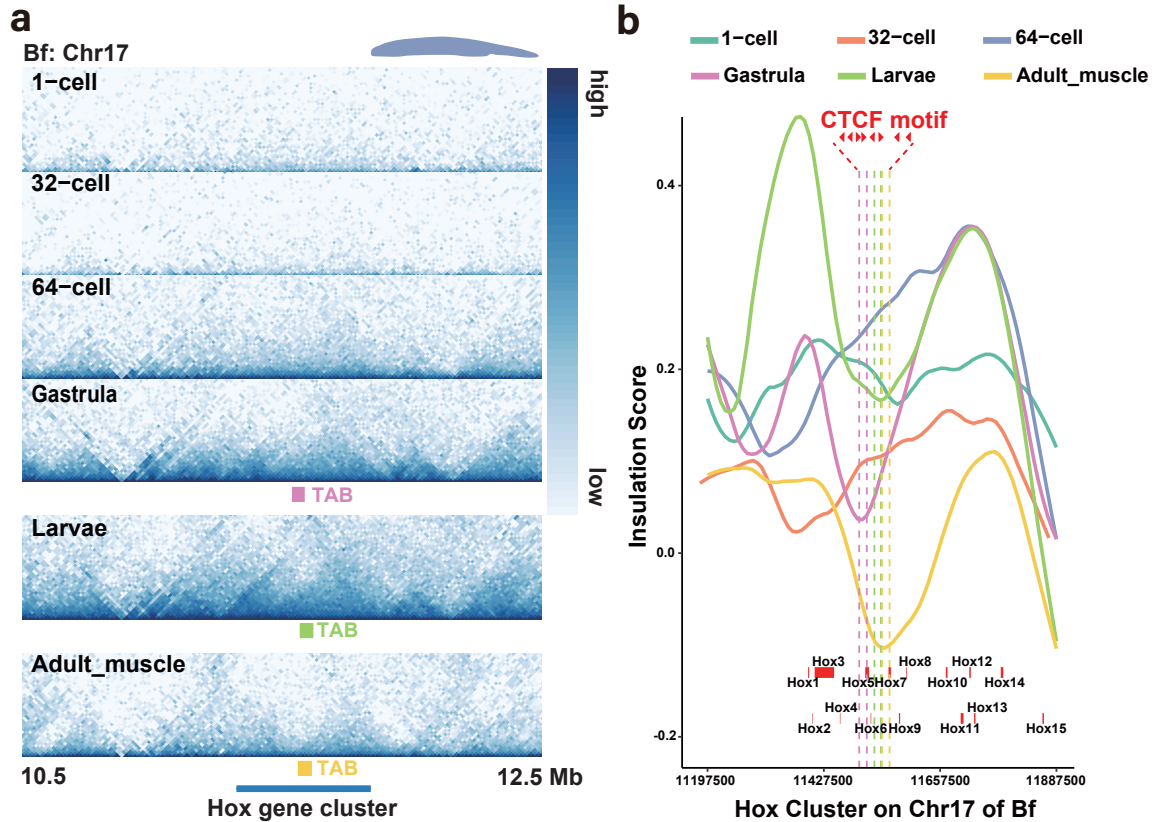

**Fig. S30. TAD and insulation score at 15kb resolution within the amphioxus Hox gene cluster.**

a) The interaction heat map for high-order chromatin structures of chromosome 17(10500000-12500000) showing the TAD borders (TABs) within *Hox* cluster is shown for 1-cell, 32-cell, 64-cell, gastrula, larvae and adult (muscle tissues) stages of Bf at 15-kb resolution. The dots under heat maps of Gastrula, Larvae and Adult\_muscle indicate the TABs of these three developmental stages.

b) The horizontal solid lines indicate the distribution of insulation scores along the *Hox* gene cluster, the smaller the insulation score, the stronger the TABs. The vertical dotted lines represent the TABs of gastrula (pink), larvae (green) and adult (yellow) stages of amphioxus. The length and location of the *Hox* genes are marked with thick red lines. The TAB at the *Hox* gene cluster is shifted between different developmental stages, but between the regions of *Hox5* and *Hox7*.

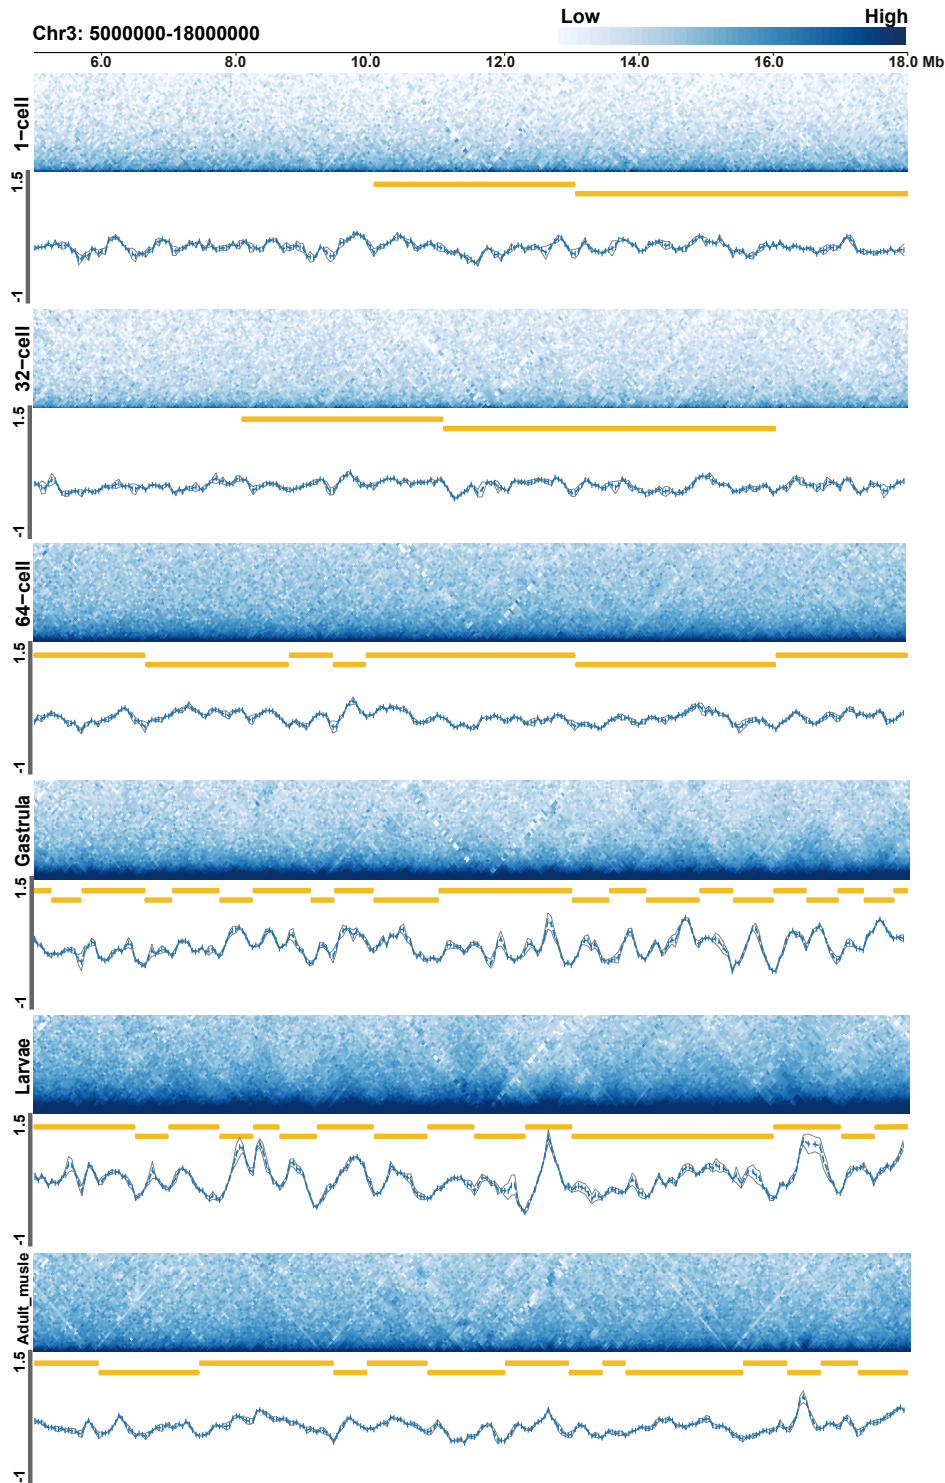

**Fig. S31. Three-dimensional chromatin structures during embryonic development of amphioxus.**

The interaction heat map for high-order chromatin structures of chromosome 3(5M-18M), as an example, is shown for 1-cell, 32-cell, 64-cell, gastrula, larvae and adult(muscle tissues) stages of Bf at 50-kb resolution. The lines indicate the insulation score of each development stages.

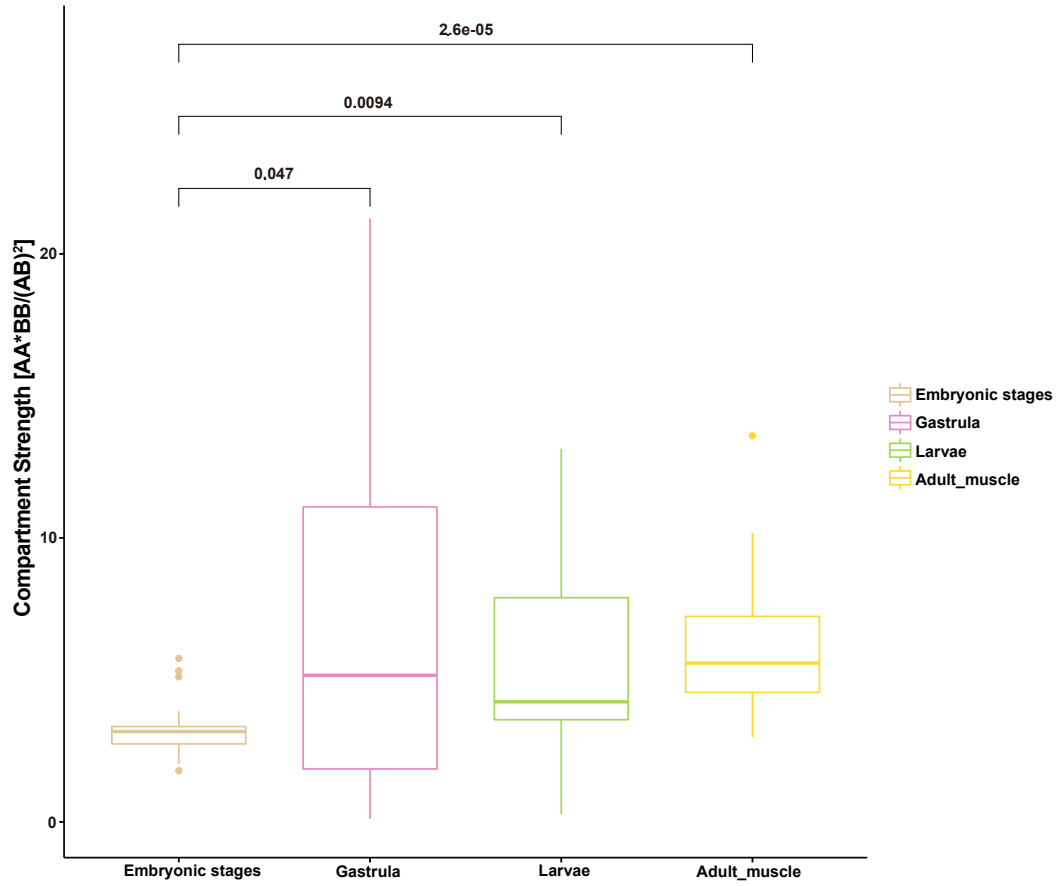

**Fig. S32. A/B compartment strength between different developmental stages**

Compartment strengths were calculated as  $AA*BB/AB^2$  for each chromosome. The value in embryonic stages is the average value of compartments strength identified in 1-cell, 32-cell and 64-cell.

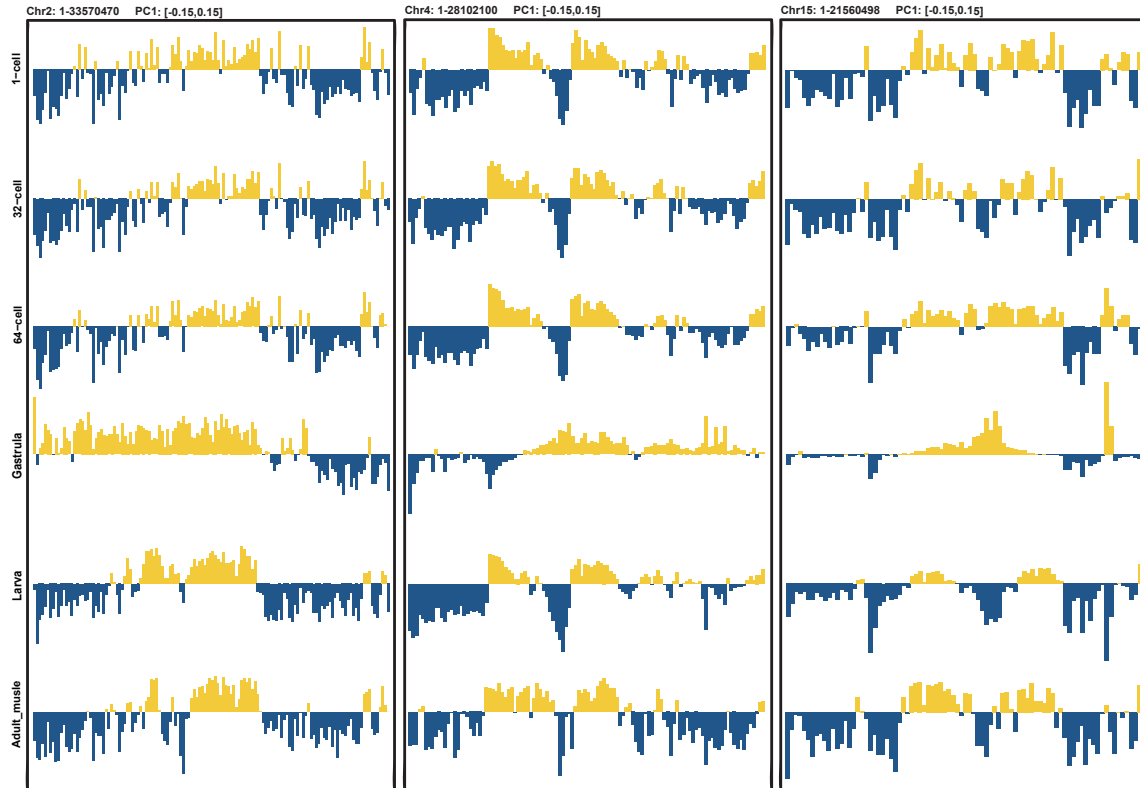

**Fig. S33. Eigenvector 1 value tracks for amphioxus chromosomes at 250kb resolution at six different developmental stages.**

Eigenvector 1 values (PC1, 250kb resolution) across the amphioxus chromosome 2, chromosome 4 and chromosome 15, representing A (yellow) and B (blue) compartments. On some chromosomes, e.g., chr2, compartment strength is significantly reduced at the gastrula stage.

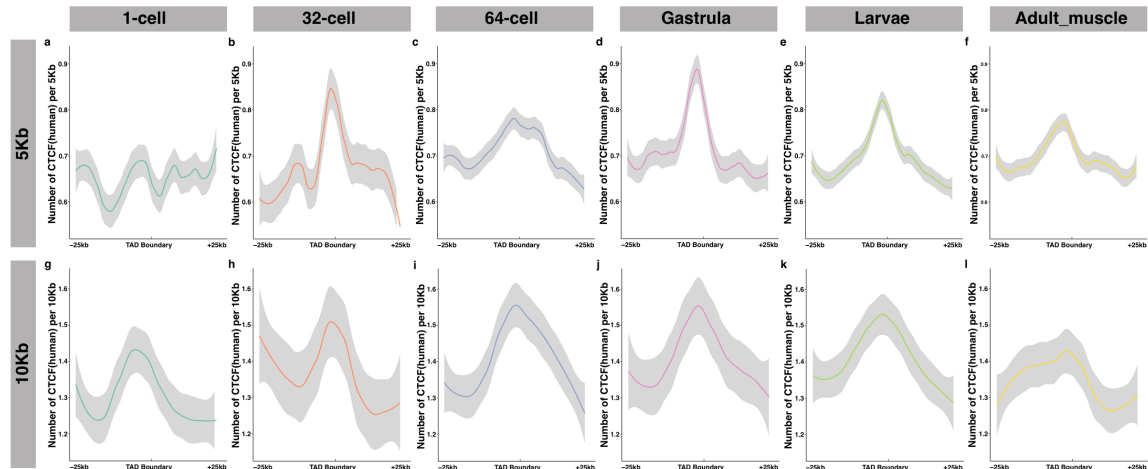

**Fig. S34. Enrichment of putative CTCF-binding sites at TAD boundaries in the amphioxus genome.**

a-f) Putative CTCF binding site density was calculated in 5kb windows overlapping each other 50% along the up- and down-stream (25kb) regions of amphioxus TAD boundaries. For each window, the mean value of the CTCF density was used to generate the plots. Panel a-f represent 1-cell, 32cell, 64-cell, gastrula, larvae and adult muscle respectively.

g-l) The same as panel a-f but in 10kb resolution.

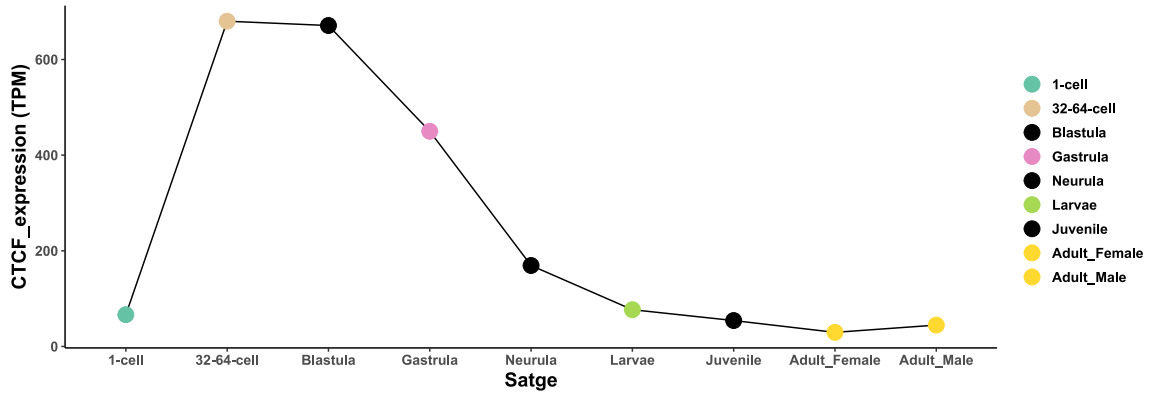

**Fig. S35. Expression of CTCF in Bf during developmental stages.**

The expression of the CTCF gene is increased at zygotic genome activation (ZGA) around the 64-cell stage.

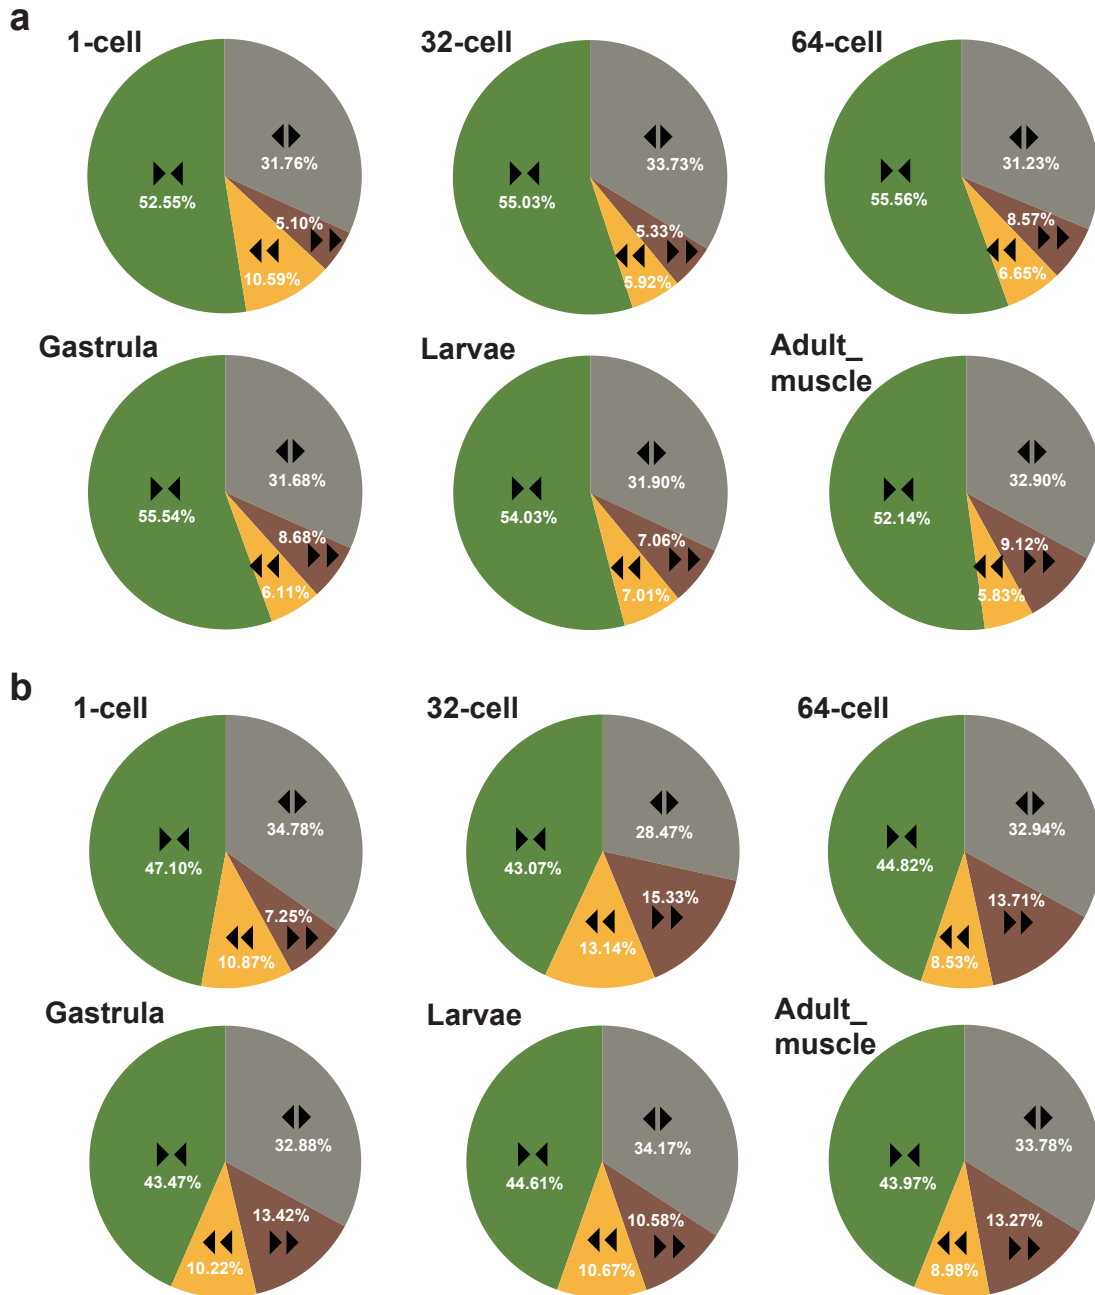

**Fig. S36. The orientation of CTCF-binding sites pairs in amphioxus TABs.**

a) Pie chart shows four types of orientation (arrowheads and different colors, green color for the convergent CTCF site pairs) for the paired CTCF sites in the TABs. The TABs are identified at the 5kb resolution and extended 5kb up- and down-stream, respectively. The convergent CTCF-binding site pairs are the major type(>52%).

b) The same as a, but in 10kb resolution. The ratio of convergent CTCF-binding site pairs reduced to about 45%.

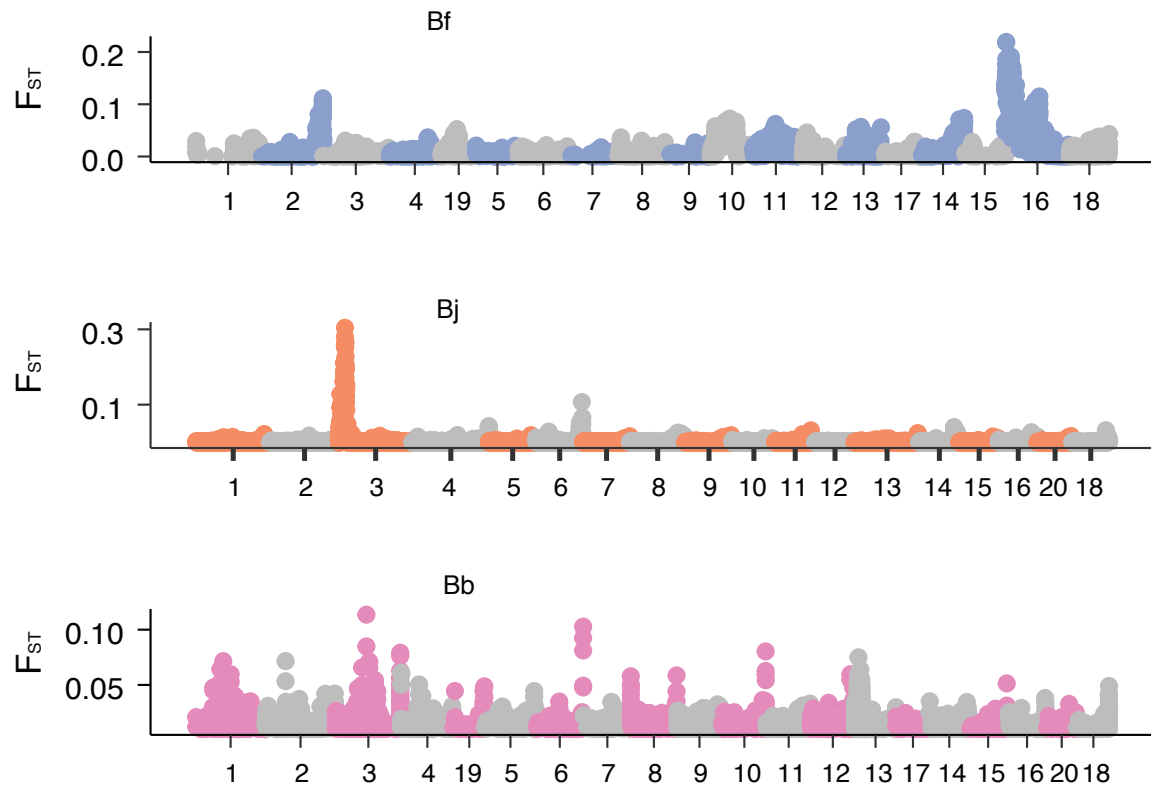

**Fig. S37. The  $F_{ST}$  statistics between male and female populations.**

Only biallelic SNPs were considered for  $F_{ST}$  calculation. The  $F_{ST}$  values were estimated in 10 kb windows for Bj and Bf, but 5 kb for Bb because of the smaller size of the non-recombining region (~1.5 kb) in Bb. The highest peaks of  $F_{ST}$  appear at Chr16, Chr3 and Chr3 of Bf, Bj, and Bb respectively. The number of individuals re-sequenced can be found in the Supplementary Table S5.



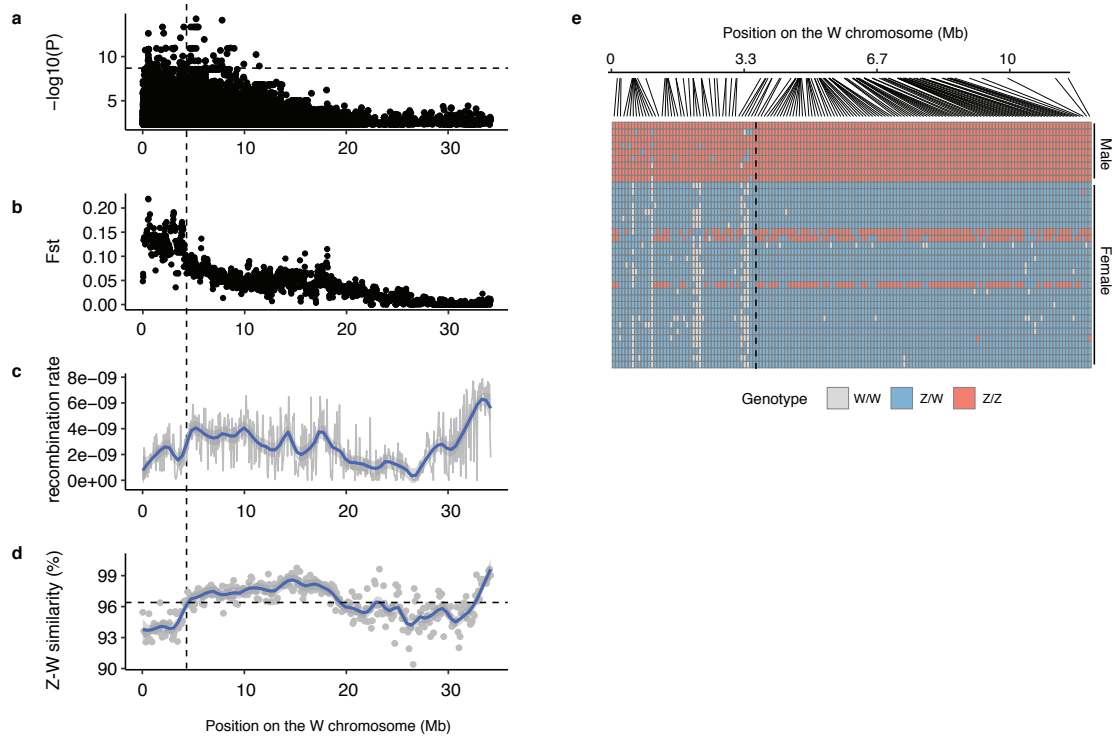

**Fig. S38. The sex-linked region in *Bf*.**

a) A zoom-in view of Fig. 5a on the Chr16 (ChrW). b) A zoom-in view of Fig. S37 on the Chr16 chromosome. c) This panel was retrieved from Fig. S7 for *Bf* Chr16. d) We used Lastz to align the ChrZ and ChrW sequences, and calculated the sequence similarity in 100 kb windows (grey dot). The blue line shows the smoothed mean values. The horizontal dashed line shows the mean sequence similarity between the *Bf* and *Bf\_2* genomes. The vertical dashed line shows the boundary of the first evolutionary stratum. e) The position and genotype of the female-associated SNPs. Each column in the lower panel represents a SNP site and each row represents an individual. The vertical dashed line shows the boundary of the first evolutionary stratum.

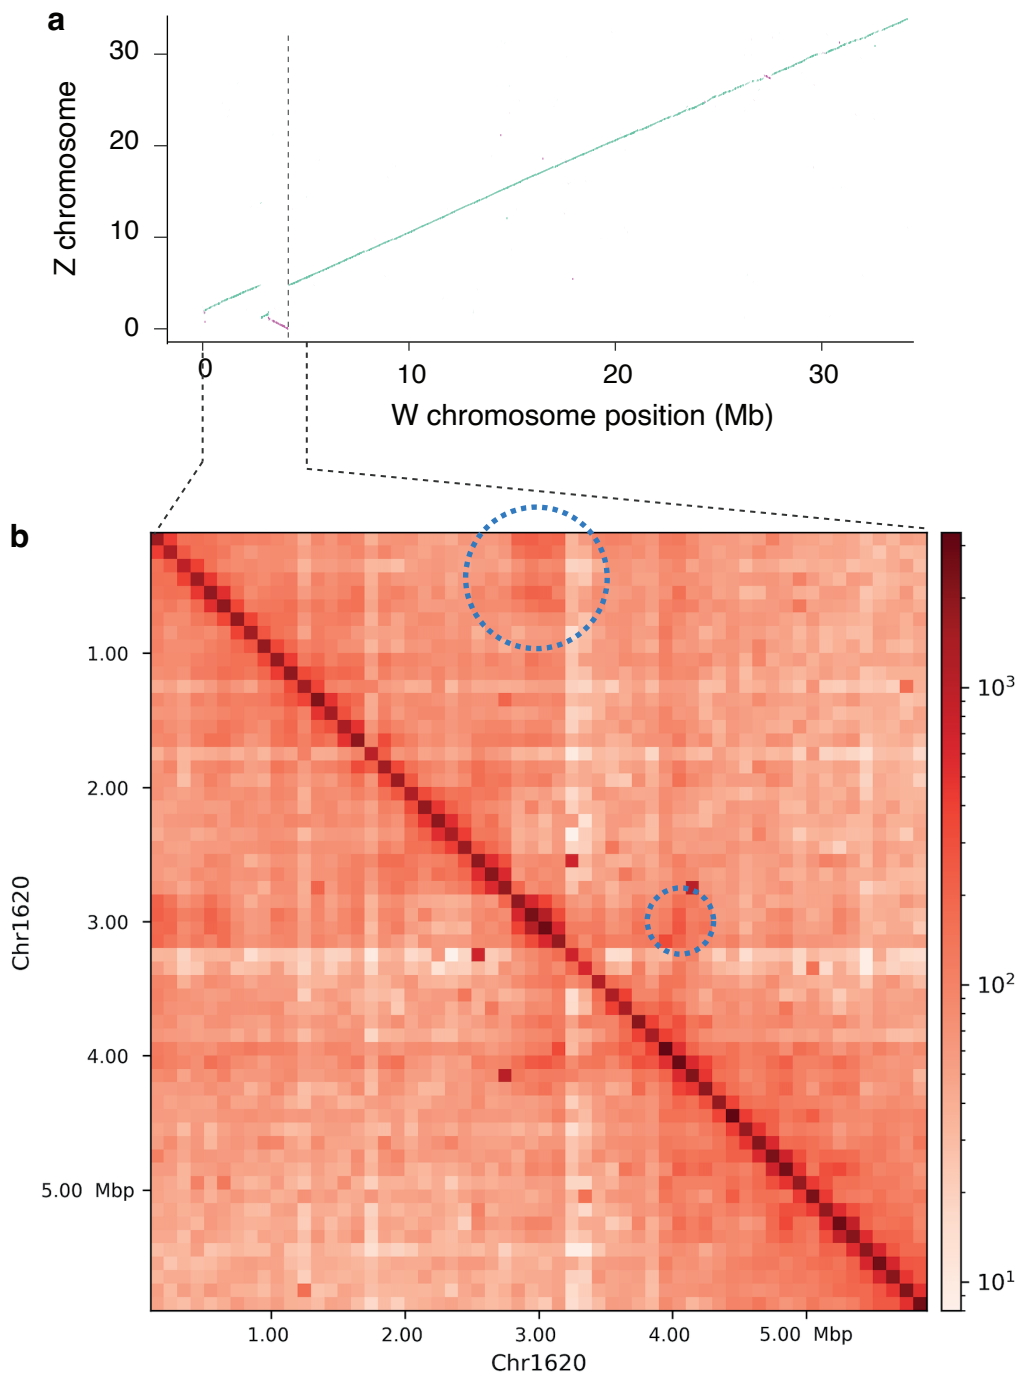

**Fig. S39. the inversion between the Z and W on the oldest stratum.**

a) a dot-plot figure for the Z-W chromosome alignment, similar to the figure 5e. b) The Hi-C interaction heatmap for the first 6 Mb of the W chromosome. The blue dashes circles point to the signals of inversions at 3.2 Mb and 3.9 Mb.

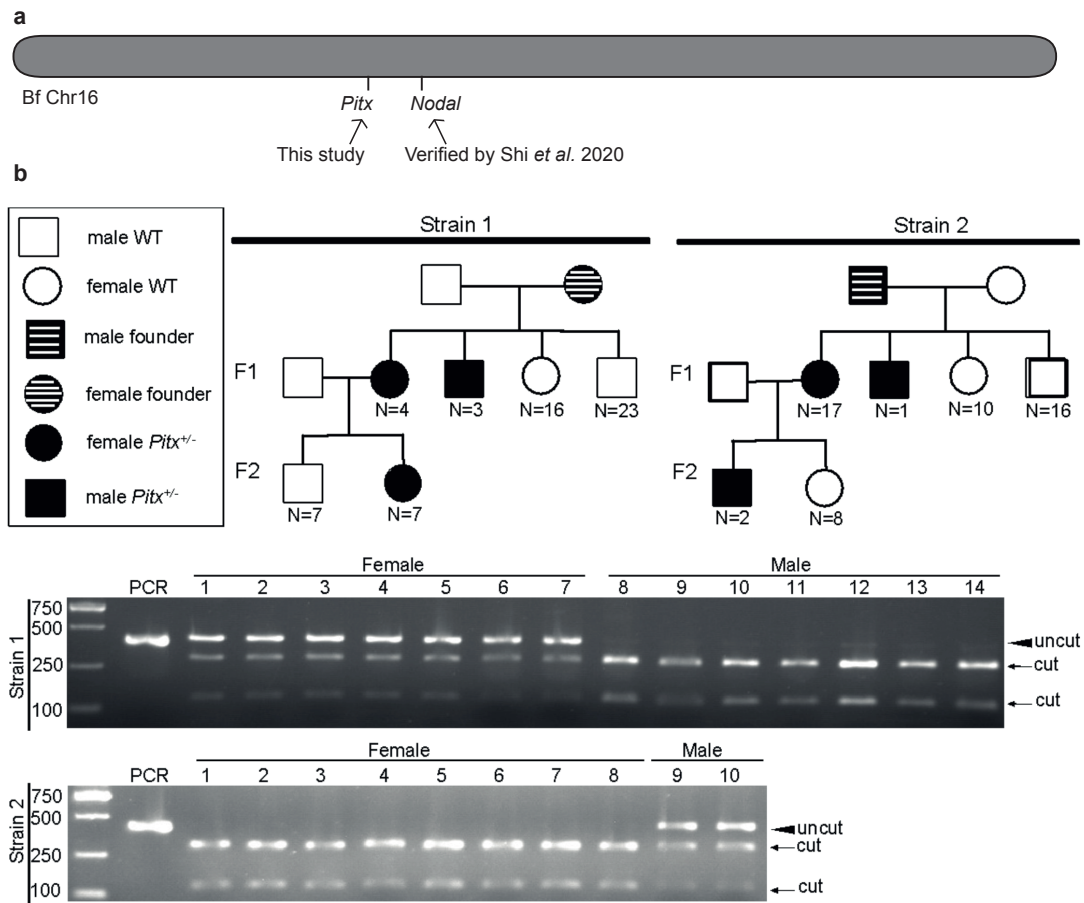

**Fig. S40. Experiment design to verify the sex-linkage of *Pitx* in *B. floridae*.**

a) Both *Pitx* and *Nodal* are located on the ZW chromosome (Chr16) in Bf.

b) Pedigree and genotyping of *Pitx* mutant strains. The mutation types carried in *Pitx*<sup>+/-</sup> heterozygotes of this figure include frame shift and non-frame shift mutations. The animal numbers analyzed are noted. Strain 1: a female founder injected with TALEN pair *Pitx*-Fw3/Rv3 (primer Fw3: 5'-GCAACCGTTCGACGAC-3' and Rv3 5'-TGTAGGCCGCGAGTA-3') was crossed with a WT male. One F1 female *Pitx*<sup>+/-</sup> heterozygote carrying mutation (-14 bp) was crossed a WT male.

Strain 2: a male founder injected was crossed with a WT female. One F1 female *Pitx*<sup>+/-</sup> heterozygote carrying mutation (-7 bp, +18 bp) was crossed with a WT male.

Genotyping analysis of F2 progenies from both strain 1 and 2 is present. Amplicons from were digested with *TaqI* enzyme and separated on 2% agarose gel to identify their genotypes.

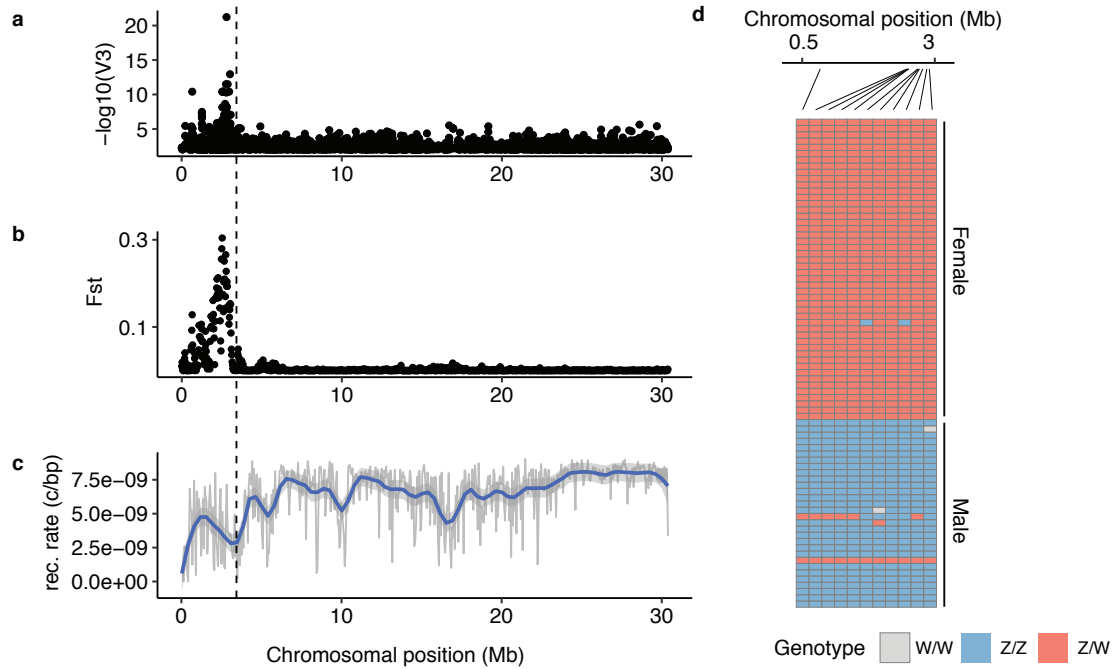

**Fig. S41. The candidate sex determining region of Bj.**

a) A zoom-in view of Fig. 5b on the Chr3 (ChrZ). b) A zoom-in view of Supplementary Fig. S37 on the Chr3 chromosome of Bj. c) This panel (recombination rate) was retrieved from Supplementary Fig. S7 for Bj Chr3. The vertical dashed line indicates the boundary of the sex-linked region. d) The position and genotype of the female-associated SNPs. Each column in the lower panel represents a SNP site and each row represents one individual.

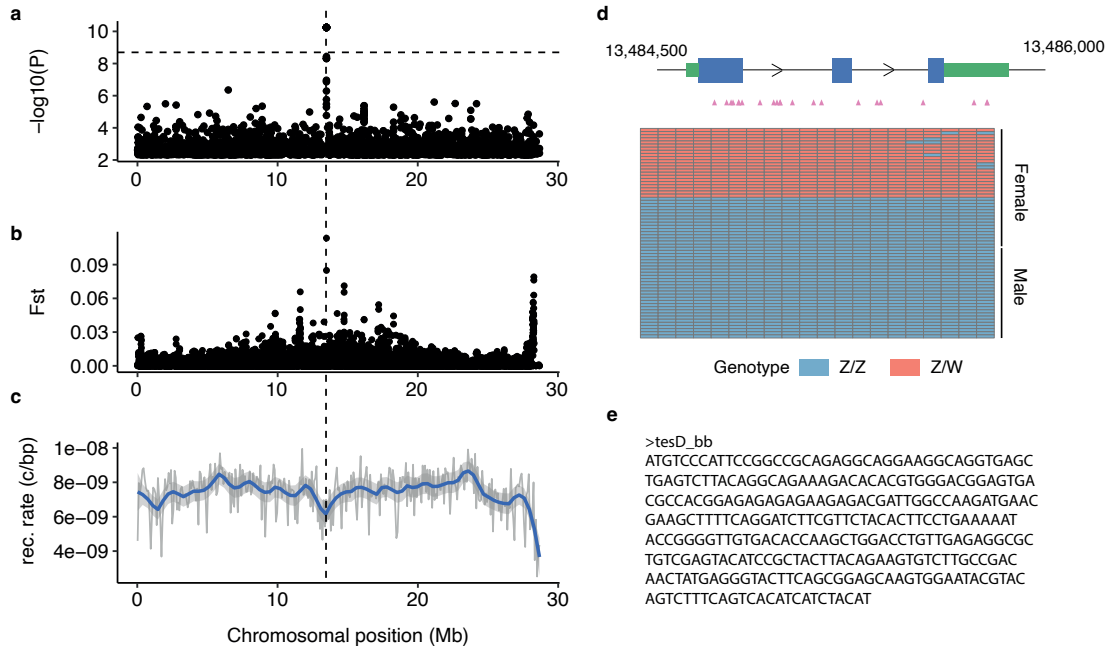

**Fig. S42. The candidate sex determining region of Bb.**

a) A zoom-in view of Fig. 5c on the Chr3 (ChrZ). b) A zoom-in view of Supplementary Fig. S37 on the Chr3 chromosome of Bb. c) This panel (recombination rate) was retrieved from Supplementary Fig. S7 for Bb Chr3. The vertical dashed line indicates the position of the Bb sex-linked locus. d) The sex-linked variants (pink triangles) are all located in the gene body of the Bb candidate sex-determining gene *tesD*. Each column in the lower panel represents a SNP site and each row represents an individual. The SNP sites are ordered according to their position in the genome. e) the coding sequence of *testD*.

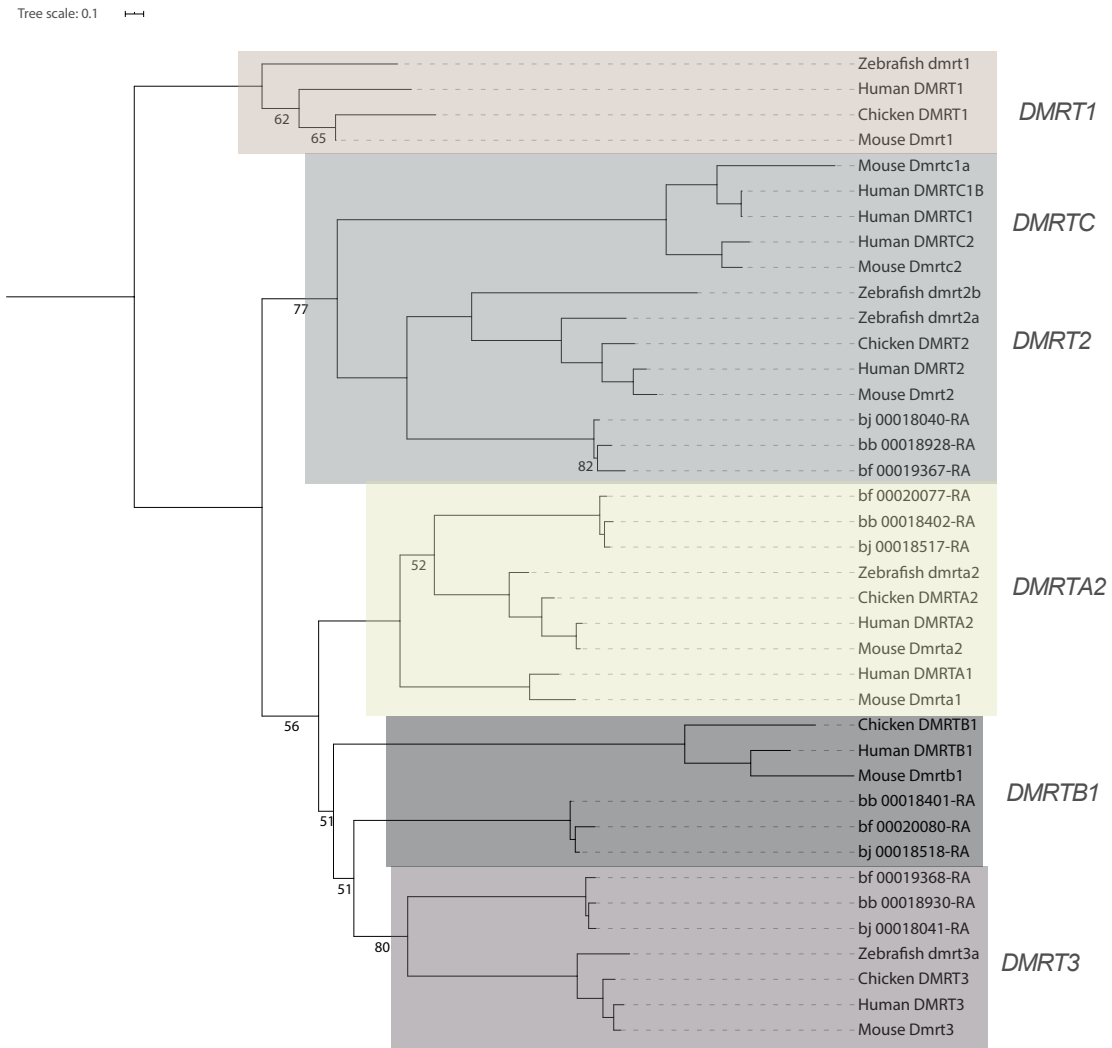

**Fig. S43. The phylogeny of DMRT family genes across chordates.**

The phylogeny was built from the coding sequences of the DMRT family genes of Bj, Bb, Bf, human, mouse, chicken and zebrafish. The root of DMRT family phylogeny was decided according to (2). The same families were highlighted in the same colored background. Bootstrapping values higher than 90 were not labelled at the nodes. Amphioxus lacks the *DMRT1* gene.

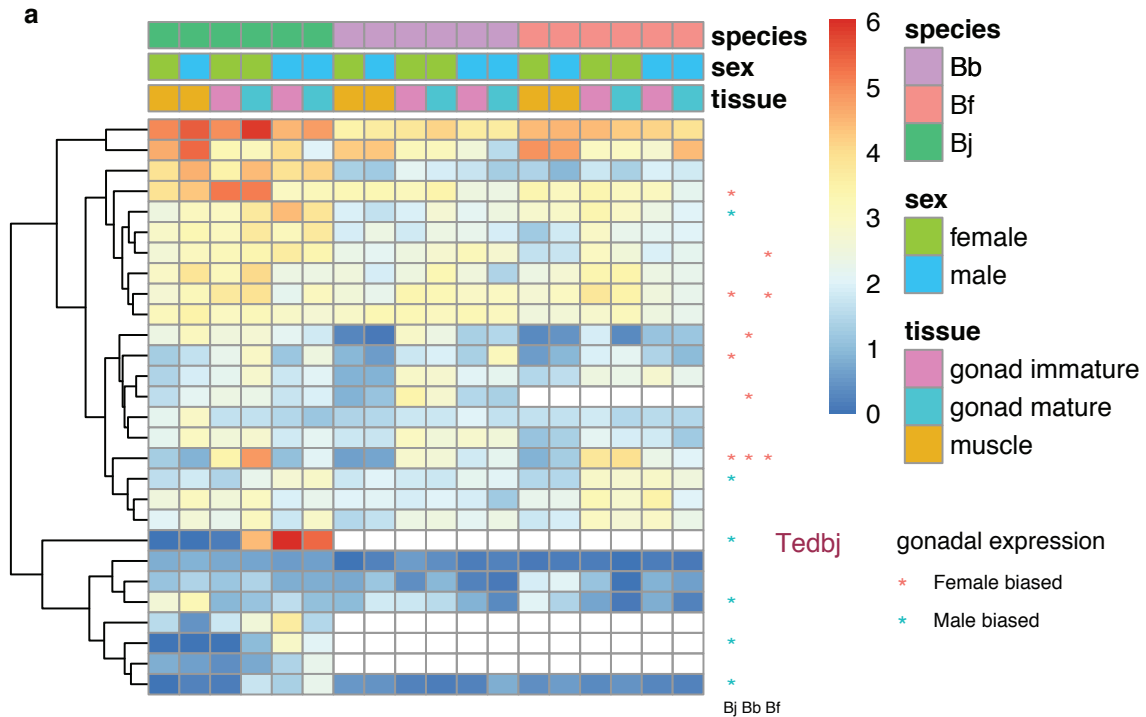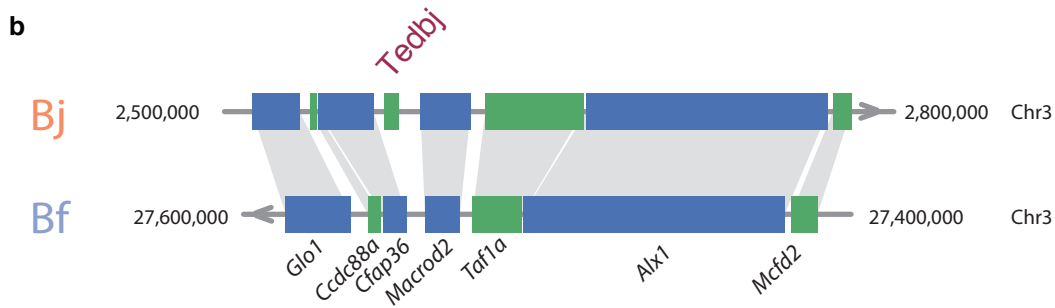

**Fig. S44. The expression profile of sex-linked genes in Bj.**

a) The heatmap shows the expression levels of the sex-linked genes of Bj stratum I in immature and mature gonads, as well as muscle, in three amphioxuses. The expression levels were  $\log_2$  transformed. The blank tiles in the Bb and Bj panels represent those genes whose orthologs are absent in certain species. The asterisks at the end of the rows indicate whether the genes show differential expression between the immature gonads of males and females in Bj, Bb and Bf. *Tedbj* was highlighted which has a strong testis-biased expression.

b) Gene synteny around *Tedbj* between Bj and Bf. *Tedbj* is found to be specific to Bj which is also lacking in Bb (not shown).

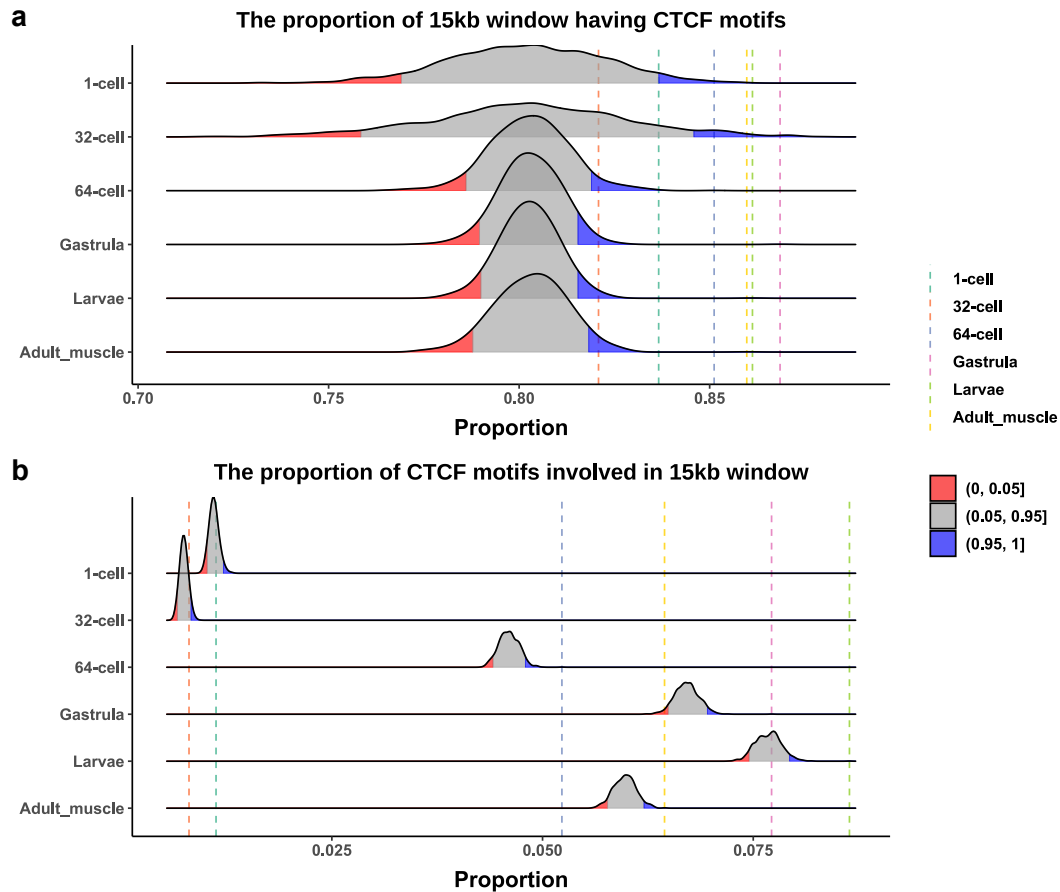

**Fig. S45. Significance test of CTCF enrichment at TABs.**

a) For each developmental stage, we randomly selected 15kb windows with the same number of TABs across the genome and calculated the proportion of 15kb windows having CTCF motifs. We repeated this step for 1000 times and obtained the density of all numbers of proportions. The red part and blue part showed the lowest 5% and highest 5% proportions, respectively. The proportion of TABs having CTCF motifs of each stage was indicated by vertical dotted lines in different colors.

b) We used the same significance test method as a), but we calculated the proportion of CTCF motifs involved in 15kb windows.



**Table S1. Statistics of genome assembly**

| Species                   | Read type  | Assembly                 | Genome size (Mb) | NG50 contig (Mb) | NG50 scaffold (Mb) | % assigned to chromosomes | BUSCO complete (%) | BUSCO duplicate (%) | BUSCO fragment (%) | BUSCO missing (%) |
|---------------------------|------------|--------------------------|------------------|------------------|--------------------|---------------------------|--------------------|---------------------|--------------------|-------------------|
| Branchiostoma floridae    | Long read  | Bf-hap                   | 490.3            | 7.6              | 25.5               | 99.5                      | 97.7               | 1.1                 | 0.5                | 1.8               |
| Branchiostoma floridae    | Long read  | Bf-hap-2                 | 490.8            | 6.4              | 24.6               | 98.7                      | 97.9               | 1.2                 | 0.3                | 1.8               |
| Branchiostoma belcheri    | Long read  | Bb-hap                   | 406.5            | 13.9             | 19.7               | 98.8                      | 97.4               | 1.2                 | 0.6                | 2                 |
| Branchiostoma japonicum   | Long read  | Bj-hap                   | 382.0            | 14.2             | 19.6               | 99.1                      | 97.4               | 1                   | 0.6                | 2                 |
| Branchiostoma floridae    | Short read | Bfl_VNyyK (Bf_2020)      | 513.4            | 0.0504           | 25.4               | 94.2                      | 95.6               | 1                   | 1.3                | 3.1               |
| Branchiostoma floridae    | Short read | Version 2 (Bf_2008)      | 521.9            | 0.0279           | 2.6                | -                         | 93.4               | 4                   | 2.1                | 4.5               |
| Branchiostoma belcheri    | Short read | Haploidv1 8h27 (Bb_2014) | 426.1            | 0.0472           | 2.3                | -                         | 97.2               | 1.4                 | 0.7                | 2.1               |
| Branchiostoma lanceolatum | Short read | BI71nemr (BI_2018)       | 495.2            | 0.0533           | 1.3                | -                         | 95.8               | 2.7                 | 2.5                | 1.7               |

**Table S2. Estimations for the divergence time using orthologous genes.**

| <b>Node name</b> | <b>constraints [min, max] (Mya)</b> | <b>Mean</b> | <b>95% (Mya)</b> | <b>CI</b> |
|------------------|-------------------------------------|-------------|------------------|-----------|
| chordate         | [514, 636.1]                        | 592.5       | [530,8 640.3]    |           |
| Vertebrate       | NA                                  | 553.1       | [494.3, 614.7]   |           |
| Gnathostomata    | [420.7, 468.4]                      | 453.8       | [429.9, 470.4]   |           |
| Amniota          | [318, 332.9]                        | 325.3       | [317.9, 322.8]   |           |
| Actinopterygii   | [378.19, 422.4]                     | 389.8       | [375.2, 411.3]   |           |
| Euarchontoglires | [65.6, 164.6]                       | 116.1       | [72.1, 163.1]    |           |
| Branchiostoma    | NA                                  | 99.9        | [22.1, 211.7]    |           |
| Bb/Bj            | NA                                  | 59.3        | [12.2, 132.0]    |           |

**Table S3. GO enrichment for lineage-specific orthologs.**

| Taxa       | GO term    | GO description                                                                                                                        | p value  | FDR         |
|------------|------------|---------------------------------------------------------------------------------------------------------------------------------------|----------|-------------|
| Vertebrate | GO:0007155 | cell adhesion                                                                                                                         | 9.47E-20 | 1.44E-16    |
|            | GO:0007204 | positive regulation of cytosolic calcium ion concentration                                                                            | 6.43E-15 | 3.26E-12    |
|            | GO:0007218 | neuropeptide signaling pathway                                                                                                        | 6.13E-14 | 2.33E-11    |
|            | GO:0005179 | hormone activity                                                                                                                      | 4.10E-12 | 1.04E-09    |
|            | GO:0004896 | cytokine receptor activity                                                                                                            | 5.94E-12 | 1.29E-09    |
|            | GO:0007267 | cell-cell signaling                                                                                                                   | 1.07E-11 | 2.17E-09    |
|            | GO:0007200 | phospholipase C-activating G protein-coupled receptor signaling pathway                                                               | 1.66E-11 | 3.05E-09    |
|            | GO:0019221 | cytokine-mediated signaling pathway                                                                                                   | 5.63E-11 | 9.51E-09    |
|            | GO:0001525 | angiogenesis                                                                                                                          | 2.24E-10 | 3.24E-08    |
|            | GO:0001227 | DNA-binding transcription repressor activity, RNA polymerase II-specific                                                              | 3.32E-10 | 4.39E-08    |
|            | GO:0008201 | heparin binding                                                                                                                       | 2.83E-09 | 3.44E-07    |
|            | GO:0008284 | positive regulation of cell population proliferation                                                                                  | 3.92E-09 | 4.51E-07    |
|            | GO:0008083 | growth factor activity                                                                                                                | 4.00E-09 | 4.51E-07    |
|            | GO:0001228 | DNA-binding transcription activator activity, RNA polymerase II-specific                                                              | 4.58E-09 | 4.97E-07    |
|            | GO:0005102 | signaling receptor binding                                                                                                            | 7.06E-09 | 7.28E-07    |
|            | GO:0019955 | cytokine binding                                                                                                                      | 7.18E-09 | 7.28E-07    |
|            | GO:0007156 | homophilic cell adhesion via plasma membrane adhesion molecules                                                                       | 9.96E-09 | 9.17E-07    |
|            | GO:0005184 | neuropeptide hormone activity                                                                                                         | 1.34E-08 | 1.14E-06    |
|            | GO:0018146 | keratan sulfate biosynthetic process                                                                                                  | 1.34E-08 | 1.14E-06    |
|            | GO:0007601 | visual perception                                                                                                                     | 1.68E-08 | 1.38E-06    |
|            | GO:0044212 | transcription regulatory region DNA binding                                                                                           | 2.27E-08 | 1.80E-06    |
|            | GO:0035025 | positive regulation of Rho protein signal transduction                                                                                | 2.37E-08 | 1.80E-06    |
|            | GO:0007268 | chemical synaptic transmission                                                                                                        | 2.37E-08 | 1.80E-06    |
|            | GO:0035589 | G protein-coupled purinergic nucleotide receptor signaling pathway                                                                    | 5.76E-08 | 4.27E-06    |
|            | GO:0005243 | gap junction channel activity                                                                                                         | 6.09E-08 | 4.31E-06    |
|            | GO:0038023 | signaling receptor activity                                                                                                           | 7.56E-08 | 5.07E-06    |
|            | GO:0070374 | positive regulation of ERK1 and ERK2 cascade                                                                                          | 7.66E-08 | 5.07E-06    |
|            | GO:0045028 | G protein-coupled purinergic nucleotide receptor activity                                                                             | 8.96E-08 | 5.80E-06    |
|            | GO:0051482 | positive regulation of cytosolic calcium ion concentration involved in phospholipase C-activating G protein-coupled signaling pathway | 1.06E-07 | 6.73E-06    |
|            | GO:0005581 | collagen trimer                                                                                                                       | 1.18E-07 | 7.34E-06    |
|            | GO:0030335 | positive regulation of cell migration                                                                                                 | 1.66E-07 | 1.01E-05    |
|            | GO:0016338 | calcium-independent cell-cell adhesion via plasma membrane cell-adhesion molecules                                                    | 2.94E-07 | 1.75E-05    |
|            | GO:0016339 | calcium-dependent cell-cell adhesion via plasma membrane cell adhesion molecules                                                      | 3.29E-07 | 1.92E-05    |
|            | GO:0005518 | collagen binding                                                                                                                      | 3.51E-07 | 2.01E-05    |
|            | GO:0019233 | sensory perception of pain                                                                                                            | 3.70E-07 | 2.05E-05    |
|            | GO:0019838 | growth factor binding                                                                                                                 | 3.95E-07 | 2.15E-05    |
|            | GO:0044267 | cellular protein metabolic process                                                                                                    | 4.83E-07 | 2.58E-05    |
|            | GO:0051965 | positive regulation of synapse assembly                                                                                               | 5.22E-07 | 2.70E-05    |
|            | GO:0030021 | extracellular matrix structural constituent conferring compression resistance                                                         | 5.33E-07 | 2.70E-05    |
|            | GO:0008013 | beta-catenin binding                                                                                                                  | 1.08E-06 | 5.35E-05    |
|            | GO:0007189 | adenylate cyclase-activating G protein-coupled receptor signaling pathway                                                             | 1.11E-06 | 5.35E-05    |
|            | GO:0003429 | growth plate cartilage chondrocyte morphogenesis                                                                                      | 1.33E-06 | 6.31E-05    |
|            | GO:0042730 | fibrinolysis                                                                                                                          | 1.38E-06 | 6.35E-05    |
|            | GO:0097755 | positive regulation of blood vessel diameter                                                                                          | 1.38E-06 | 6.35E-05    |
|            | GO:0051897 | positive regulation of protein kinase B signaling                                                                                     | 1.47E-06 | 6.58E-05    |
|            | GO:0007162 | negative regulation of cell adhesion                                                                                                  | 1.69E-06 | 7.33E-05    |
|            | GO:0007015 | actin filament organization                                                                                                           | 1.74E-06 | 7.45E-05    |
|            | GO:0007422 | peripheral nervous system development                                                                                                 | 1.98E-06 | 8.37E-05    |
|            | GO:0043406 | positive regulation of MAP kinase activity                                                                                            | 3.21E-06 | 1.32E-04    |
|            | GO:0002576 | platelet degranulation                                                                                                                | 3.38E-06 | 0.000137079 |
|            | GO:0007565 | female pregnancy                                                                                                                      | 3.60E-06 | 0.000144093 |
|            | GO:0016525 | negative regulation of angiogenesis                                                                                                   | 3.94E-06 | 0.000155641 |
|            | GO:0042060 | wound healing                                                                                                                         | 4.20E-06 | 0.000163764 |
|            | GO:0007631 | feeding behavior                                                                                                                      | 5.89E-06 | 0.000224042 |
|            | GO:0051930 | regulation of sensory perception of pain                                                                                              | 5.89E-06 | 0.000224042 |
|            | GO:0016327 | apicolateral plasma membrane                                                                                                          | 6.27E-06 | 0.00023528  |
|            | GO:0070102 | interleukin-6-mediated signaling pathway                                                                                              | 6.51E-06 | 0.000241426 |
|            | GO:0008092 | cytoskeletal protein binding                                                                                                          | 7.37E-06 | 0.000270133 |
|            | GO:0006954 | inflammatory response                                                                                                                 | 8.32E-06 | 0.000297838 |
|            | GO:0008285 | negative regulation of cell population proliferation                                                                                  | 8.49E-06 | 0.000300061 |
|            | GO:0002687 | positive regulation of leukocyte migration                                                                                            | 1.12E-05 | 0.000392836 |

| Taxa | GO term    | GO description                                                            | p value  | FDR         |
|------|------------|---------------------------------------------------------------------------|----------|-------------|
|      | GO:0007409 | axonogenesis                                                              | 1.24E-05 | 0.000429782 |
|      | GO:0043194 | axon initial segment                                                      | 1.39E-05 | 0.000475368 |
|      | GO:0000902 | cell morphogenesis                                                        | 1.45E-05 | 0.0004897   |
|      | GO:0035633 | maintenance of blood-brain barrier                                        | 1.55E-05 | 0.00051837  |
|      | GO:0016324 | apical plasma membrane                                                    | 1.68E-05 | 0.000554027 |
|      | GO:0043005 | neuron projection                                                         | 2.10E-05 | 0.000686843 |
|      | GO:0098982 | GABA-ergic synapse                                                        | 2.20E-05 | 0.000712294 |
|      | GO:0005104 | fibroblast growth factor receptor binding                                 | 2.26E-05 | 0.000723652 |
|      | GO:0007229 | integrin-mediated signaling pathway                                       | 2.37E-05 | 0.000752044 |
|      | GO:0009612 | response to mechanical stimulus                                           | 2.54E-05 | 0.000795008 |
|      | GO:0031093 | platelet alpha granule lumen                                              | 3.34E-05 | 0.001035399 |
|      | GO:0050731 | positive regulation of peptidyl-tyrosine phosphorylation                  | 3.45E-05 | 0.001048882 |
|      | GO:0034113 | heterotypic cell-cell adhesion                                            | 3.45E-05 | 0.001048882 |
|      | GO:0007411 | axon guidance                                                             | 3.52E-05 | 0.0010591   |
|      | GO:0002040 | sprouting angiogenesis                                                    | 3.69E-05 | 0.001090492 |
|      | GO:0006953 | acute-phase response                                                      | 3.73E-05 | 0.001090492 |
|      | GO:0071392 | cellular response to estradiol stimulus                                   | 3.73E-05 | 0.001090492 |
|      | GO:0005540 | hyaluronic acid binding                                                   | 3.98E-05 | 0.001151542 |
|      | GO:0008360 | regulation of cell shape                                                  | 4.08E-05 | 0.001171766 |
|      | GO:0005178 | integrin binding                                                          | 4.29E-05 | 0.00121105  |
|      | GO:0014068 | positive regulation of phosphatidylinositol                               | 4.30E-05 | 0.001417713 |
|      | GO:0032496 | response to lipopolysaccharide                                            | 4.48E-05 | 1.24E-03    |
|      | GO:0007193 | adenylate cyclase-inhibiting G protein-coupled receptor signaling pathway | 4.49E-05 | 0.001240922 |
|      | GO:0002682 | regulation of immune system process                                       | 5.12E-05 | 0.001390149 |
|      | GO:0030594 | neurotransmitter receptor activity                                        | 5.19E-05 | 0.001395936 |
|      | GO:0051378 | serotonin binding                                                         | 6.18E-05 | 0.001634395 |
|      | GO:0045295 | gamma-catenin binding                                                     | 6.83E-05 | 0.001789526 |
|      | GO:0001817 | regulation of cytokine production                                         | 7.16E-05 | 0.001862134 |
|      | GO:0008528 | G protein-coupled peptide receptor activity                               | 7.71E-05 | 0.001985917 |
|      | GO:0050877 | nervous system process                                                    | 7.81E-05 | 0.001995776 |
|      | GO:0006936 | muscle contraction                                                        | 7.97E-05 | 0.002019753 |
|      | GO:0003779 | actin binding                                                             | 8.89E-05 | 0.002215183 |
|      | GO:0019957 | C-C chemokine binding                                                     | 1.09E-04 | 0.002648187 |
|      | GO:0042923 | neuropeptide binding                                                      | 1.09E-04 | 0.002648187 |
|      | GO:0007166 | cell surface receptor signaling pathway                                   | 1.12E-04 | 0.00271518  |
|      | GO:0005242 | inward rectifier potassium channel activity                               | 1.16E-04 | 0.002787667 |
|      | GO:0035987 | endodermal cell differentiation                                           | 1.18E-04 | 0.002805401 |
|      | GO:0035914 | skeletal muscle cell differentiation                                      | 1.34E-04 | 0.003167765 |
|      | GO:0005865 | striated muscle thin filament                                             | 1.41E-04 | 0.003263933 |
|      | GO:0050930 | induction of positive chemotaxis                                          | 1.41E-04 | 0.003263933 |
|      | GO:0070757 | interleukin-35-mediated signaling pathway                                 | 1.50E-04 | 0.003462637 |
|      | GO:0090050 | positive regulation of cell migration involved in sprouting angiogenesis  | 1.52E-04 | 0.003465429 |
|      | GO:0019956 | chemokine binding                                                         | 1.71E-04 | 0.003852374 |
|      | GO:0045987 | positive regulation of smooth muscle contraction                          | 2.05E-04 | 0.00452882  |
|      | GO:0098641 | cadherin binding involved in cell-cell adhesion                           | 2.05E-04 | 0.00452882  |
|      | GO:0001501 | skeletal system development                                               | 2.06E-04 | 0.00452882  |
|      | GO:0007596 | blood coagulation                                                         | 2.34E-04 | 0.005109771 |
|      | GO:0005044 | scavenger receptor activity                                               | 2.40E-04 | 0.005184503 |
|      | GO:0051781 | positive regulation of cell division                                      | 2.40E-04 | 0.005184503 |
|      | GO:0033627 | cell adhesion mediated by integrin                                        | 2.45E-04 | 0.005241036 |
|      | GO:0018298 | protein-chromophore linkage                                               | 2.66E-04 | 0.005579343 |
|      | GO:0035994 | response to muscle stretch                                                | 2.66E-04 | 0.005579343 |
|      | GO:0008307 | structural constituent of muscle                                          | 2.75E-04 | 0.005737607 |
|      | GO:0010628 | positive regulation of gene expression                                    | 3.10E-04 | 0.00642159  |
|      | GO:0034707 | chloride channel complex                                                  | 3.16E-04 | 0.006425898 |
|      | GO:0030208 | dermatan sulfate biosynthetic process                                     | 3.19E-04 | 0.006425898 |
|      | GO:0042340 | keratan sulfate catabolic process                                         | 3.19E-04 | 0.006425898 |
|      | GO:0050927 | positive regulation of positive chemotaxis                                | 3.19E-04 | 0.006425898 |
|      | GO:0060078 | regulation of postsynaptic membrane potential                             | 3.45E-04 | 0.00689942  |
|      | GO:0001666 | response to hypoxia                                                       | 3.54E-04 | 0.007043744 |
|      | GO:0016493 | C-C chemokine receptor activity                                           | 3.81E-04 | 0.007388006 |
|      | GO:0042755 | eating behavior                                                           | 3.81E-04 | 0.007388006 |
|      | GO:0045672 | positive regulation of osteoclast differentiation                         | 3.81E-04 | 0.007388006 |
|      | GO:0051602 | response to electrical stimulus                                           | 3.87E-04 | 0.007453419 |
|      | GO:0005604 | basement membrane                                                         | 3.90E-04 | 0.007453419 |

| Taxa      | GO term    | GO description                                                                                                                | p value     | FDR         |
|-----------|------------|-------------------------------------------------------------------------------------------------------------------------------|-------------|-------------|
|           | GO:0042531 | positive regulation of tyrosine phosphorylation of STAT protein                                                               | 4.00E-04    | 0.007607192 |
|           | GO:0098978 | glutamatergic synapse                                                                                                         | 4.18E-04    | 0.007858617 |
|           | GO:0045766 | positive regulation of angiogenesis                                                                                           | 4.21E-04    | 0.007858617 |
|           | GO:0005198 | structural molecule activity                                                                                                  | 4.21E-04    | 0.007858617 |
|           | GO:0000165 | MAPK cascade                                                                                                                  | 4.51E-04    | 0.008342114 |
|           | GO:0007417 | central nervous system development                                                                                            | 4.53E-04    | 0.008342114 |
| amphioxus | GO:0005230 | extracellular ligand-gated ion channel activity                                                                               | 4.34E-26    | 3.44E-24    |
|           | GO:0034220 | ion transmembrane transport                                                                                                   | 7.38E-26    | 4.39E-24    |
|           | GO:0004888 | transmembrane signaling receptor activity                                                                                     | 8.25E-24    | 3.93E-22    |
|           | GO:0004970 | ionotropic glutamate receptor activity                                                                                        | 4.74E-18    | 1.88E-16    |
|           | GO:0038023 | signaling receptor activity                                                                                                   | 3.32E-14    | 1.13E-12    |
|           | GO:0008373 | sialyltransferase activity                                                                                                    | 1.77E-13    | 4.87E-12    |
|           | GO:0004983 | neuropeptide Y receptor activity                                                                                              | 1.92E-11    | 3.80E-10    |
|           | GO:0006486 | protein glycosylation                                                                                                         | 2.77E-10    | 5.07E-09    |
|           | GO:0051260 | protein homooligomerization                                                                                                   | 4.08E-10    | 6.93E-09    |
|           | GO:0042981 | regulation of apoptotic process                                                                                               | 7.69E-09    | 1.14E-07    |
|           | GO:0004252 | serine-type endopeptidase activity                                                                                            | 7.97E-08    | 9.99E-07    |
|           | GO:0007160 | cell-matrix adhesion                                                                                                          | 3.71E-06    | 4.20E-05    |
|           | GO:0002020 | protease binding                                                                                                              | 1.81E-05    | 0.000187172 |
|           | GO:0070513 | death domain binding                                                                                                          | 1.81E-05    | 0.000187172 |
|           | GO:0004867 | serine-type endopeptidase inhibitor activity                                                                                  | 2.16E-05    | 0.000205676 |
|           | GO:0071805 | potassium ion transmembrane transport                                                                                         | 2.16E-05    | 0.000205676 |
|           | GO:0008237 | metallopeptidase activity                                                                                                     | 3.07E-05    | 0.000280703 |
|           | GO:0008188 | neuropeptide receptor activity                                                                                                | 4.78E-05    | 0.000417836 |
|           | GO:0006508 | proteolysis                                                                                                                   | 4.92E-05    | 0.000417836 |
|           | GO:0007165 | signal transduction                                                                                                           | 6.04E-05    | 0.000495163 |
|           | GO:0009190 | cyclic nucleotide biosynthetic process                                                                                        | 0.000113832 | 0.000873549 |
|           | GO:0016849 | phosphorus-oxygen lyase activity                                                                                              | 0.000113832 | 0.000873549 |
|           | GO:0004857 | enzyme inhibitor activity                                                                                                     | 0.000180566 | 0.001310251 |
|           | GO:0001733 | galactosylceramide sulfotransferase activity                                                                                  | 0.000187261 | 0.001310251 |
|           | GO:0009247 | glycolipid biosynthetic process                                                                                               | 0.000187261 | 0.001310251 |
|           | GO:0005267 | potassium channel activity                                                                                                    | 0.000275214 | 0.001870626 |
|           | GO:0030414 | peptidase inhibitor activity                                                                                                  | 0.00037529  | 0.002479984 |
|           | GO:0042246 | tissue regeneration                                                                                                           | 0.000390304 | 0.002509495 |
|           | GO:0004222 | metalloendopeptidase activity                                                                                                 | 0.000466924 | 0.002923126 |
|           | GO:0004553 | hydrolase activity, hydrolyzing O-glycosyl compounds                                                                          | 0.001027761 | 0.006269204 |
|           | GO:0016702 | oxidoreductase activity, acting on single donors with incorporation of molecular oxygen, incorporation of two atoms of oxygen | 0.001101749 | 0.006552506 |
|           | GO:0005125 | cytokine activity                                                                                                             | 0.001209654 | 0.007018787 |
|           | GO:0004383 | guanylate cyclase activity                                                                                                    | 0.001403582 | 0.007765229 |
|           | GO:0006182 | cGMP biosynthetic process                                                                                                     | 0.001403582 | 0.007765229 |

**Table S4. number of amphioxus orthologous groups with and without vertebrate ohnologs.**

|    | <b>all<br/>gene</b>         | <b>amphioxus<br/>duplicates</b> | <b>all<br/>gene</b>            | <b>amphioxus<br/>duplicates</b> | <b>P-value of Fisher's<br/>exact test</b> |
|----|-----------------------------|---------------------------------|--------------------------------|---------------------------------|-------------------------------------------|
|    | <b>with human ohnolog</b>   |                                 | <b>without human ohnolog</b>   |                                 |                                           |
| Bb |                             | 284                             |                                | 433                             | 1.70E-13                                  |
| Bf | 2198                        | 303                             | 6132                           | 511                             | 1.43E-10                                  |
| Bj |                             | 279                             |                                | 403                             | 5.29E-15                                  |
|    | <b>with chicken ohnolog</b> |                                 | <b>without chicken ohnolog</b> |                                 |                                           |
| Bb |                             | 294                             |                                | 397                             | 6.38E-22                                  |
| Bf | 1973                        | 330                             | 5949                           | 459                             | 7.32E-23                                  |
| Bj |                             | 286                             |                                | 370                             | 2.28E-23                                  |

**Table S5. GO enrichment for genes in amphioxus segmental duplications.**

| Species    | GO term                         | GO description                                                  | p value  | FDR      |
|------------|---------------------------------|-----------------------------------------------------------------|----------|----------|
| Bf         | GO:0015074                      | DNA_integration                                                 | 9.70E-14 | 5.50E-11 |
|            | GO:0006310                      | DNA_recombination                                               | 3.90E-09 | 1.10E-06 |
|            | GO:0004713                      | protein_tyrosine_kinase_activity                                | 1.30E-17 | 6.20E-15 |
|            | GO:0003676                      | nucleic_acid_binding                                            | 5.80E-15 | 1.40E-12 |
|            | GO:0008270                      | zinc_ion_binding                                                | 5.10E-07 | 8.40E-05 |
|            | GO:0004930                      | G-protein_coupled_receptor_activity                             | 2.10E-05 | 0.0025   |
|            | GO:0003691                      | double-stranded_telomeric_DNA_binding                           | 2.50E-05 | 0.0025   |
|            | GO:0003677                      | DNA_binding                                                     | 7.60E-05 | 6.20E-03 |
| Bj         | GO:0015074                      | DNA_integration                                                 | 5.50E-07 | 0.00034  |
|            | GO:0007186                      | G-protein_coupled_receptor_protein_signaling_pathway            | 4.00E-06 | 0.0012   |
|            | GO:0003001                      | generation_of_a_signal_involved_in_cell-cell_signaling          | 8.40E-05 | 0.0095   |
|            | GO:0006836                      | neurotransmitter_transport                                      | 8.40E-05 | 0.0095   |
|            | GO:0006310                      | DNA_recombination                                               | 9.10E-05 | 0.0095   |
|            | GO:0007269                      | neurotransmitter_secretion                                      | 5.50E-05 | 0.0095   |
|            | GO:0008773                      | [protein-PII]_uridylyltransferase_activity                      | 4.10E-08 | 2.00E-05 |
|            | GO:0070569                      | uridylyltransferase_activity                                    | 8.90E-08 | 2.20E-05 |
|            | GO:0004930                      | G-protein_coupled_receptor_activity                             | 6.50E-07 | 0.00011  |
| GO:0016779 | nucleotidyltransferase_activity | 8.90E-06                                                        | 0.0011   |          |
| Bb         | GO:0015074                      | DNA_integration                                                 | 1.50E-15 | 8.00E-13 |
|            | GO:0060249                      | anatomical_structure_homeostasis                                | 1.50E-10 | 1.60E-08 |
|            | GO:0000723                      | telomere_maintenance                                            | 1.50E-10 | 1.60E-08 |
|            | GO:0006310                      | DNA_recombination                                               | 1.30E-10 | 1.60E-08 |
|            | GO:0032200                      | telomere_organization                                           | 1.50E-10 | 1.60E-08 |
|            | GO:0006468                      | protein_amino_acid_phosphorylation                              | 1.30E-08 | 1.20E-06 |
|            | GO:0006259                      | DNA_metabolic_process                                           | 6.80E-08 | 5.20E-06 |
|            | GO:0016310                      | phosphorylation                                                 | 4.90E-07 | 3.30E-05 |
|            | GO:0006464                      | protein_modification_process                                    | 5.70E-06 | 0.00034  |
|            | GO:0043412                      | macromolecule_modification                                      | 2.10E-05 | 0.0012   |
|            | GO:0006796                      | phosphate_metabolic_process                                     | 2.60E-05 | 0.0013   |
|            | GO:0006793                      | phosphorus_metabolic_process                                    | 2.80E-05 | 0.0013   |
|            | GO:0043413                      | macromolecule_glycosylation                                     | 6.10E-05 | 0.0022   |
|            | GO:0009101                      | glycoprotein_biosynthetic_process                               | 6.60E-05 | 0.0022   |
|            | GO:0006486                      | protein_amino_acid_glycosylation                                | 6.10E-05 | 0.0022   |
|            | GO:0070085                      | glycosylation                                                   | 6.10E-05 | 0.0022   |
|            | GO:0009100                      | glycoprotein_metabolic_process                                  | 7.00E-05 | 0.0022   |
|            | GO:0043687                      | post-translational_protein_modification                         | 0.00013  | 0.0038   |
|            | GO:0006493                      | protein_amino_acid_O-linked_glycosylation                       | 0.00024  | 0.0068   |
|            | GO:0004713                      | protein_tyrosine_kinase_activity                                | 3.00E-19 | 1.20E-16 |
|            | GO:0003676                      | nucleic_acid_binding                                            | 4.80E-09 | 9.30E-07 |
|            | GO:0003678                      | DNA_helicase_activity                                           | 6.80E-09 | 9.30E-07 |
|            | GO:0004386                      | helicase_activity                                               | 1.30E-08 | 1.30E-06 |
|            | GO:0004672                      | protein_kinase_activity                                         | 2.50E-08 | 2.10E-06 |
|            | GO:0016772                      | transferase_activity,_transferring_phosphorus-containing_groups | 1.30E-07 | 9.00E-06 |
|            | GO:0016301                      | kinase_activity                                                 | 2.20E-07 | 1.30E-05 |
|            | GO:0016773                      | phosphotransferase_activity,_alcohol_group_as_acceptor          | 2.60E-07 | 1.30E-05 |
|            | GO:0016740                      | transferase_activity                                            | 4.90E-05 | 0.0022   |

**Table S6. QC of HiC data**

| Species   | Development Stages  | Paired Ends | Sequencing Depth(fold) | Total Read Pairs | Mapped Rates | Valid Pairs | PCR Read Pairs | Dup | Cis/Trans Ratio | Estimated Resolution/Kb |
|-----------|---------------------|-------------|------------------------|------------------|--------------|-------------|----------------|-----|-----------------|-------------------------|
| <b>Bf</b> | <b>1-cell</b>       | R1          | 81                     | 131,530,545      | 62.13%       | 51.89%      | 17.25%         |     | 3.61            | 2.3                     |
|           |                     | R2          |                        |                  | 61.63%       |             |                |     |                 |                         |
|           | <b>32-cell</b>      | R1          | 84                     | 136,779,099      | 63.65%       | 52.39%      | 14.95%         |     | 2.89            |                         |
|           |                     | R2          |                        |                  | 63.16%       |             |                |     |                 |                         |
|           | <b>64-cell</b>      | R1          | 94                     | 154,347,440      | 84.94%       | 60.72%      | 16.67%         |     | 3.43            | 2.05                    |
|           |                     | R2          |                        |                  | 84.39%       |             |                |     |                 |                         |
|           | <b>Gastrula</b>     | R1          | 61                     | 100,186,189      | 93.60%       | 70.17%      | 14.17%         |     | 7.98            | 2.27                    |
|           |                     | R2          |                        |                  | 93.14%       |             |                |     |                 |                         |
|           | <b>Larvae</b>       | R1          | 108                    | 175,939,611      | 94.79%       | 74.73%      | 14.39%         |     | 2.44            | 1.91                    |
|           |                     | R2          |                        |                  | 93.79%       |             |                |     |                 |                         |
|           | <b>Adult_muscle</b> | R1          | 79                     | 128,214,144      | 92.77%       | 68.49%      | 8.03%          |     | 2.03            | 2.2                     |
|           |                     | R2          |                        |                  | 92.14%       |             |                |     |                 |                         |
| <b>BB</b> | <b>Adult_muscle</b> | R1          | 90                     | 121,294,118      | 94.71%       | 76.04%      | 7.72%          |     | 2.03            | 1.98                    |
|           |                     | R2          |                        |                  | 93.25%       |             |                |     |                 |                         |
| <b>Bj</b> | <b>Adult_muscle</b> | R1          | 84                     | 106,681,598      | 96.45%       | 69.79%      | 9.23%          |     | 1.9             | 1.35                    |
|           |                     | R2          |                        |                  | 96.14%       |             |                |     |                 |                         |



**Table S7. Sequencing data produced in this study**

| Species      | Sequencing type | SRA accession | title                                                 |
|--------------|-----------------|---------------|-------------------------------------------------------|
| BjBf         | Pacbio          | SRR11013311   | Pacbio reads of the B. japonicum x B. floridae hybrid |
| BbBf         | Pacbio          | SRR11012663   | Pacbio reads of B. floridae x B. belcheri hybrid      |
| B. belcheri  | Hi-C            | SRR12007920   | B. belcheri muscle HiC                                |
| B. floridae  | Hi-C            | SRR12007919   | B. floridae muscle HiC                                |
| B. japonicum | Hi-C            | SRR12007918   | B. japonicum muscle HiC                               |
| B. floridae  | Hi-C            | SRR12059955   | Bf 1 cell stage Hi-C                                  |
| B. floridae  | Hi-C            | SRR12059954   | Bf 32 cell stage Hi-C                                 |
| B. floridae  | Hi-C            | SRR12059953   | Bf 64 cell stage Hi-C                                 |
| B. floridae  | Hi-C            | SRR12059952   | Bf gastrulation Hi-C                                  |
| B. floridae  | Hi-C            | SRR12059951   | Bf Larval Hi-C                                        |
| B. japonicum | ISO-seq         | SRR11023658   | iso-seq for bj female                                 |
| B. japonicum | ISO-seq         | SRR11023657   | iso-seq for bj male                                   |
| B. belcheri  | ISO-seq         | SRR11023656   | iso-seq for bb male                                   |
| B. belcheri  | ISO-seq         | SRR11023655   | iso-seq for bb female                                 |
| B. floridae  | ISO-seq         | SRR11023654   | iso-seq for bf female                                 |
| B. floridae  | ISO-seq         | SRR11023653   | iso-seq for bf male                                   |
| B. japonicum | RNA-seq         | SRR12011621   | Bj gonad-mature_male-1 RNA-seq                        |
| B. japonicum | RNA-seq         | SRR12011620   | Bj gonad-mature_male-2 RNA-seq                        |
| B. japonicum | RNA-seq         | SRR12011609   | Bj gonad-mature_male-3 RNA-seq                        |
| B. japonicum | RNA-seq         | SRR12011598   | Bj gonad-mature_female-2 RNA-seq                      |
| B. japonicum | RNA-seq         | SRR12011587   | Bj gonad-mature_female-1 RNA-seq                      |
| B. japonicum | RNA-seq         | SRR12011576   | Bj gonad-mature_female-3 RNA-seq                      |
| B. japonicum | RNA-seq         | SRR12011565   | Bj gonad-mature_female-4 RNA-seq                      |
| B. japonicum | RNA-seq         | SRR12011554   | Bj gonad-immature_male-2 RNA-seq                      |
| B. japonicum | RNA-seq         | SRR12011548   | Bj gonad-immature_male-1 RNA-seq                      |
| B. japonicum | RNA-seq         | SRR12011547   | Bj gonad-immature_male-3 RNA-seq                      |
| B. japonicum | RNA-seq         | SRR12011619   | Bj gonad-immature_female-4 RNA-seq                    |
| B. japonicum | RNA-seq         | SRR12011618   | Bj gonad-immature_female-5 RNA-seq                    |
| B. japonicum | RNA-seq         | SRR12011617   | Bj gonad-immature_female-1 RNA-seq                    |
| B. japonicum | RNA-seq         | SRR12011616   | Bj gonad-immature_female-2 RNA-seq                    |
| B. japonicum | RNA-seq         | SRR12011615   | Bj gonad-immature_female-3 RNA-seq                    |
| B. japonicum | RNA-seq         | SRR12011614   | Bj whole-body_male-1 RNA-seq                          |
| B. japonicum | RNA-seq         | SRR12011613   | Bj whole-body_male-2 RNA-seq                          |
| B. japonicum | RNA-seq         | SRR12011612   | Bj whole-body_male-3 RNA-seq                          |
| B. japonicum | RNA-seq         | SRR12011611   | Bj whole-body_male-4 RNA-seq                          |
| B. japonicum | RNA-seq         | SRR12011610   | Bj whole-body_female-1 RNA-seq                        |
| B. japonicum | RNA-seq         | SRR12011608   | Bj whole-body_female-2 RNA-seq                        |
| B. japonicum | RNA-seq         | SRR12011607   | Bj whole-body_female-3 RNA-seq                        |
| B. japonicum | RNA-seq         | SRR12011606   | Bj muscle_male-1 RNA-seq                              |
| B. japonicum | RNA-seq         | SRR12011605   | Bj muscle_female-1 RNA-seq                            |
| B. japonicum | RNA-seq         | SRR12011604   | Bj muscle_male-2 RNA-seq                              |
| B. japonicum | RNA-seq         | SRR12011603   | Bj muscle_male-3 RNA-seq                              |
| B. japonicum | RNA-seq         | SRR12011602   | Bj muscle_male-4 RNA-seq                              |
| B. japonicum | RNA-seq         | SRR12011601   | Bj muscle_female-2 RNA-seq                            |
| B. japonicum | RNA-seq         | SRR12011600   | Bj muscle_female-3 RNA-seq                            |
| B. japonicum | RNA-seq         | SRR12011599   | Bj muscle_female-4 RNA-seq                            |
| B. belcheri  | RNA-seq         | SRR12011597   | bb_gonad-immature_male-1 RNA-seq                      |
| B. belcheri  | RNA-seq         | SRR12011596   | bb_gonad-immature_male-2 RNA-seq                      |
| B. belcheri  | RNA-seq         | SRR12011595   | bb_gonad-immature_male-3 RNA-seq                      |
| B. belcheri  | RNA-seq         | SRR12011594   | bb_gonad-immature_male-4 RNA-seq                      |
| B. belcheri  | RNA-seq         | SRR12011593   | bb_gonad-mature_male-1 RNA-seq                        |
| B. belcheri  | RNA-seq         | SRR12011592   | bb_gonad-mature_male-2 RNA-seq                        |
| B. belcheri  | RNA-seq         | SRR12011591   | bb_gonad-mature_male-3 RNA-seq                        |
| B. belcheri  | RNA-seq         | SRR12011590   | bb_gonad-mature_male-4 RNA-seq                        |
| B. belcheri  | RNA-seq         | SRR12011589   | bb_gonad-mature_male-5 RNA-seq                        |
| B. belcheri  | RNA-seq         | SRR12011588   | bb_gonad-mature_male-6 RNA-seq                        |
| B. belcheri  | RNA-seq         | SRR12011586   | bb_gonad-mature_female-1 RNA-seq                      |
| B. belcheri  | RNA-seq         | SRR12011585   | bb_gonad-mature_female-2 RNA-seq                      |
| B. belcheri  | RNA-seq         | SRR12011584   | bb_gonad-mature_female-3 RNA-seq                      |
| B. belcheri  | RNA-seq         | SRR12011583   | bb_gonad-immature_female-1 RNA-seq                    |
| B. belcheri  | RNA-seq         | SRR12011582   | bb_gonad-immature_female-2 RNA-seq                    |
| B. belcheri  | RNA-seq         | SRR12011581   | bb_gonad-immature_female-3 RNA-seq                    |
| B. belcheri  | RNA-seq         | SRR12011580   | Bb muscle_male-1 RNA-seq                              |
| B. belcheri  | RNA-seq         | SRR12011579   | Bb muscle_male-2 RNA-seq                              |
| B. belcheri  | RNA-seq         | SRR12011578   | Bb muscle_male-3 RNA-seq                              |
| B. belcheri  | RNA-seq         | SRR12011577   | Bb muscle_female-1 RNA-seq                            |
| B. belcheri  | RNA-seq         | SRR12011575   | Bb muscle_female-2 RNA-seq                            |

| Species      | Sequencing type | SRA accession | title                                                   |
|--------------|-----------------|---------------|---------------------------------------------------------|
| B. belcheri  | RNA-seq         | SRR12011574   | Bb muscle_female-3 RNA-seq                              |
| B. floridae  | RNA-seq         | SRR12011573   | Bf gonad-mature_female-1 RNA-seq                        |
| B. floridae  | RNA-seq         | SRR12011572   | Bf gonad-immature_female-1 RNA-seq                      |
| B. floridae  | RNA-seq         | SRR12011571   | Bf gonad-immature_female-7 RNA-seq                      |
| B. floridae  | RNA-seq         | SRR12011570   | Bf gonad-immature_male-1 RNA-seq                        |
| B. floridae  | RNA-seq         | SRR12011569   | Bf gonad-immature_male-2 RNA-seq                        |
| B. floridae  | RNA-seq         | SRR12011568   | Bf gonad-immature_male-3 RNA-seq                        |
| B. floridae  | RNA-seq         | SRR12011567   | Bf gonad-immature_male-4 RNA-seq                        |
| B. floridae  | RNA-seq         | SRR12011566   | Bf gonad-immature_female-2 RNA-seq                      |
| B. floridae  | RNA-seq         | SRR12011564   | Bf gonad-immature_female-3 RNA-seq                      |
| B. floridae  | RNA-seq         | SRR12011563   | Bf gonad-immature_female-4 RNA-seq                      |
| B. floridae  | RNA-seq         | SRR12011562   | Bf gonad-immature_female-5 RNA-seq                      |
| B. floridae  | RNA-seq         | SRR12011561   | Bf gonad-immature_female-6 RNA-seq                      |
| B. floridae  | RNA-seq         | SRR12011560   | Bf gonad-mature_male-1 RNA-seq                          |
| B. floridae  | RNA-seq         | SRR12011559   | Bf gonad-mature_male-2 RNA-seq                          |
| B. floridae  | RNA-seq         | SRR12011558   | Bf gonad-mature_male-3 RNA-seq                          |
| B. floridae  | RNA-seq         | SRR12011557   | Bf muscle_male-1 RNA-seq                                |
| B. floridae  | RNA-seq         | SRR12011556   | Bf muscle_female-1 RNA-seq                              |
| B. floridae  | RNA-seq         | SRR12011555   | Bf muscle_male-2 RNA-seq                                |
| B. floridae  | RNA-seq         | SRR12011553   | Bf muscle_male-3 RNA-seq                                |
| B. floridae  | RNA-seq         | SRR12011552   | Bf muscle_male-4 RNA-seq                                |
| B. floridae  | RNA-seq         | SRR12011551   | Bf muscle_female-2 RNA-seq                              |
| B. floridae  | RNA-seq         | SRR12011550   | Bf muscle_female-3 RNA-seq                              |
| B. floridae  | RNA-seq         | SRR12011549   | Bf muscle_female-4 RNA-seq                              |
| BbBf         | Resequencing    | SRR11012662   | Illumina reads of B. floridae x B. belcheri hybrid      |
| BjBf         | Resequencing    | SRR11013310   | Illumina reads of the B. japonicum x B. floridae hybrid |
| B. japonicum | Resequencing    | SRR12010284   | Bj_male_1_reseq                                         |
| B. japonicum | Resequencing    | SRR12010283   | Bj_male_2_reseq                                         |
| B. japonicum | Resequencing    | SRR12010211   | Bj_male_3_reseq                                         |
| B. japonicum | Resequencing    | SRR12010200   | Bj_male_4_reseq                                         |
| B. japonicum | Resequencing    | SRR12010189   | Bj_male_5_reseq                                         |
| B. japonicum | Resequencing    | SRR12010178   | Bj_male_6_reseq                                         |
| B. japonicum | Resequencing    | SRR12010167   | Bj_male_7_reseq                                         |
| B. japonicum | Resequencing    | SRR12010156   | Bj_male_8_reseq                                         |
| B. japonicum | Resequencing    | SRR12010145   | Bj_male_9_reseq                                         |
| B. japonicum | Resequencing    | SRR12010134   | Bj_male_10_reseq                                        |
| B. japonicum | Resequencing    | SRR12010282   | Bj_male_11_reseq                                        |
| B. japonicum | Resequencing    | SRR12010271   | Bj_male_12_reseq                                        |
| B. japonicum | Resequencing    | SRR12010260   | Bj_male_13_reseq                                        |
| B. japonicum | Resequencing    | SRR12010249   | Bj_male_14_reseq                                        |
| B. japonicum | Resequencing    | SRR12010238   | Bj_male_15_reseq                                        |
| B. japonicum | Resequencing    | SRR12010227   | Bj_male_16_reseq                                        |
| B. japonicum | Resequencing    | SRR12010216   | Bj_male_17_reseq                                        |
| B. japonicum | Resequencing    | SRR12010214   | Bj_male_18_reseq                                        |
| B. japonicum | Resequencing    | SRR12010213   | Bj_male_19_reseq                                        |
| B. japonicum | Resequencing    | SRR12010212   | Bj_male_20_reseq                                        |
| B. japonicum | Resequencing    | SRR12010210   | Bj_male_21_reseq                                        |
| B. japonicum | Resequencing    | SRR12010209   | Bj_male_22_reseq                                        |
| B. japonicum | Resequencing    | SRR12010208   | Bj_male_23_reseq                                        |
| B. japonicum | Resequencing    | SRR12010207   | Bj_male_24_reseq                                        |
| B. japonicum | Resequencing    | SRR12010206   | Bj_male_25_reseq                                        |
| B. japonicum | Resequencing    | SRR12010205   | Bj_male_26_reseq                                        |
| B. japonicum | Resequencing    | SRR12010204   | Bj_male_27_reseq                                        |
| B. japonicum | Resequencing    | SRR12010203   | Bj_male_28_reseq                                        |
| B. japonicum | Resequencing    | SRR12010202   | Bj_male_29_reseq                                        |
| B. japonicum | Resequencing    | SRR12010201   | Bj_male_30_reseq                                        |
| B. japonicum | Resequencing    | SRR12010199   | Bj_male_31_reseq                                        |
| B. japonicum | Resequencing    | SRR12010198   | Bj_male_32_reseq                                        |
| B. japonicum | Resequencing    | SRR12010197   | Bj_male_33_reseq                                        |
| B. japonicum | Resequencing    | SRR12010196   | Bj_male_34_reseq                                        |
| B. japonicum | Resequencing    | SRR12010195   | Bj_male_35_reseq                                        |
| B. japonicum | Resequencing    | SRR12010194   | Bj_male_36_reseq                                        |
| B. japonicum | Resequencing    | SRR12010193   | Bj_male_37_reseq                                        |
| B. japonicum | Resequencing    | SRR12010192   | Bj_male_38_reseq                                        |
| B. japonicum | Resequencing    | SRR12010191   | Bj_male_39_reseq                                        |
| B. japonicum | Resequencing    | SRR12010190   | Bj_male_40_reseq                                        |
| B. japonicum | Resequencing    | SRR12010188   | Bj_male_41_reseq                                        |
| B. japonicum | Resequencing    | SRR12010187   | Bj_male_42_reseq                                        |
| B. japonicum | Resequencing    | SRR12010186   | Bj_male_43_reseq                                        |

| Species      | Sequencing type | SRA accession | title              |
|--------------|-----------------|---------------|--------------------|
| B. japonicum | Resequencing    | SRR12010185   | Bj_male_44_reseq   |
| B. japonicum | Resequencing    | SRR12010184   | Bj_male_45_reseq   |
| B. japonicum | Resequencing    | SRR12010183   | Bj_male_46_reseq   |
| B. japonicum | Resequencing    | SRR12010182   | Bj_male_47_reseq   |
| B. japonicum | Resequencing    | SRR12010181   | Bj_male_48_reseq   |
| B. japonicum | Resequencing    | SRR12010180   | Bj_female_1_reseq  |
| B. japonicum | Resequencing    | SRR12010179   | Bj_female_2_reseq  |
| B. japonicum | Resequencing    | SRR12010177   | Bj_female_3_reseq  |
| B. japonicum | Resequencing    | SRR12010176   | Bj_female_4_reseq  |
| B. japonicum | Resequencing    | SRR12010175   | Bj_female_5_reseq  |
| B. japonicum | Resequencing    | SRR12010174   | Bj_female_6_reseq  |
| B. japonicum | Resequencing    | SRR12010173   | Bj_female_7_reseq  |
| B. japonicum | Resequencing    | SRR12010172   | Bj_female_8_reseq  |
| B. japonicum | Resequencing    | SRR12010171   | Bj_female_9_reseq  |
| B. japonicum | Resequencing    | SRR12010170   | Bj_female_10_reseq |
| B. japonicum | Resequencing    | SRR12010169   | Bj_female_11_reseq |
| B. japonicum | Resequencing    | SRR12010168   | Bj_female_12_reseq |
| B. japonicum | Resequencing    | SRR12010166   | Bj_female_13_reseq |
| B. japonicum | Resequencing    | SRR12010165   | Bj_female_14_reseq |
| B. japonicum | Resequencing    | SRR12010164   | Bj_female_15_reseq |
| B. japonicum | Resequencing    | SRR12010163   | Bj_female_16_reseq |
| B. japonicum | Resequencing    | SRR12010162   | Bj_female_17_reseq |
| B. japonicum | Resequencing    | SRR12010161   | Bj_female_18_reseq |
| B. japonicum | Resequencing    | SRR12010160   | Bj_female_19_reseq |
| B. japonicum | Resequencing    | SRR12010159   | Bj_female_20_reseq |
| B. japonicum | Resequencing    | SRR12010158   | Bj_female_21_reseq |
| B. japonicum | Resequencing    | SRR12010157   | Bj_female_22_reseq |
| B. japonicum | Resequencing    | SRR12010155   | Bj_female_23_reseq |
| B. japonicum | Resequencing    | SRR12010154   | Bj_female_24_reseq |
| B. japonicum | Resequencing    | SRR12010153   | Bj_female_25_reseq |
| B. japonicum | Resequencing    | SRR12010152   | Bj_female_26_reseq |
| B. japonicum | Resequencing    | SRR12010151   | Bj_female_27_reseq |
| B. japonicum | Resequencing    | SRR12010150   | Bj_female_28_reseq |
| B. japonicum | Resequencing    | SRR12010149   | Bj_female_29_reseq |
| B. japonicum | Resequencing    | SRR12010148   | Bj_female_30_reseq |
| B. belcheri  | Resequencing    | SRR12010147   | Bb_male_1_reseq    |
| B. belcheri  | Resequencing    | SRR12010146   | Bb_male_2_reseq    |
| B. belcheri  | Resequencing    | SRR12010144   | Bb_male_3_reseq    |
| B. belcheri  | Resequencing    | SRR12010143   | Bb_male_4_reseq    |
| B. belcheri  | Resequencing    | SRR12010142   | Bb_male_5_reseq    |
| B. belcheri  | Resequencing    | SRR12010141   | Bb_male_6_reseq    |
| B. belcheri  | Resequencing    | SRR12010140   | Bb_male_7_reseq    |
| B. belcheri  | Resequencing    | SRR12010139   | Bb_male_8_reseq    |
| B. belcheri  | Resequencing    | SRR12010138   | Bb_male_9_reseq    |
| B. belcheri  | Resequencing    | SRR12010137   | Bb_male_10_reseq   |
| B. belcheri  | Resequencing    | SRR12010136   | Bb_male_11_reseq   |
| B. belcheri  | Resequencing    | SRR12010135   | Bb_male_12_reseq   |
| B. belcheri  | Resequencing    | SRR12010133   | Bb_male_13_reseq   |
| B. belcheri  | Resequencing    | SRR12010132   | Bb_male_14_reseq   |
| B. belcheri  | Resequencing    | SRR12010131   | Bb_male_15_reseq   |
| B. belcheri  | Resequencing    | SRR12010130   | Bb_male_16_reseq   |
| B. belcheri  | Resequencing    | SRR12010129   | Bb_male_17_reseq   |
| B. belcheri  | Resequencing    | SRR12010128   | Bb_male_18_reseq   |
| B. belcheri  | Resequencing    | SRR12010127   | Bb_male_19_reseq   |
| B. belcheri  | Resequencing    | SRR12010126   | Bb_male_20_reseq   |
| B. belcheri  | Resequencing    | SRR12010125   | Bb_female_1_reseq  |
| B. belcheri  | Resequencing    | SRR12010124   | Bb_female_3_reseq  |
| B. belcheri  | Resequencing    | SRR12010281   | Bb_female_5_reseq  |
| B. belcheri  | Resequencing    | SRR12010280   | Bb_female_7_reseq  |
| B. belcheri  | Resequencing    | SRR12010279   | Bb_female_8_reseq  |
| B. belcheri  | Resequencing    | SRR12010278   | Bb_female_9_reseq  |
| B. belcheri  | Resequencing    | SRR12010277   | Bb_female_10_reseq |
| B. belcheri  | Resequencing    | SRR12010276   | Bb_female_11_reseq |
| B. belcheri  | Resequencing    | SRR12010275   | Bb_female_12_reseq |
| B. belcheri  | Resequencing    | SRR12010274   | Bb_female_13_reseq |
| B. belcheri  | Resequencing    | SRR12010273   | Bb_female_14_reseq |
| B. belcheri  | Resequencing    | SRR12010272   | Bb_female_15_reseq |
| B. belcheri  | Resequencing    | SRR12010270   | Bb_female_16_reseq |
| B. belcheri  | Resequencing    | SRR12010269   | Bb_female_17_reseq |

| Species     | Sequencing type | SRA accession | title              |
|-------------|-----------------|---------------|--------------------|
| B. belcheri | Resequencing    | SRR12010268   | Bb_female_19_reseq |
| B. belcheri | Resequencing    | SRR12010267   | Bb_female_20_reseq |
| B. belcheri | Resequencing    | SRR12010266   | Bb_female_21_reseq |
| B. belcheri | Resequencing    | SRR12010265   | Bb_female_22_reseq |
| B. belcheri | Resequencing    | SRR12010264   | Bb_female_23_reseq |
| B. belcheri | Resequencing    | SRR12010263   | Bb_female_24_reseq |
| B. belcheri | Resequencing    | SRR12010262   | Bb_female_25_reseq |
| B. belcheri | Resequencing    | SRR12010261   | Bb_female_26_reseq |
| B. belcheri | Resequencing    | SRR12010259   | Bb_female_27_reseq |
| B. belcheri | Resequencing    | SRR12010258   | Bb_female_28_reseq |
| B. belcheri | Resequencing    | SRR12010257   | Bb_female_29_reseq |
| B. belcheri | Resequencing    | SRR12010256   | Bb_female_30_reseq |
| B. floridae | Resequencing    | SRR12010255   | Bf_male_1_reseq    |
| B. floridae | Resequencing    | SRR12010254   | Bf_male_2_reseq    |
| B. floridae | Resequencing    | SRR12010253   | Bf_male_3_reseq    |
| B. floridae | Resequencing    | SRR12010252   | Bf_male_4_reseq    |
| B. floridae | Resequencing    | SRR12010251   | Bf_male_5_reseq    |
| B. floridae | Resequencing    | SRR12010250   | Bf_male_6_reseq    |
| B. floridae | Resequencing    | SRR12010248   | Bf_male_7_reseq    |
| B. floridae | Resequencing    | SRR12010247   | Bf_male_8_reseq    |
| B. floridae | Resequencing    | SRR12010246   | Bf_male_9_reseq    |
| B. floridae | Resequencing    | SRR12010245   | Bf_female_1_reseq  |
| B. floridae | Resequencing    | SRR12010244   | Bf_female_2_reseq  |
| B. floridae | Resequencing    | SRR12010243   | Bf_female_3_reseq  |
| B. floridae | Resequencing    | SRR12010242   | Bf_female_4_reseq  |
| B. floridae | Resequencing    | SRR12010241   | Bf_female_5_reseq  |
| B. floridae | Resequencing    | SRR12010240   | Bf_female_6_reseq  |
| B. floridae | Resequencing    | SRR12010239   | Bf_female_7_reseq  |
| B. floridae | Resequencing    | SRR12010237   | Bf_female_8_reseq  |
| B. floridae | Resequencing    | SRR12010236   | Bf_female_9_reseq  |
| B. floridae | Resequencing    | SRR12010235   | Bf_female_10_reseq |
| B. floridae | Resequencing    | SRR12010234   | Bf_female_11_reseq |
| B. floridae | Resequencing    | SRR12010233   | Bf_female_12_reseq |
| B. floridae | Resequencing    | SRR12010232   | Bf_female_13_reseq |
| B. floridae | Resequencing    | SRR12010231   | Bf_female_14_reseq |
| B. floridae | Resequencing    | SRR12010230   | Bf_female_15_reseq |
| B. floridae | Resequencing    | SRR12010229   | Bf_female_16_reseq |
| B. floridae | Resequencing    | SRR12010228   | Bf_female_17_reseq |
| B. floridae | Resequencing    | SRR12010226   | Bf_female_18_reseq |
| B. floridae | Resequencing    | SRR12010225   | Bf_female_19_reseq |
| B. floridae | Resequencing    | SRR12010224   | Bf_female_20_reseq |
| B. floridae | Resequencing    | SRR12010223   | Bf_female_21_reseq |
| B. floridae | Resequencing    | SRR12010222   | Bf_female_22_reseq |
| B. floridae | Resequencing    | SRR12010221   | Bf_female_23_reseq |
| B. floridae | Resequencing    | SRR12010220   | Bf_female_24_reseq |
| B. floridae | Resequencing    | SRR12010219   | Bf_female_25_reseq |
| B. floridae | Resequencing    | SRR12010218   | Bf_female_26_reseq |
| B. floridae | Resequencing    | SRR12010217   | Bf_female_27_reseq |
| B. floridae | Resequencing    | SRR12010215   | Bf_female_28_reseq |

**Table S8. The list of Bf fully sex-linked genes and their sex-biased expression**

| Gene ID     | Start   | End     | Gene name          | Sex biased (immature gonad) |
|-------------|---------|---------|--------------------|-----------------------------|
| bf_00005984 | 25770   | 28110   | Similar to ZNF626  | unbiased                    |
| bf_00005985 | 28279   | 28898   | Similar to PLEKHH1 | unbiased                    |
| bf_00005986 | 32629   | 76251   | unknown            | unbiased                    |
| bf_00005987 | 78779   | 81223   | Similar to ZNF160  | female-biased               |
| bf_00005988 | 86987   | 97961   | unknown            | unbiased                    |
| bf_00005989 | 99614   | 120042  | NFKB2              | unbiased                    |
| bf_00005990 | 119886  | 124449  | RNLS               | female-biased               |
| bf_00005991 | 128618  | 142909  | SGPL1              | male-biased                 |
| bf_00005992 | 144804  | 248870  | PSD2               | unbiased                    |
| bf_00005993 | 145943  | 146783  | Similar to FGFR10P | unbiased                    |
| bf_00005994 | 270552  | 276389  | Similar to COLEC11 | unbiased                    |
| bf_00005995 | 281987  | 286544  | unknown            | unbiased                    |
| bf_00005996 | 290042  | 297045  | CASP7              | female-biased               |
| bf_00005997 | 302604  | 304101  | unknown            | unbiased                    |
| bf_00005998 | 306213  | 309543  | Similar to DDX24   | unbiased                    |
| bf_00005999 | 310091  | 313561  | Similar to C2CD6   | unbiased                    |
| bf_00006000 | 314097  | 315644  | Similar to MAP4K1  | unbiased                    |
| bf_00006001 | 316492  | 371775  | PTPN13             | male-biased                 |
| bf_00006002 | 374019  | 375212  | Similar to ISLR2   | unbiased                    |
| bf_00006003 | 453232  | 482224  | Similar to FGFR2   | female-biased               |
| bf_00006004 | 492188  | 558734  | PRSS12             | unbiased                    |
| bf_00006005 | 561180  | 585923  | Similar to HABP2   | unbiased                    |
| bf_00006006 | 582919  | 592650  | Similar to CASP7   | unbiased                    |
| bf_00006007 | 596706  | 598707  | unknown            | unbiased                    |
| bf_00006008 | 604321  | 607724  | Similar to LAMP1   | unbiased                    |
| bf_00006009 | 608992  | 632949  | Similar to PAQR3   | unbiased                    |
| bf_00006010 | 638496  | 645100  | unknown            | unbiased                    |
| bf_00006011 | 657029  | 662915  | unknown            | unbiased                    |
| bf_00006012 | 665902  | 670319  | Similar to HPGDS   | unbiased                    |
| bf_00006013 | 671306  | 673798  | Similar to HPGDS   | unbiased                    |
| bf_00006014 | 674899  | 677345  | Similar to HPGDS   | unbiased                    |
| bf_00006015 | 678606  | 685111  | Similar to HPGDS   | female-biased               |
| bf_00006016 | 701114  | 704281  | Similar to HPGDS   | unbiased                    |
| bf_00006017 | 705383  | 705589  | Similar to HPGDS   | unbiased                    |
| bf_00006018 | 706263  | 709741  | unknown            | unbiased                    |
| bf_00006019 | 716198  | 718309  | Similar to MYO16   | unbiased                    |
| bf_00006020 | 731360  | 736577  | Similar to AKT3    | unbiased                    |
| bf_00006021 | 738850  | 743633  | C4H4ORF45          | male-biased                 |
| bf_00006022 | 743444  | 759735  | GMCL1              | male-biased                 |
| bf_00006023 | 760882  | 763715  | unknown            | female-biased               |
| bf_00006024 | 769153  | 788647  | EIF4E              | female-biased               |
| bf_00006025 | 795176  | 812068  | unknown            | unbiased                    |
| bf_00006026 | 811708  | 817190  | LOC422643          | male-biased                 |
| bf_00006027 | 823106  | 823396  | Similar to LOXL2   | unbiased                    |
| bf_00006028 | 832528  | 833835  | unknown            | unbiased                    |
| bf_00006029 | 834403  | 836018  | Similar to LRRC8E  | unbiased                    |
| bf_00006030 | 837397  | 842500  | unknown            | unbiased                    |
| bf_00006031 | 842747  | 870172  | LOC422643          | unbiased                    |
| bf_00006032 | 878016  | 879224  | unknown            | unbiased                    |
| bf_00006033 | 887726  | 895652  | unknown            | unbiased                    |
| bf_00006034 | 898440  | 917209  | NCAPG              | unbiased                    |
| bf_00006035 | 919708  | 969288  | unknown            | female-biased               |
| bf_00006036 | 959371  | 968788  | unknown            | unbiased                    |
| bf_00006037 | 972405  | 998401  | unknown            | male-biased                 |
| bf_00006038 | 999430  | 1003874 | Similar to HPN     | unbiased                    |
| bf_00006039 | 1006988 | 1014562 | Similar to ST14    | unbiased                    |
| bf_00006040 | 1016906 | 1117146 | CAMK2A             | female-biased               |
| bf_00006041 | 1130921 | 1141957 | Similar to CTRB1   | unbiased                    |
| bf_00006042 | 1150421 | 1161241 | Similar to KLKB1   | unbiased                    |
| bf_00006043 | 1176830 | 1231659 | unknown            | unbiased                    |
| bf_00006044 | 1198940 | 1201398 | unknown            | unbiased                    |
| bf_00006045 | 1199512 | 1200122 | Similar to TANGO6  | unbiased                    |
| bf_00006046 | 1229244 | 1233367 | Similar to KLC3    | unbiased                    |
| bf_00006047 | 1234587 | 1290879 | Similar to TTC24   | unbiased                    |
| bf_00006048 | 1297756 | 1306162 | unknown            | unbiased                    |
| bf_00006049 | 1307211 | 1351153 | UNC5B              | unbiased                    |
| bf_00006050 | 1484998 | 1520556 | unknown            | unbiased                    |

| Gene ID     | Start   | End     | Gene name          | Sex biased (immature gonad) |
|-------------|---------|---------|--------------------|-----------------------------|
| bf_00006051 | 1525327 | 1553340 | Similar to STPG2   | male-biased                 |
| bf_00006052 | 1555816 | 1658625 | FSTL5              | unbiased                    |
| bf_00006053 | 1662184 | 1690275 | ANXA11             | female-biased               |
| bf_00006054 | 1691379 | 1693675 | Similar to OR51B5  | unbiased                    |
| bf_00006055 | 1761746 | 1769217 | DYDC1              | male-biased                 |
| bf_00006056 | 1768928 | 1778660 | RBM22              | unbiased                    |
| bf_00006057 | 1777346 | 1790060 | Similar to USP39   | female-biased               |
| bf_00006058 | 1790142 | 1793274 | unknown            | unbiased                    |
| bf_00006059 | 1812551 | 1866964 | PRKG1              | unbiased                    |
| bf_00006060 | 1868732 | 1872340 | unknown            | unbiased                    |
| bf_00006061 | 1873709 | 1884340 | LOC112530190       | unbiased                    |
| bf_00006062 | 1896109 | 1993532 | CDH23              | unbiased                    |
| bf_00006063 | 2026449 | 2037641 | Similar to DHRS7   | female-biased               |
| bf_00006064 | 2043266 | 2056048 | DNAJB12            | unbiased                    |
| bf_00006065 | 2056257 | 2064362 | LIPA               | unbiased                    |
| bf_00006066 | 2065928 | 2072000 | LIPA               | unbiased                    |
| bf_00006067 | 2075035 | 2078487 | H2AFZ              | unbiased                    |
| bf_00006068 | 2080598 | 2082653 | Similar to IKZF3   | unbiased                    |
| bf_00006069 | 2097686 | 2103895 | DDIT4              | female-biased               |
| bf_00006070 | 2108176 | 2142643 | WAPL               | male-biased                 |
| bf_00006071 | 2217378 | 2348138 | Similar to COL24A1 | unbiased                    |
| bf_00006072 | 2369262 | 2373427 | FGL1               | unbiased                    |
| bf_00006073 | 2374896 | 2383042 | unknown            | unbiased                    |
| bf_00006074 | 2391500 | 2397794 | IPMK               | female-biased               |
| bf_00006075 | 2397617 | 2416994 | DDX21              | female-biased               |
| bf_00006076 | 2419941 | 2433562 | Similar to IRF1    | female-biased               |
| bf_00006077 | 2450401 | 2450907 | Similar to DDX60   | unbiased                    |
| bf_00006078 | 2465461 | 2472045 | STAMBPL1           | unbiased                    |
| bf_00006079 | 2473923 | 2513340 | AAK1               | unbiased                    |
| bf_00006080 | 2520060 | 2524911 | unknown            | unbiased                    |
| bf_00006081 | 2525417 | 2525752 | Similar to ITGAM   | unbiased                    |
| bf_00006082 | 2525786 | 2526583 | unknown            | unbiased                    |
| bf_00006083 | 2527496 | 2528833 | unknown            | unbiased                    |
| bf_00006084 | 2529263 | 2530066 | unknown            | unbiased                    |
| bf_00006085 | 2568464 | 2592853 | Similar to HNRNPC  | unbiased                    |
| bf_00006086 | 2626989 | 2693251 | NRG2               | female-biased               |
| bf_00006087 | 2651479 | 2652197 | unknown            | unbiased                    |
| bf_00006088 | 2700731 | 2702881 | unknown            | unbiased                    |
| bf_00006089 | 2716543 | 2781971 | Similar to DAW1    | unbiased                    |
| bf_00006090 | 2801908 | 2820266 | unknown            | unbiased                    |
| bf_00006091 | 2822370 | 2832111 | HGSNAT             | female-biased               |
| bf_00006092 | 2850844 | 2867705 | unknown            | unbiased                    |
| bf_00006093 | 2878484 | 2898440 | Similar to CACNA1A | unbiased                    |
| bf_00006094 | 2899230 | 3069267 | Similar to HMCN2   | unbiased                    |
| bf_00006095 | 3077534 | 3109449 | Similar to PLAT    | unbiased                    |
| bf_00006096 | 3085917 | 3090352 | Similar to ZNF845  | unbiased                    |
| bf_00006097 | 3109033 | 3110160 | unknown            | unbiased                    |
| bf_00006098 | 3113650 | 3147295 | Mar-01             | unbiased                    |
| bf_00006099 | 3151862 | 3157985 | FUT11              | unbiased                    |
| bf_00006100 | 3158069 | 3161260 | MRPS24             | unbiased                    |
| bf_00006101 | 3163044 | 3166793 | LOC112530190       | unbiased                    |
| bf_00006102 | 3166894 | 3176486 | Similar to ZNF845  | unbiased                    |
| bf_00006103 | 3176731 | 3182072 | Similar to ZNF569  | unbiased                    |
| bf_00006104 | 3183833 | 3187935 | Similar to ZNF845  | unbiased                    |
| bf_00006105 | 3191639 | 3223167 | Similar to FCN1    | unbiased                    |
| bf_00006106 | 3226442 | 3256518 | Similar to ANGPT2  | unbiased                    |
| bf_00006107 | 3259670 | 3261469 | unknown            | unbiased                    |
| bf_00006108 | 3261471 | 3264177 | unknown            | unbiased                    |
| bf_00006109 | 3264948 | 3265283 | Similar to PDK2    | unbiased                    |
| bf_00006110 | 3265317 | 3266111 | unknown            | unbiased                    |
| bf_00006111 | 3266895 | 3268232 | unknown            | unbiased                    |
| bf_00006112 | 3268662 | 3269084 | Similar to RBM12   | unbiased                    |
| bf_00006113 | 3269087 | 3269449 | unknown            | unbiased                    |
| bf_00006114 | 3273627 | 3276017 | Similar to COL6A5  | unbiased                    |
| bf_00006115 | 3287007 | 3320673 | Similar to DMBT1   | unbiased                    |
| bf_00006116 | 3320866 | 3328910 | Similar to COL6A5  | unbiased                    |
| bf_00006117 | 3334831 | 3335824 | Similar to IVL     | unbiased                    |
| bf_00006118 | 3336219 | 3337532 | unknown            | unbiased                    |
| bf_00006119 | 3339416 | 3341485 | unknown            | unbiased                    |

| Gene ID     | Start   | End     | Gene name          | Sex biased (immature gonad) |
|-------------|---------|---------|--------------------|-----------------------------|
| bf_00006120 | 3343369 | 3345438 | unknown            | unbiased                    |
| bf_00006121 | 3346668 | 3349278 | Similar to ANGPTL2 | unbiased                    |
| bf_00006122 | 3358888 | 3384500 | LOC107053715       | unbiased                    |
| bf_00006123 | 3392628 | 3433662 | LOC107053715       | unbiased                    |
| bf_00006124 | 3435568 | 3439522 | Similar to ZNF160  | unbiased                    |
| bf_00006125 | 3441063 | 3442454 | Similar to ZNF431  | female-biased               |
| bf_00006126 | 3443913 | 3447349 | unknown            | unbiased                    |
| bf_00006127 | 3448351 | 3454148 | ACTA2              | male-biased                 |
| bf_00006128 | 3457784 | 3463168 | SKP1               | male-biased                 |
| bf_00006129 | 3464706 | 3470562 | Similar to CRIP1   | unbiased                    |
| bf_00006130 | 3472693 | 3478227 | unknown            | unbiased                    |
| bf_00006131 | 3479268 | 3482047 | Similar to SOAT2   | unbiased                    |
| bf_00006132 | 3482108 | 3483148 | Similar to ZNF75D  | unbiased                    |
| bf_00006133 | 3497962 | 3511283 | unknown            | unbiased                    |
| bf_00006134 | 3514020 | 3537993 | SEC24D             | female-biased               |
| bf_00006135 | 3538414 | 3541257 | Similar to SAR1B   | male-biased                 |
| bf_00006136 | 3544856 | 3547356 | SAR1B              | unbiased                    |
| bf_00006137 | 3553192 | 3559008 | unknown            | unbiased                    |
| bf_00006138 | 3561175 | 3577293 | SEC24B             | unbiased                    |
| bf_00006139 | 3579351 | 3583111 | unknown            | unbiased                    |
| bf_00006140 | 3582172 | 3594755 | UBE2D1             | male-biased                 |
| bf_00006141 | 3600256 | 3611655 | unknown            | unbiased                    |
| bf_00006142 | 3614264 | 3616678 | ELOVL6             | female-biased               |
| bf_00006143 | 3618449 | 3626276 | AP1AR              | unbiased                    |
| bf_00006144 | 3628349 | 3633464 | C4H4ORF47          | male-biased                 |
| bf_00006145 | 3633840 | 3654936 | CCAR1              | male-biased                 |
| bf_00006146 | 3657722 | 3662483 | TXNDC15            | female-biased               |
| bf_00006147 | 3664132 | 3664398 | Similar to FAT2    | female-biased               |
| bf_00006148 | 3664592 | 3666031 | Similar to ZNF568  | female-biased               |
| bf_00006149 | 3676986 | 3677345 | Similar to CSNK1A1 | unbiased                    |
| bf_00006150 | 3696390 | 3722175 | Similar to EDIL3   | unbiased                    |
| bf_00006151 | 3734195 | 3759624 | Similar to PKD1L2  | unbiased                    |
| bf_00006152 | 3767859 | 3768423 | Similar to CCDC168 | unbiased                    |
| bf_00006153 | 3770221 | 3873067 | FRAS1              | female-biased               |
| bf_00006154 | 3877109 | 3880947 | Similar to ZNF347  | female-biased               |
| bf_00006155 | 3882872 | 3897882 | SH2D4B             | female-biased               |
| bf_00006156 | 3901826 | 3903393 | Similar to PAXBP1  | male-biased                 |
| bf_00006157 | 3905719 | 3927140 | DNA2               | unbiased                    |
| bf_00006158 | 3927393 | 3932782 | DCK                | unbiased                    |
| bf_00006159 | 3934841 | 3940372 | Similar to ELOVL5  | unbiased                    |
| bf_00006160 | 3940530 | 3958514 | USO1               | female-biased               |
| bf_00006161 | 3961846 | 3967907 | Similar to TRIO    | unbiased                    |
| bf_00006162 | 3968440 | 3973987 | Similar to ZNF845  | unbiased                    |
| bf_00006163 | 3980656 | 3985941 | ARHGAP24           | female-biased               |
| bf_00006164 | 3991229 | 4006653 | MAPK9              | unbiased                    |
| bf_00006165 | 4011266 | 4017269 | Similar to ST8SIA1 | unbiased                    |
| bf_00006166 | 4018636 | 4023863 | COX18              | female-biased               |
| bf_00006167 | 4030424 | 4065856 | unknown            | unbiased                    |
| bf_00006168 | 4069210 | 4074849 | SLC25A16           | female-biased               |
| bf_00006169 | 4075850 | 4076158 | Similar to GRM5    | unbiased                    |
| bf_00006170 | 4077247 | 4083225 | ADH5               | female-biased               |
| bf_00006171 | 4084210 | 4094090 | METAP1             | female-biased               |
| bf_00006172 | 4093730 | 4099919 | LRRC20             | unbiased                    |
| bf_00006173 | 4102116 | 4103302 | unknown            | unbiased                    |
| bf_00006174 | 4107523 | 4109459 | unknown            | unbiased                    |
| bf_00006175 | 4109744 | 4127205 | unknown            | unbiased                    |
| bf_00006176 | 4127333 | 4128688 | Similar to E2F7    | unbiased                    |
| bf_00006177 | 4133625 | 4142775 | EIF4EBP2           | female-biased               |

**Table S9. The list of Bj fully sex-linked genes and their sex-biased expression**

| Gene ID     | Start   | End     | Gene name          | Sex biased (immature gonad) |
|-------------|---------|---------|--------------------|-----------------------------|
| bj_00002076 | 2110238 | 2112225 | Similar to ABCA1   | unbiased                    |
| bj_00002077 | 2112958 | 2132529 | ZFYVE19            | unbiased                    |
| bj_00002078 | 2132655 | 2153864 | TYRO3              | unbiased                    |
| bj_00002079 | 2156622 | 2232922 | Similar to KNTC1   | female-biased               |
| bj_00002080 | 2234883 | 2244565 | unknown            | male-biased                 |
| bj_00002081 | 2247090 | 2250784 | Similar to ZDHHC24 | unbiased                    |
| bj_00002082 | 2251509 | 2262747 | KATNBL1            | female-biased               |
| bj_00002083 | 2274785 | 2360274 | WDR27              | unbiased                    |
| bj_00002084 | 2370813 | 2394250 | THBS1              | unbiased                    |
| bj_00002085 | 2374705 | 2375252 | Similar to VIP     | unbiased                    |
| bj_00002086 | 2401971 | 2466792 | FSIP1              | unbiased                    |
| bj_00002087 | 2469411 | 2473829 | FAM228             | unbiased                    |
| bj_00002088 | 2501223 | 2517859 | C5H14ORF169        | unbiased                    |
| bj_00002089 | 2528747 | 2539333 | Similar to MCFD2   | unbiased                    |
| bj_00002090 | 2554478 | 2568127 | Similar to PAX3    | unbiased                    |
| bj_00002091 | 2571040 | 2572994 | MCFD2              | unbiased                    |
| bj_00002092 | 2573419 | 2589307 | TAF1A              | unbiased                    |
| bj_00002093 | 2592460 | 2596653 | unknown            | male-biased                 |
| bj_00002094 | 2596724 | 2597732 | Similar to MMP9    | male-biased                 |
| bj_00002095 | 2602791 | 2617210 | MACROD2            | male-biased                 |
| bj_00002096 | 2621438 | 2649601 | CFAP36             | unbiased                    |
| bj_00002097 | 2650447 | 2719785 | CCDC88C            | unbiased                    |
| bj_00002098 | 2721245 | 2726433 | GLO1               | female-biased               |
| bj_00002099 | 2738972 | 2739172 | Similar to VPS13B  | unbiased                    |
| bj_00002100 | 2747625 | 2762158 | SLC30A6            | unbiased                    |
| bj_00002101 | 2768033 | 2768546 | GNG4               | unbiased                    |
| bj_00002102 | 2775145 | 2779688 | Similar to ZNF26   | unbiased                    |
| bj_00002103 | 2790003 | 2798638 | BCKDHA             | unbiased                    |
| bj_00002104 | 2799415 | 2802926 | ADCK1              | male-biased                 |
| bj_00002105 | 2803623 | 2811605 | EXOSC5             | unbiased                    |
| bj_00002106 | 2815085 | 2817881 | Similar to PCGF1   | unbiased                    |
| bj_00002107 | 2840607 | 2855400 | Similar to CALM1   | unbiased                    |
| bj_00002108 | 2878706 | 2889477 | Similar to CALM1   | male-biased                 |
| bj_00002109 | 2946552 | 2986265 | Similar to CALM1   | unbiased                    |
| bj_00002110 | 3017590 | 3091283 | SCFD1              | female-biased               |



**Dataset S1.** Ohnolog group gene list

**SI References**

1. O. Simakov, *et al.*, Deeply conserved synteny resolves early events in vertebrate evolution. *Nat. Ecol. Evol.* **4**, 820–830 (2020).
2. S. Mawaribuchi, Y. Ito, M. Ito, Independent evolution for sex determination and differentiation in the DMRT family in animals. *Biol. Open* **8**, bio041962 (2019).
